# Supplementary material for: Experiences of living with long COVID and of accessing healthcare services: a qualitative systematic review
Source: PubMed Central journal article supplement — BMJ Open. 2022 Jan 10;12(1):e050979. doi: 10.1136/bmjopen-2021-050979 (PMC8753091; doi:10.1136/bmjopen-2021-050979), 2022-01-10
Supplement: bmjopen-2021-050979.draft_revisions.pdf [file bmjopen-2021-050979.draft_revisions.pdf]

# BMJ Open

BMJ Open is committed to open peer review. As part of this commitment we make the peer review history of every article we publish publicly available.

When an article is published we post the peer reviewers' comments and the authors' responses online. We also post the versions of the paper that were used during peer review. These are the versions that the peer review comments apply to.

The versions of the paper that follow are the versions that were submitted during the peer review process. They are not the versions of record or the final published versions. They should not be cited or distributed as the published version of this manuscript.

BMJ Open is an open access journal and the full, final, typeset and author-corrected version of record of the manuscript is available on our site with no access controls, subscription charges or pay-per-view fees (<http://bmjopen.bmj.com>).

If you have any questions on BMJ Open's open peer review process please email [info.bmjopen@bmj.com](mailto:info.bmjopen@bmj.com)

# BMJ Open

## Experiences of living with long COVID and of accessing healthcare services: a qualitative systematic review

|                               |                                                                                                                                                                                                                                                                                                                                                       |
|-------------------------------|-------------------------------------------------------------------------------------------------------------------------------------------------------------------------------------------------------------------------------------------------------------------------------------------------------------------------------------------------------|
| Journal:                      | <i>BMJ Open</i>                                                                                                                                                                                                                                                                                                                                       |
| Manuscript ID                 | bmjopen-2021-050979                                                                                                                                                                                                                                                                                                                                   |
| Article Type:                 | Original research                                                                                                                                                                                                                                                                                                                                     |
| Date Submitted by the Author: | 05-Mar-2021                                                                                                                                                                                                                                                                                                                                           |
| Complete List of Authors:     | Macpherson, Karen; Healthcare Improvement Scotland Glasgow, Cooper, K; Robert Gordon University, School of Health Sciences Harbour, Jenny; Healthcare Improvement Scotland Glasgow Mahal, Dawn; Healthcare Improvement Scotland Glasgow Miller, Charis; Healthcare Improvement Scotland Glasgow Nairn, Moray; Healthcare Improvement Scotland Glasgow |
| Keywords:                     | Organisation of health services < HEALTH SERVICES ADMINISTRATION & MANAGEMENT, Quality in health care < HEALTH SERVICES ADMINISTRATION & MANAGEMENT, INFECTIOUS DISEASES, QUALITATIVE RESEARCH, VIROLOGY                                                                                                                                              |
|                               |                                                                                                                                                                                                                                                                                                                                                       |

SCHOLARONE™  
Manuscripts

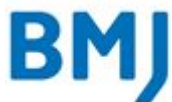

I, the Submitting Author has the right to grant and does grant on behalf of all authors of the Work (as defined in the below author licence), an exclusive licence and/or a non-exclusive licence for contributions from authors who are: i) UK Crown employees; ii) where BMJ has agreed a CC-BY licence shall apply, and/or iii) in accordance with the terms applicable for US Federal Government officers or employees acting as part of their official duties; on a worldwide, perpetual, irrevocable, royalty-free basis to BMJ Publishing Group Ltd ("BMJ") its licensees and where the relevant Journal is co-owned by BMJ to the co-owners of the Journal, to publish the Work in this journal and any other BMJ products and to exploit all rights, as set out in our [licence](#).

The Submitting Author accepts and understands that any supply made under these terms is made by BMJ to the Submitting Author unless you are acting as an employee on behalf of your employer or a postgraduate student of an affiliated institution which is paying any applicable article publishing charge ("APC") for Open Access articles. Where the Submitting Author wishes to make the Work available on an Open Access basis (and intends to pay the relevant APC), the terms of reuse of such Open Access shall be governed by a Creative Commons licence – details of these licences and which [Creative Commons](#) licence will apply to this Work are set out in our licence referred to above.

Other than as permitted in any relevant BMJ Author's Self Archiving Policies, I confirm this Work has not been accepted for publication elsewhere, is not being considered for publication elsewhere and does not duplicate material already published. I confirm all authors consent to publication of this Work and authorise the granting of this licence.

# Experiences of living with long COVID and of accessing healthcare services: a qualitative systematic review

Corresponding author: Karen Macpherson, Delta House, 50 West Nile Street, Glasgow, G1 2NP. UK

[Karen.macpherson3@nhs.scot](mailto:Karen.macpherson3@nhs.scot)

## Authors:

Professor Kay Cooper, School of Health Sciences, Robert Gordon University, Aberdeen, UK

Jenny Harbour, Healthcare Improvement Scotland, Glasgow UK

Dawn Mahal, Healthcare Improvement Scotland, Glasgow UK

Charis Miller, Healthcare Improvement Scotland, Glasgow UK

Moray Nairn, Healthcare Improvement Scotland, Glasgow UK

Word count: 4,667

## ABSTRACT

**Objective** To explore the experiences of people living with long COVID and how they perceive the healthcare services available to them.

**Design** Qualitative systematic review

**Data sources** Electronic literature searches of websites, bibliographic databases and discussion forums, including PubMed LitCovid, Proquest COVID, EPPI Centre living systematic map of evidence, medRxiv, bioRxiv, Medline, Psychinfo and Web of Science Core Collection were conducted to identify qualitative literature published in English up to 13 January 2021.

**Inclusion criteria** Papers reporting qualitative or mixed-methods studies that focussed on the experiences of long COVID and/or perceptions of accessing healthcare by people with long COVID. Title/abstract and full-text screening were conducted by two reviewers independently, with conflicts resolved by discussion or a third reviewer.

**Quality appraisal** Two reviewers independently appraised included studies using the qualitative CASP checklist. Conflicts were resolved by discussion or a third reviewer.

**Data extraction and synthesis** Thematic synthesis, involving line-by-line reading, generation of concepts, descriptive and analytical themes, was conducted by the review team with regular discussion.

**Results** Five studies published in 2020 met the inclusion criteria, two international surveys and three qualitative studies from the UK. Sample sizes varied from 24 (interview study) to 3,762 (survey). Participants were predominantly young white females recruited from social media or online support groups. Three analytical themes were generated: (i) symptoms and self-directed management of long COVID; (ii) emotional aspects of living with long COVID, and (iii) healthcare experiences associated with long COVID.

### Conclusions

People experience long COVID as a heterogeneous condition, with a variety of physical and emotional consequences. It appears that greater knowledge of long COVID is required by a number of stakeholders, and that the design of emerging long COVID services, or adaptation of existing services for long COVID patients should take account of patients' experiences in their design.

### Strengths and limitations of this study

- This is the first qualitative review on people's experiences of long COVID and of the healthcare services available to them.
- This review highlights a range of important issues associated with long COVID and accessing healthcare, which can be used to inform service delivery and design.
- Only 5 qualitative studies were eligible for inclusion in this review.
- Participants in the included studies were predominantly younger, female, and users of social media or online support groups.

## INTRODUCTION

The long-term effects of COVID-19 are recognised increasingly as being heterogeneous and complex in nature. At the start of the COVID-19 pandemic there was a widespread perception that COVID-19 was an acute infection that resulted in death or recovery after 2 weeks.<sup>1</sup> However, many people experienced wide-ranging and fluctuating symptoms for weeks or months after confirmed or suspected COVID-19 infection. As these experiences were shared, on social media and other outlets, the term ‘long COVID’ was generated by patients.<sup>2</sup> There remains no internationally agreed definition of long COVID, as COVID-19 is still a relatively new disease, with ongoing research on the long-term effects.<sup>3</sup> Greenhalgh *et al*<sup>4</sup> suggested “post-acute COVID-19” for symptoms lasting beyond 3 weeks after onset, and “chronic COVID-19” for those lasting beyond 12 weeks. Recent UK guidelines defined “ongoing symptomatic COVID-19” as signs and symptoms lasting 4-12 weeks and “post-COVID-19 syndrome” as signs and symptoms developing during or after COVID-19 and continuing beyond 12 weeks.<sup>5,6</sup> As this systematic review is concerned with lived experience, we will use the patient-generated term long COVID to encapsulate all these definitions.

Symptoms of long COVID vary widely, can relapse and remit, and can affect those hospitalised and ventilated,<sup>3</sup> as well as those with so-called mild COVID-19, during the acute phase.<sup>4</sup> Little is known about long-term sequelae in asymptomatic patients, with this recently highlighted as an important area for future research.<sup>3</sup> Potential long-term effects include central nervous system, psychosocial, cardiovascular, pulmonary, haematologic, renal and gastrointestinal symptoms, as well as widely reported persistent fatigue, dyspnoea, joint and chest pain.<sup>3</sup> Estimates of long COVID rates vary from 10%<sup>4</sup> to 35%<sup>7</sup> with the true rate yet to be determined. Therefore, with over 108,000,000 confirmed COVID-19 cases globally as of 30<sup>th</sup> January 2021,<sup>8</sup> there are now a large number of people at risk of long COVID.

Healthcare services specifically for long COVID are evolving. For example, some specialist centres have been set up in parts of the UK,<sup>9</sup> and there has been a global call for the development of rehabilitation programmes and services for long COVID patients.<sup>10</sup> In order for healthcare services to meet patients’ needs, it is important to understand the experience of long COVID and of accessing healthcare services from patients’ perspectives. There is a growing body of qualitative research on the lived experience of long COVID, and to date, no published synthesis of this literature. The aim of this qualitative systematic review was therefore to explore the experiences of people living with long COVID and their perceptions of the healthcare services available to them.

## METHODS

A qualitative systematic literature review was undertaken based on an *a priori* protocol (available on request) and reported in accordance with the Preferred Reporting Items for Systematic Reviews and Meta-Analyses (PRISMA) statement.<sup>11</sup> This review updates a review undertaken by the authors to inform the production of the Scottish Intercollegiate Guidelines Network (SIGN), National Institute of Health and Care Excellence (NICE) and

Royal College of General Practitioners (RCGP) guideline on the management of long COVID.<sup>5</sup>  
6

### **Inclusion criteria**

Full details of the inclusion criteria for the review are given in supplementary file 1.

Participants: Individuals experiencing long COVID whether suspected or confirmed by diagnostic test, with no restriction on duration of symptoms. We excluded studies on the views or experiences of healthcare for conditions other than COVID-19 and those relating to the views of healthcare staff, unless they were patients themselves.

Phenomena of interest: people's views on and experiences of living with and managing long COVID, and on the healthcare services available to them.

Context: studies from any country and any setting.

Types of study: systematic reviews of qualitative studies; primary qualitative studies; qualitative components of mixed method studies.

### **Information sources and search strategy**

An information specialist (CM) carried out a search in October 2020. Sources searched included: PubMed LitCovid, Proquest COVID, EPPI Centre living systematic map of evidence, medRxiv, bioRxiv, Medline, PsychInfo, and Web of Science Core Collection. A full list of resources searched is available in supplementary file 2. Published studies, grey literature and pre-publication articles were sought. In databases not specific to COVID-19, search results were limited to publications in 2020. All searches were limited to English language. A search update was conducted on 13 January 2021.

Bibliographic database searches applied adapted versions of the qualitative research filter by DeJean *et al* (2016)<sup>12</sup> and a filter for patient experience literature developed by combining terms from papers by Selva *et al* (2017)<sup>13</sup> and Wessels *et al* (2016)<sup>14</sup>. The search strategy for Medline is available in supplementary file 2. Search strategies for other bibliographic databases are available on request.

### **Study selection**

Citations were uploaded to EndNote software and duplicates removed. Records were screened against the inclusion criteria based on titles and abstracts by two reviewers independently (JH, DM). The same two reviewers then assessed full text of potentially relevant articles. Disagreements were discussed and referred to a third reviewer where necessary (KM, MN).

### **Data extraction**

Two reviewers independently extracted descriptive data from each study (KC, JH, KM, DM, MN), using a data extraction template designed specifically for this review. Details extracted from the studies included: country in which the study was conducted, method of data collection and analysis, phenomena of interest, setting / context / culture, participant characteristics and sample size, and a description of the main results.

### Quality appraisal

Included studies were critically appraised by two reviewers independently (KC, JH, KM, DM, MN, JH) using the CASP qualitative checklist (<https://casp-uk.net/casp-tools-checklists/>). Discrepancies were discussed and referred to a third reviewer if required.

### Data synthesis

Thematic synthesis was undertaken on the findings from included studies.<sup>15</sup> This involved: (i) line-by-line reading of each study by two reviewers independently (JH, KM, MN) to identify initial concepts; (ii) grouping similar concepts into initial descriptive themes and sub-themes, and (iii) generating the final analytical themes. These were discussed and agreed by the review team (KC, JH, KM, DM, MN) throughout the process.

### Patient and public involvement

As a systematic review focussed on published and grey literature no primary research involving patients was conducted. The original synthesis that this review updates, was subject to review by an expert group that included several members with lived experience of long COVID, and a targeted public consultation which included groups representing those with experience of this condition.

## RESULTS

### Search results

The literature search identified 269 articles. A further two studies were identified from reference lists. After removal of duplicates and title/abstract screening, seven articles were evaluated as full-text. The main reasons for excluding articles were no qualitative element to the research, no patient involvement and not meeting our definition of Long Covid (we were interested in studies relating to symptoms over 4 weeks duration). Out of the seven fully evaluated articles, one study was excluded because it did not use qualitative methods or contain data on direct patient experience. A second study which was initially included was later excluded after it was withdrawn from pre-publication by the authors. A PRISMA flow diagram depicting the study selection process is provided in figure 1.

[INSERT Figure 1 PRISMA diagram]

### Characteristics of included studies



1  
2  
3 Five studies were included in the thematic synthesis (table 1).<sup>1 16-19</sup> Three studies conducted  
4 focus groups or interviews with patients from the UK and two studies, from the Patient Led  
5 Research group, conducted international surveys with most responses coming from the USA  
6 and the UK. Sample sizes varied from 24 interviews to 3,762 survey respondents, and were  
7 generally weighted towards young, white, female participants. In the focus groups the  
8 median age was 43 while in the social media groups most responders were aged 30-49  
9 years. All studies focussed on adults not children.  
10  
11

12  
13 [INSERT Table 1 Study characteristics]  
14

### 15 **Methodological quality**

16  
17  
18 Studies were of variable methodological quality. Three met most of the criteria on the CASP  
19 checklist (table 2) and thus were considered of high quality, and two met fewer criteria. No  
20 studies were excluded on the basis of quality as all were considered to offer valuable  
21 content despite the limitations identified.  
22

23  
24 [INSERT Table 2 CASP]  
25

26 All five studies recruited participants through social media and/or online support groups.  
27 While this is understandable given the need to quickly access participants for whom no  
28 established groups or organisations existed, this convenience sampling may have resulted in  
29 bias. People who are active on social media or online support groups are likely to differ from  
30 the general population (for example, younger age) and may be more vocal about their  
31 experiences. Three included studies acknowledged skewed sample characteristics including  
32 mainly white ethnicity, over-representation of women, and a generally younger age group.<sup>16</sup>  
33  
34  
35  
36  
37  
38  
39  
40  
41  
42  
43  
44  
45  
46  
47  
48  
49  
50  
51  
52  
53  
54  
55  
56  
57  
58  
59  
60

None of the studies discussed potential biases arising from the relationship between  
researchers and study participants. This is despite people with lived experience of long  
COVID symptoms being among the study authors, or performing data analysis in some  
studies.<sup>16 17 19</sup> This participatory research approach can be considered to represent both a  
strength and a weakness. Having authors and researchers with experience of long COVID  
analyse data is beneficial in bringing lived experience to the interpretation of data.  
However, it may also introduce bias for the same reason.

Several other quality issues were noted. In the study by Kingstone *et al*<sup>17</sup>, participants  
received a compensation voucher for their time, which may have influenced decisions on  
whether to participate. Ladds *et al*<sup>18</sup> only fully transcribed the first 10 out of the 55  
interviews (the remaining interviews were partially transcribed). This was due to the  
urgency of the work and limited resources plus a perceived lack of need to duplicate  
previously discovered themes. This may have introduced bias. Finally, Maxwell<sup>1</sup> reported  
very limited methodological details, making it difficult to determine how the research was  
conducted or the number of people involved in the focus group.

## Review findings

The initial stages of thematic analysis resulted in the generation of 138 descriptive themes. These were then refined into 54 sub-themes, which were attributed to 11 higher order themes using an iterative process, with continuous discussion between reviewers. Further review and refinement of themes resulted in three overarching analytical themes: (i) symptoms and self-directed management of long COVID; (ii) emotional aspects of living with long COVID; and (iii) healthcare experiences associated with long COVID. Figure 2 shows the relationship between the final three themes and the initial 11 higher order themes. Full details of descriptive themes and sub-themes are available in supplementary file 3.

[INSERT Figure 2 Mindmap of themes]

### Symptoms and self-directed management of long COVID

Evidence from all the included studies<sup>1 16-19</sup> showed that people with long COVID experience a wider range of symptoms than the three symptoms officially recognised as acute COVID-19: high temperature, new continuous cough, and change or loss of sense of smell or taste. One individual stated:

*“From week four I started to get chest pains and then breathlessness, gradually other symptoms developed including dry mouth, sore tongue, joint pains, fatigue, rash and tachycardia.”<sup>1</sup>*

The symptoms experienced by patients with long COVID varied in severity from relatively mild to potentially life-threatening symptoms that required hospital admission. Symptoms also fluctuated over time with new symptoms appearing at different stages of the illness and in different parts of the body. Each symptom was experienced for a prolonged but variable length of time, with a cumulative effect in many cases.

People identified a disconnect between their lived experiences, official advice, and public perception of the illness. It was felt that the public perceived the illness as a binary condition – either mild and easily treated at home or serious and requiring hospitalisation – with no variation or allowances made for ongoing symptoms.

*“So, COVID-19, it’s either a mild infection or you die? No. But no one is prepared to think about us.”<sup>17</sup>*

The literature showed that people believed they would require a short recovery period and would be back at work in two weeks, a belief mirrored by employers and the public. The lived experience, for some, was quite different:

*“After nearly 6 months I have started to feel some improvement, although doing anything remotely physical results in a flare up of symptoms...”<sup>1</sup>*

*“I had to take two weeks off, had to work from home for four, but had to return for two weeks with fever as my employer would not give me more time [...]”<sup>16</sup>*

1  
2  
3 This discordance between expectations and experience seemed to have a direct effect on  
4 the mental and emotional state of those experiencing prolonged illness, often leading to  
5 uncertainty about what to do about their symptoms. People described needing to adjust  
6 their lifestyle, including pacing themselves and setting realistic goals, in order to self-  
7 manage their symptoms. A number of patients described attempts at self-care such as  
8 taking supplements or trying therapeutic massage.  
9  
10

11 Many people turned to social media and support groups (online or face-to-face) for support  
12 and found them to be a valuable way to share experiences, knowledge and resources with  
13 others in a similar situation. This communication helped to validate patient experiences and  
14 provided reassurance they were not alone in their struggle with long-term symptoms.  
15  
16

17  
18 *“At least I know I'm not alone. And I think people who actually have had the disease tend to*  
19 *know a little bit more about it... I actually think that the support group has given more*  
20 *knowledge than the doctors have.”<sup>18</sup>*  
21

22  
23 However, there were also reports of anxiety and depression triggered by knowledge  
24 garnered from these online groups.  
25

26  
27 *“...Internet support groups, yeah on the Facebook groups that I'm on, I mean to be honest, I*  
28 *try not to read that group too much because it depresses me, makes me a bit anxious.”<sup>17</sup>*  
29

### 30 **Emotional aspects of living with long COVID**

31

32 For many patients there was a feeling that their self-identity was affected by long COVID.  
33 People reported an impact on how they viewed themselves, before and after their illness.  
34 There was a feeling they had to reconsider who they were and what they could do within  
35 the context of family and work. The phrase “compared with how I used to be” was used by  
36 multiple participants<sup>17</sup>. Ladds *et al* (2020)<sup>18</sup> commented on the concept of a “spoiled  
37 identity” where an identity as previously “healthy, independent and successful” was  
38 perceived to be threatened.  
39  
40

41  
42 Interviews with doctors and other clinicians who had experienced long COVID showed that  
43 many were worried about the impact of cognitive deficits on their ability to perform their  
44 jobs.  
45

46  
47 *“[T]he medicolegal aspect is huge .... and it's scary to not be able to recognise potentially*  
48 *where you have deficits because if you can't recognise them then that's an unknown*  
49 *unknown in what can you do with that.”<sup>18</sup>*  
50

51  
52 There was a sense of stigma associated with long COVID, with people experiencing a sense  
53 of shame and blame (internally generated stigma) and expressing fears that employers and  
54 others in the community may stigmatise them for having long COVID (externally generated  
55 stigma). Family members were considered to be affected by long COVID and were seen as  
56 also requiring support. One interview participant described the impact her symptoms had  
57 on her family and how she felt they did not believe her:  
58  
59  
60

1  
2  
3 *"I think, at first, they just thought, 'Oh, for god's sake, she's napping again'. I feel like I*  
4 *constantly have to explain. I'm just exhausted and I just want to know why I'm so exhausted*  
5 *...."*<sup>17</sup>  
6  
7

8 Patients described experiencing a range of emotions as part of their illness journey. Anxiety  
9 was often related to multiple aspects of the illness including uncertainty about the cause of  
10 symptoms, concern that they may never recover completely, and anxiety due to not being  
11 believed by healthcare professionals, family and friends.  
12

13  
14 *"... I was really frightened, terrified and just thought I might die on a couple of occasions ...*  
15 *maybe not "I'm going to die right now", but definitely "I'm never going to get better from*  
16 *this" kind of feeling."*<sup>17</sup>  
17  
18

19 Patients also expressed a strong desire to find acceptance and understanding about their  
20 experiences of long COVID, both among healthcare professionals and family and friends.  
21

22  
23 *"... one of my friends did say after quite a while, "I'm not being awful, but do you think a lot*  
24 *of it's in his mind?" and I said "no". I was quite upset about that..."*<sup>17</sup>  
25

26 Similarly, there was a widespread perception that healthcare professionals doubted  
27 patients' descriptions of long COVID, ignored patient concerns, misdiagnosed symptoms, or  
28 were dismissive of patient experiences. This lack of knowledge affected people's feelings  
29 around their healthcare experiences.  
30  
31

### 32 **Healthcare experiences**

33  
34  
35 Across all of the studies, participants expressed concerns relating to the lack of knowledge,  
36 information and understanding about long COVID among healthcare professionals. While  
37 the reason behind this lack of knowledge was understood, there was a general feeling that  
38 there needed to be acknowledgement of this gap within the healthcare community.  
39

40  
41 *"Well yeah, I feel like there's a lack of knowledge. And I really wasn't able to get any*  
42 *answers, I know, you know this is obviously a novel illness. But just even for one doctor to*  
43 *look into it a bit and come back to me, didn't happen."*<sup>17</sup>  
44  
45

46 The absence of knowledge and information about long COVID symptoms was reported to  
47 create anxiety and confusion for patients. Ladds *et al* (2020)<sup>18</sup> found that this confusion was  
48 intensified by the lack of medical knowledge, understanding and guidance from healthcare  
49 professionals. There were also reports of conflicting or inconsistent advice from health  
50 professionals.<sup>18</sup>  
51

52  
53 Some professionals did recognise the limitations of their own knowledge<sup>18</sup> and referred  
54 patients to online support groups. Focus group participants suggested they would rather be  
55 told that the professional did not have the knowledge required to address their illness, if  
56 that was the case. The importance of finding a General Practitioner (GP) who was  
57 understanding, empathetic and who provided support to those experiencing long COVID is  
58 highlighted in this quote:  
59  
60

1  
2  
3  
4  
5 *"I have to say it was a really powerful experience speaking to the GPs ... the two more recent*  
6 *ones, actually just the experience of being heard and feeling like somebody got it and was*  
7 *being kind about it, but you know it was okay that they couldn't do anything, I just kind of*  
8 *needed to know that I wasn't losing it really and it was real what I was experiencing, I think*  
9 *so that was really helpful."*<sup>17</sup>  
10

11 Along with this perceived lack of knowledge, multiple perceived barriers to healthcare  
12 access were reported, along with a general perception among participants that health  
13 services and doctors were too busy dealing with cases of acute COVID-19 to have capacity to  
14 deal with anything else, including patients with long-term symptoms. This perception  
15 appeared strengthened by the difficulties people experienced when trying to access primary  
16 care, especially if they were seeking a face-to-face consultation.  
17  
18

19  
20  
21 *"I think the message to avoid hospital and the GP unless you had specific symptoms was very*  
22 *unhelpful, particularly as I didn't have, and never have had, a cough or fever"*<sup>1</sup>  
23

24 In general, study participants found accessing care to be "complex, difficult and  
25 exhausting".<sup>18</sup> This difficulty in accessing care and perceived lack of access, led to patients  
26 describing how they felt they had to manipulate the inflexible algorithm-driven systems in  
27 order to receive care, which led to feelings of guilt and anger. Some patients described  
28 creative solutions they had come up with to help them access healthcare, while others  
29 reported resorting to private healthcare to access tests. Many patients felt they needed to  
30 conduct their own research and construct their own care pathways, taking the lead in  
31 arranging consultations with specialists and circumventing bottlenecks in the system. This  
32 was reported as a route often employed by medical professionals who themselves were  
33 suffering from long COVID.  
34  
35

36  
37 Those who reported experiencing long-term symptoms described a perceived lack of  
38 support within the system. Some individuals described how NHS111 (a national telehealth  
39 helpline in the UK) had directed them to their GP who then directed them back to NHS111.<sup>18</sup>  
40 There was what appeared to be a lack of guidance for those who did not need to be  
41 admitted to hospital but were no longer in the acute phase of the illness.  
42  
43

44  
45 Patients who felt they had received satisfactory care and access to healthcare were  
46 generally those who had been offered follow-up appointments and who felt their healthcare  
47 providers gave them ongoing support, even if that was in the form of a video or telephone  
48 call.  
49

50  
51 Telemedicine was widely used to facilitate interactions with healthcare services. However, it  
52 was generally perceived by patients to have limitations. Remote consulting with primary  
53 care was viewed by some patients as potentially limiting direct access to GPs, disrupting  
54 continuity of care (people often could not see the same GP every time), and making the  
55 communication of symptoms more challenging. Some patients felt that strict adherence to  
56 protocols for telemedicine-delivered care affected patient safety or led to mismanagement  
57 of their care.  
58  
59  
60

1  
2  
3  
4  
5  
6  
7  
8  
9  
10  
11  
12  
13  
14  
15  
16  
17  
18  
19  
20  
21  
22  
23  
24  
25  
26  
27  
28  
29  
30  
31  
32  
33  
34  
35  
36  
37  
38  
39  
40  
41  
42  
43  
44  
45  
46  
47  
48  
49  
50  
51  
52  
53  
54  
55  
56  
57  
58  
59  
60

*"... I remembered ringing my GP from the floor on my lounge laying on my front and kind of saying I'm really short of breath, you know, do you think I should try an inhaler do I need to go back to A&E and I was kind of told well you don't really sound too out of breath over the phone .... I really felt at that point right if you could see me you would see that I am really like broken"<sup>18</sup>*

A positive view expressed in relation to telemedicine was that it increased accessibility of primary care during periods of societal restrictions aimed at controlling the spread of COVID-19.

*"My doctor was available via messaging, telephone, and telemedicine. She also contracted COVID-19 so she shared her experience with recovery and it helped me stay calm that I was on the right track."<sup>19</sup>*

When asked to describe desirable features of healthcare services or service delivery for patients with long COVID, research participants asked for face-to-face assessments and talked about the need for 'one-stop clinics' with multidisciplinary teams (MDT) who could look at their wide-ranging symptoms and treat them holistically. A case manager to oversee individual patients and ensure that all aspects of their care was considered was suggested, along with meaningful referral pathways and criteria.

*"What would be most helpful is if all main hospitals could have a Covid clinic that had experts from respiratory, cardiology, rheumatology, neurology, physiotherapy etc, so you could go along for half a day and see people from these different departments, they can refer you for tests and you can get a plan in place, we are having such a range of symptoms that GPs are struggling to know what to do with you"<sup>1</sup>*

Other participants spoke about wanting to be listened to, to be believed and understood, and to be offered practical advice on coping.

## DISCUSSION

To our knowledge, this is the first synthesis of findings from qualitative studies on peoples' experiences of living with long COVID and accessing healthcare services for this condition. Our main findings were threefold. Firstly, that the lived experience of long COVID is highly variable and perceived as being at odds with public perceptions and official guidance on COVID-19. Secondly, that there are significant emotional consequences of living with long COVID that need to be understood by a number of stakeholders. Finally, that people with long COVID report a range of positive and negative healthcare experiences that can be used to inform the development of new, or adaptation of existing, services for this important patient group.

Covid-19 is a new illness, first declared a public health emergency by the World Health Organization on 30<sup>th</sup> January 2020.<sup>20</sup> The implications across the globe and stress on healthcare services are unprecedented. It is perhaps unsurprising that knowledge of long COVID is perceived as underdeveloped; there is no agreed definition of long COVID and the long-term sequelae are to a large extent unknown.<sup>3</sup> Many people in the included studies

1  
2  
3 turned to social media and patient-led support groups, due to perceived lack of  
4 understanding from family, employers and healthcare professionals.<sup>1 17-19</sup> Indeed, the term  
5 long COVID originated from social media postings.<sup>2</sup> Whilst these groups were seen by some  
6 as reassuring and supportive, for others they generated anxiety. Social media and support  
7 groups are widely used for other health conditions,<sup>21</sup> but are generally considered  
8 complementary to healthcare services; part of the “jigsaw” that makes supported self-  
9 management successful.<sup>22</sup> Therefore, there appears to be a need for more widespread  
10 understanding of and information about long COVID, and people with lived experience are  
11 ideally placed to contribute their expert opinion.  
12  
13  
14

15  
16 Our review highlighted a number of emotional consequences of long COVID including the  
17 impact on people’s identities, employment, and relationships with family and healthcare  
18 providers. Emerging models and recommendations for managing long COVID all highlight  
19 the need for psychological inputs.<sup>23-25</sup> It is perhaps more complex to address the wider  
20 emotional consequences highlighted by this review; however, understanding and  
21 information as described above and targeted at various levels (e.g. healthcare professionals,  
22 patients, public, employers) appears to be indicated.  
23  
24

25  
26 In addition to lack of knowledge, the review found a number of barriers to accessing  
27 healthcare, with reports of unhelpful messaging and complex processes to navigate.  
28 Healthcare professionals with long COVID were more able to navigate this complex system  
29 than non-professionals, suggesting a potential inequality. Telemedicine, rapidly rolled-out in  
30 many countries as a way of maintaining healthcare during the pandemic,<sup>26</sup> was not always  
31 seen as beneficial. As new models for managing long COVID emerge, these findings may be  
32 useful for ensuring that services are patient-centred.<sup>27</sup> The finding that patients want  
33 multidisciplinary, holistic services is congruent with the well-documented multi-organ  
34 nature of COVID-19, and heterogeneous nature of long COVID symptoms.<sup>3</sup>  
35  
36  
37

### 38 **Strengths and limitations**

39  
40 Our review has highlighted a range of important issues associated with long COVID and  
41 accessing healthcare, from the perspective of people with this condition. The review is  
42 limited by the small number of qualitative studies (n=5) that have been published to date,  
43 and will benefit from being updated as further research becomes available. The majority of  
44 studies were conducted in the UK, there was over-representation of younger and female,  
45 white, participants, and all studies recruited participants via social media or online support  
46 groups. Therefore, the findings apply to this population, and it is possible that other groups  
47 of people with long COVID have different experiences and views. We limited our search to  
48 studies published in English, therefore it is possible that we missed studies published in  
49 other languages. We did not exclude studies on methodological quality, resulting in the  
50 inclusion of one study with limited methodological details resulting in a low CASP score.  
51 However, the validity of appraisal of qualitative research is debated in the literature,<sup>28</sup> and  
52 we are confident that all studies contributed valuable data on the lived experience of long  
53 COVID.  
54  
55  
56

### 57 **Implications for practice**

1  
2  
3 There is a need for greater understanding and communication about long COVID at a  
4 number of levels (public, policy and healthcare professional). Our findings suggest that  
5 people with long COVID are well placed to co-create this understanding and communication.  
6 Our findings can also be used by those currently developing services for people with long  
7 COVID, to ensure that they meet patients' needs.  
8  
9

### 10 **Implications for Research**

11  
12  
13 Further qualitative research on more culturally diverse samples of people with long COVID is  
14 indicated to help understand the impact of long COVID and the healthcare needs of the  
15 wider population than is represented by the current review. As models of care and services  
16 are developed/adapted for people with long COVID, it is vital that the views and experiences  
17 of people with long COVID continue to be explored.  
18  
19

### 20 **CONCLUSION**

21  
22  
23 We have presented a synthesis of the current qualitative evidence on the experience of  
24 living with Long Covid and of accessing healthcare services. People experience Long Covid as  
25 a heterogeneous condition, with a variety of physical and emotional consequences. It  
26 appears that greater knowledge of Long Covid is required by a number of stakeholders, and  
27 that the design of emerging Long Covid services, or adaptation of existing services for Long  
28 Covid patients should take account of patients' experiences in their design.  
29  
30

### 31 **Funding statement**

32  
33  
34 This research received no specific grant from any funding agency in the public, commercial  
35 or not-for-profit sectors.  
36  
37

### 38 **Contributors**

39  
40  
41 DM, JH, KC, KM and MN developed the protocol. CM conducted the literature searches. JH  
42 and DM screened articles for inclusion. KM, DM, JH and MN extracted data, appraised  
43 studies, and, including KC, were involved with synthesising the qualitative data, interpreting  
44 the findings and writing the first draft of the manuscript. Other members of the research  
45 teams within Robert Gordon University, Aberdeen, and Healthcare Improvement Scotland  
46 provided peer review comments on the draft manuscript.  
47  
48

### 49 **Competing interests**

50  
51 None declared.  
52  
53

### 54 **Data sharing statement**

55  
56  
57 All data are available from the reports or authors of the primary research. No additional  
58 data are available.  
59  
60



## REFERENCES

1. Maxwell D. Living with COVID19: a dynamic review of the evidence around ongoing Covid19 symptoms (often called Long Covid) 2020 [2020 Nov 02]. Available from: <https://evidence.nihr.ac.uk/themedreview/living-with-covid19/>.
2. Callard F, Perego E. How and why patients made Long Covid. *Soc Sci Med* 2021;268:113426.
3. Higgins V, Sohaei D, Diamandis EP, et al. COVID-19: from an acute to chronic illness? Potential long-term health consequences. *Crit Rev Clin Lab Sci* 2020 [published Online First: 21 Dec 2020]
4. Greenhalgh T, Knight M, A'Court C, et al. Management of post-acute covid-19 in primary care. *BMJ* 2020;370:m3026.
5. National Institute for Health and Care Excellence (NICE). COVID-19 rapid guideline: managing the long-term effects of COVID-19 2020 [2 Feb 2021]. Available from: <https://www.nice.org.uk/guidance/ng188>.
6. Scottish Intercollegiate Guidelines Network (SIGN). Managing the long-term effects of COVID-19 2020 [2 Feb 2021]. Available from: <https://www.sign.ac.uk/our-guidelines/managing-the-long-term-effects-of-covid-19/>.
7. Centers for Disease Control and Prevention (USA). Morbidity and mortality weekly report: symptom duration and risk factors for delayed return to usual health among outpatients with COVID-19 in a multistate health care systems network — United States, March–June 2020 2020 [2 Feb 2021]. Available from: <https://www.cdc.gov/mmwr/volumes/69/wr/mm6930e1.htm>.
8. World Health Organization (WHO). Coronavirus disease (COVID-19) pandemic 2021 [2 Feb 2021]. Available from: <https://www.who.int/emergencies/diseases/novel-coronavirus-2019>.
9. NHS England. NHS to offer 'long covid' sufferers help at specialist centres 2020 [2 Feb 2020]. Available from: <https://www.england.nhs.uk/2020/10/nhs-to-offer-long-covid-help/>.
10. Gutenbrunner C, Stokes EK, Dreinhofer K, et al. Why rehabilitation must have priority during and after the COVID-19-pandemic: a position statement of the Global Rehabilitation Alliance. *J Rehabil Med* 2020;52(7):jrm00081.
11. Moher D, Liberati A, Tetzlaff J, et al. Preferred reporting items for systematic reviews and meta-analyses: the PRISMA statement. *BMJ* 2009;339:b2535. doi: 10.1136/bmj.b2535 [published Online First: 2009/07/23]
12. DeJean D, Giacomini M, Simeonov D, et al. Finding Qualitative Research Evidence for Health Technology Assessment. *Qual Health Res* 2016;26(10):1307-17. doi: 10.1177/1049732316644429 [published Online First: 2016/04/28]
13. Selva A, Sola I, Zhang Y, et al. Development and use of a content search strategy for retrieving studies on patients' views and preferences. *Health Qual Life Outcomes* 2017;15(1):126. doi: 10.1186/s12955-017-0698-5 [published Online First: 2017/08/31]
14. Wessels M, Hielkema L, van der Weijden T. How to identify existing literature on patients' knowledge, views, and values: the development of a validated search filter. *J Med Libr Assoc* 2016;104(4):320-24. doi: 10.3163/1536-5050.104.4.014 [published Online First: 2016/11/09]
15. Thomas J, Harden A. Methods for the thematic synthesis of qualitative research in systematic reviews. *BMC Med Res Methodol* 2008;8:45. doi: 10.1186/1471-2288-8-45 [published Online First: 2008/07/12]
16. Davis HE, Assaf GS, McCorkell L, et al. Characterizing long COVID in an international cohort: 7 months of symptoms and their impact. 2021
17. Kingstone T, Taylor AK, O'Donnell CA, et al. Finding the 'right' GP: a qualitative study of the experiences of people with long-COVID. *BJGP open* 2020;13:13. doi: <https://dx.doi.org/10.3399/bjgpopen20X101143>

- 1
- 2
- 3
- 4 18. Ladds E, Rushforth A, Wieringa S, et al. Persistent symptoms after Covid-19: qualitative study of
- 5 114 "long Covid" patients and draft quality principles for services. *BMC health services*
- 6 *research* 2020;20(1):1144. doi: <https://dx.doi.org/10.1186/s12913-020-06001-y>
- 7
- 8 19. Patient Led Research. Report: What Does COVID-19 Recovery Actually Look Like? An Analysis of
- 9 the Prolonged COVID-19 Symptoms Survey by Patient-Led Research Team 2020 [2020 Oct 27
- 10 ]. Available from: <https://patientresearchcovid19.com/research/report-1/>.
- 11
- 12 20. World Health Organization (WHO). COVID-19 public health emergency of international concern:
- 13 global research and innovation forum - towards a research roadmap 2020 [16 Feb 2021].
- 14 Available from: [https://www.who.int/publications/m/item/covid-19-public-health-](https://www.who.int/publications/m/item/covid-19-public-health-emergency-of-international-concern-(pheic)-global-research-and-innovation-forum)
- 15 [emergency-of-international-concern-\(pheic\)-global-research-and-innovation-forum](https://www.who.int/publications/m/item/covid-19-public-health-emergency-of-international-concern-(pheic)-global-research-and-innovation-forum).
- 16
- 17 21. Myneni S LB, Singh T, Paiva K, Kim SM, Cebula AV, Villanueva G, Wang J,. Diabetes self-
- 18 management in the age of social media: large-scale analysis of peer interactions using
- 19 semiautomated methods. *JMIR Med Inform* 2020;8(6):e18441.
- 20
- 21 22. Anderson N OG. "It all needs to be a full jigsaw, not just bits": exploration of healthcare
- 22 professionals' beliefs towards supported self-management for long-term conditions. *BMC*
- 23 *Psychol* 2019;7(1):38.
- 24
- 25 23. Ladds E RA, Wieringa S, Taylor S, Rayner C, Husain L, Greenhalgh T,. Developing services for long
- 26 COVID: lessons from a study of wounded healers. *Clin Med J* 2021 [published Online First:
- 27 Jan 2021]
- 28
- 29 24. Barker-Davies RM OSO, Senaratne KPP, Baker P, Cranley M, Dharm-Datta S, Ellis H, Goodall D,
- 30 Gough M, Lewis S, Norman J, Papadopoulou T, Roscoe D, Sherwood D, Turner P, Walker T,
- 31 Mistlin A, Phillip R, Nicol AM, Bennett AN, Bahadur S,. The Stanford Hall consensus
- 32 statement for post-COVID-19 rehabilitation. *Br J Sports Med* 2020;54(16):949-59.
- 33
- 34 25. Sivan M HS, Hollingworth L, Snook N, Hickman K, Clifton IJ,. Development of an integrated
- 35 rehabilitation pathway for individuals recovering from COVID-19 in the community. *J Rehabil*
- 36 *Med* 2020;52(8):jrm00089.
- 37
- 38 26. Thomas EE HH, Mehrotra A, Snoswell L, Banbury A, Smith AC,. Building on the momentum:
- 39 sustaining telehealth beyond COVID-19. *J Telemed Telecare* 2020 [published Online First: 26
- 40 Sept 2020]
- 41
- 42 27. Moore L BN, Lydahl D, Naldemirci O, Elam M, Wolf A,. Barriers and facilitators to the
- 43 implementation of person-centred care in different healthcare contexts. *Scand J Caring Sci*
- 44 *2017;31(4):662-73*.
- 45
- 46 28. Majid U VM. Appraising qualitative research for evidence syntheses: a compendium of quality
- 47 appraisal tools. *Qual Health Res* 2018;28(13):2115-31.
- 48
- 49
- 50
- 51
- 52
- 53
- 54
- 55
- 56
- 57
- 58
- 59
- 60

## FIGURES AND TABLES

Figure 1 PRISMA flow diagram of study selection

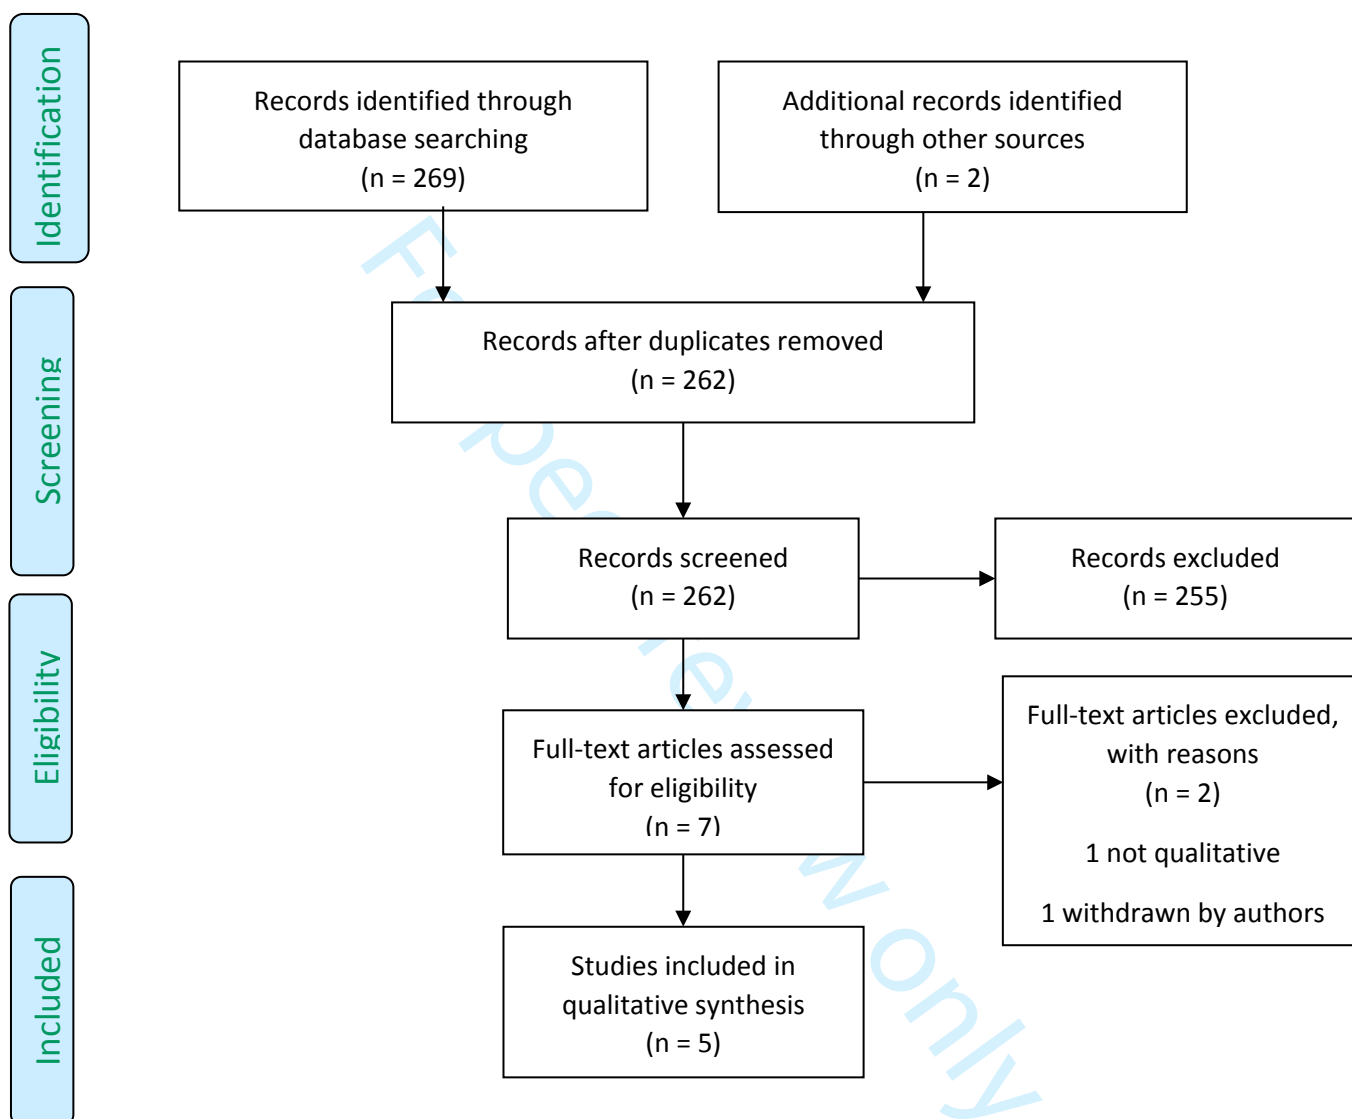

Figure 2 Map of analytical and descriptive themes from the analysis

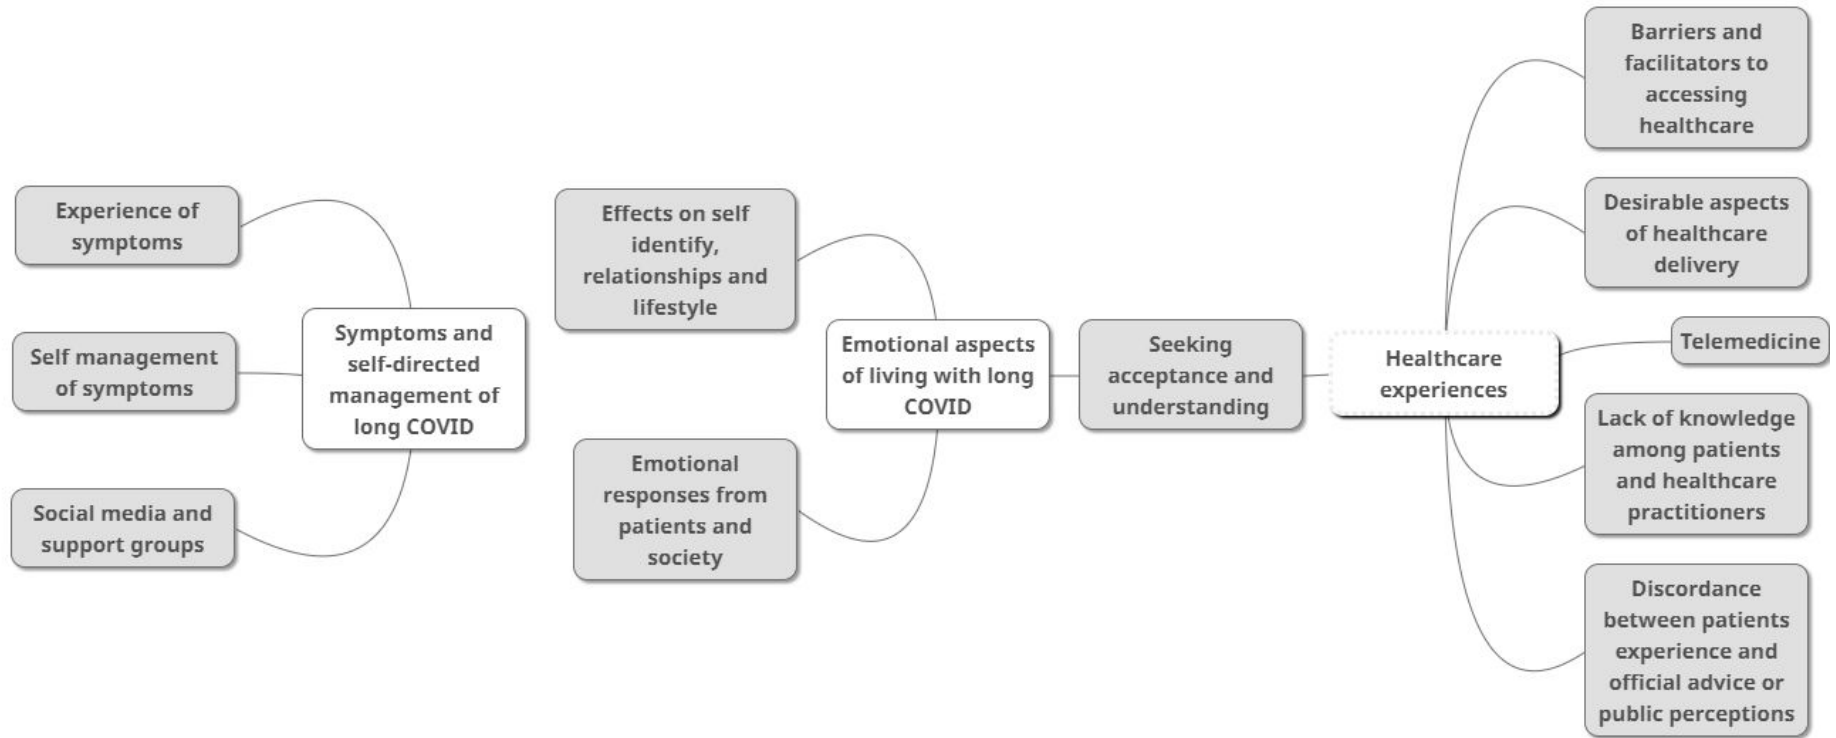

1  
2  
3  
4  
5  
6  
7  
8  
9  
10  
11  
12  
13  
14  
15  
16  
17  
18  
19  
20  
21  
22  
23  
24  
25  
26  
27  
28  
29  
30  
31  
32  
33  
34  
35  
36  
37  
38  
39  
40  
41  
42  
43  
44  
45  
46

**Table 1 Characteristics of included studies**

| Study [country]                                             | Study methods and setting                                                                                                                              | Participant characteristics and sample size                                                                                          | Main Results                                                                                                                                                                                                                                                                                                                        |
|-------------------------------------------------------------|--------------------------------------------------------------------------------------------------------------------------------------------------------|--------------------------------------------------------------------------------------------------------------------------------------|-------------------------------------------------------------------------------------------------------------------------------------------------------------------------------------------------------------------------------------------------------------------------------------------------------------------------------------|
| Assaf <i>et al.</i> (2020) <sup>19</sup><br>[Multinational] | Online survey 21 Apr - 2 May 2020 circulated to long COVID support groups and through social media<br><br>Quantitative and qualitative data collection | n=640<br><br>Patients with symptoms lasting >2 weeks<br><br>62.7% aged 30-49; 76.0% white; 76.6% female                              | Cyclical symptoms experienced unexpectedly for ≥6 weeks<br><br>Stigma experienced by patients with long-Covid<br><br>Impacts on lifestyle, including physical activity<br><br>Dismissed or misdiagnosed by medical professionals<br><br>Sentiment analysis conducted on satisfaction with medical staff and on sharing experiences. |
| Davis <i>et al.</i> (2020) <sup>16</sup><br>[Multinational] | Online survey 6 Sept – 25 Nov 2020 circulated to online patients support groups and social media<br><br>Quantitative and qualitative data collection   | n=3,762<br><br>Patients with symptoms lasting >28 days<br><br>60.8% aged 40-59; 85.3% white; 78.9% female                            | Patients with Long Covid reported prolonged multisystem involvement and significant disability.<br><br>The most frequent symptoms reported after 6 months were:<br><br>fatigue<br><br>post-exertional malaise<br><br>cognitive dysfunction.                                                                                         |
| Kingstone <i>et al.</i> (2020) <sup>17</sup><br>[UK]        | Recruitment through social media (Twitter or Facebook) and snowball sampling Jul - Aug 2020<br><br>Semi-structured interviews by telephone or video    | n=24<br><br>Self-reported persistent symptoms following acute COVID-19 illness<br>Age range 20-68; 87.5% white British; 79.2% female | Four key themes reported in results:<br><br>'hard and heavy work' of enduring and managing symptoms, trying to find answers, and accessing care<br><br>living with uncertainty and fear                                                                                                                                             |

|                                               |                                                                                                                                                  |                                                                                                                                                                         |                                                                                                                                                                                                                                                    |
|-----------------------------------------------|--------------------------------------------------------------------------------------------------------------------------------------------------|-------------------------------------------------------------------------------------------------------------------------------------------------------------------------|----------------------------------------------------------------------------------------------------------------------------------------------------------------------------------------------------------------------------------------------------|
|                                               | call (duration 35-90 minutes)<br>Thematic analysis using principles of constant comparison                                                       |                                                                                                                                                                         | importance of finding the 'right' GP<br><br>recovery and rehabilitation: what would help?                                                                                                                                                          |
| Ladds <i>et al.</i> (2020) <sup>18</sup> [UK] | Individual narrative interview (telephone or video) or participation in an online focus group<br><br>Constant comparison method of data analysis | Total n = 114<br><br>55 interviews (40 female/15 male); median age 48 (range 31-68)<br><br>59 focus group participants (40 female/19 male); median age 43 (range 27-73) | Five key themes reported in results:<br><br>the illness experience,<br><br>accessing care,<br><br>relationships (or lack of) with clinicians,<br><br>emotional touchpoints in encounters with health services,<br><br>ideas for improving services |
| Maxwell (2020) <sup>1</sup> [UK]              | Focus group of COVID-19 Facebook group members                                                                                                   | Not reported                                                                                                                                                            | Four key themes reported in results:<br><br>expectations,<br><br>symptom journey,<br><br>being doubted,<br><br>support                                                                                                                             |

Table 2 CASP critical appraisal of using the checklist for qualitative studies

|                                                       | <b>Assaf et al.<sup>19</sup></b> | <b>Kingston et al.<sup>17</sup></b> | <b>Ladds et al.<sup>18</sup></b> | <b>Maxwell<sup>1</sup></b> | <b>Davis et al.<sup>16</sup></b> |
|-------------------------------------------------------|----------------------------------|-------------------------------------|----------------------------------|----------------------------|----------------------------------|
| <b>Clear aims statement</b>                           | Y                                | Y                                   | Y                                | N                          | Y                                |
| <b>Appropriate methodology</b>                        | U                                | Y                                   | Y                                | Y                          | Y                                |
| <b>Appropriate research design</b>                    | U                                | Y                                   | Y                                | U                          | Y                                |
| <b>Appropriate recruitment</b>                        | Y                                | Y                                   | Y                                | U                          | Y                                |
| <b>Appropriate data collection</b>                    | U                                | Y                                   | Y                                | U                          | Y                                |
| <b>Researcher-participant relationship considered</b> | N                                | U                                   | U                                | U                          | U                                |
| <b>Ethical issues considered</b>                      | U                                | Y                                   | Y                                | U                          | Y                                |
| <b>Rigorous data analysis</b>                         | U                                | Y                                   | Y                                | N                          | U                                |
| <b>Clear statement of findings</b>                    | U                                | Y                                   | Y                                | Y                          | Y                                |

Y=criterion satisfied; N=criterion not satisfied; U=unclear if criterion satisfied

1  
2  
3  
4  
5  
6  
7  
8  
9  
10  
11  
12  
13  
14  
15  
16  
17  
18  
19  
20  
21  
22  
23  
24  
25  
26  
27  
28  
29  
30  
31  
32  
33  
34  
35  
36  
37  
38  
39  
40  
41  
42  
43  
44  
45  
46  
47  
48  
49  
50  
51  
52  
53  
54  
55  
56  
57  
58  
59  
60

For peer review only



## SUPPLEMENTARY MATERIAL

### Supplementary file 1 Inclusion criteria

| Criteria              | Notes                                                                                                                                                                                                                                                    |
|-----------------------|----------------------------------------------------------------------------------------------------------------------------------------------------------------------------------------------------------------------------------------------------------|
| Population            | Adults and children experiencing new or ongoing symptoms: <ul style="list-style-type: none"> <li>• 4–12 weeks from onset of acute COVID-19 illness</li> <li>• 12 weeks from onset of acute COVID-19 illness</li> </ul>                                   |
| Phenomena of interest | Signs and symptoms of post-COVID-19 syndrome<br>Access to services<br>How symptoms were assessed<br>Management of symptoms and rehabilitation<br>Patient care pathway<br>Information and support provided<br>Communication with healthcare professionals |
| Comparators           | Not applicable                                                                                                                                                                                                                                           |
| Outcomes              | The outcomes will be generated using emergent coding, but are expected to include experiences, views and perceptions of individuals, families or carers on the factors of interest listed (such as Patient Reported Experience Measures)                 |
| Settings              | Any                                                                                                                                                                                                                                                      |
| Sub-groups            | Equality groups, for example, age, gender, ethnicity<br>Diagnosis of COVID-19 (e.g. confirmed or high clinical suspicion)<br>Duration of symptoms                                                                                                        |
| Study types           | Systematic reviews of qualitative studies<br>Qualitative studies that collect data from focus groups or interviews<br>Studies that collect qualitative data from questionnaires / surveys<br>Mixed method study designs (including qualitative element)  |
| Countries             | Any                                                                                                                                                                                                                                                      |
| Timepoints            | Any                                                                                                                                                                                                                                                      |
| Other exclusions      | None                                                                                                                                                                                                                                                     |

1  
2  
3 **Supplementary file 2 Sources searched and MEDLINE search strategy**  
4  
5

|    |                                                                    |
|----|--------------------------------------------------------------------|
| 6  | <b>UK national health service and government websites</b>          |
| 7  | <a href="#">Public Health England</a>                              |
| 8  | <a href="#">Public Health Scotland</a>                             |
| 9  | <a href="#">Scottish Government</a>                                |
| 10 | <a href="#">UK Government</a>                                      |
| 11 | <b>National/international policy sources</b>                       |
| 12 | <a href="#">European Centre for Disease Control</a>                |
| 13 | <a href="#">Health Protection Scotland COVID-19 Compendium</a>     |
| 14 | <b>Guidelines</b>                                                  |
| 15 | <a href="#">National Institute of Health</a>                       |
| 16 | <a href="#">NICE</a>                                               |
| 17 | <a href="#">SIGN</a>                                               |
| 18 | <b>Evidence summaries and collections</b>                          |
| 19 | <a href="#">Analytical Collaboration for COVID-19</a>              |
| 20 | <a href="#">Cochrane Special Collection</a>                        |
| 21 | <a href="#">COVID-19 Best Evidence Front Door</a>                  |
| 22 | <a href="#">COVID-19 Evidence Reviews</a>                          |
| 23 | <a href="#">Evidence Aid Collection</a>                            |
| 24 | <a href="#">McMaster rapid review database</a>                     |
| 25 | <a href="#">Oxford Centre for Evidence-Based Medicine</a>          |
| 26 | <b>HTAs</b>                                                        |
| 27 | <a href="#">ECRI</a>                                               |
| 28 | <a href="#">Health Technology Wales</a>                            |
| 29 | <a href="#">National Institute for Health Research</a>             |
| 30 | <a href="#">NICE</a>                                               |
| 31 | <b>Specialist Databases</b>                                        |
| 32 | <a href="#">Epistemonikos</a>                                      |
| 33 | <a href="#">EPPI Centre: living systematic map of the evidence</a> |
| 34 | <a href="#">ProQuest</a>                                           |
| 35 | <a href="#">PubMed LitCovid</a>                                    |
| 36 | <a href="#">WHO database of publications</a>                       |
| 37 | <b>Preprints</b>                                                   |
| 38 | <a href="#">bioRxiv</a>                                            |
| 39 | <a href="#">medRxiv</a>                                            |
| 40 | <b>Research centres/organisations</b>                              |
| 41 | <a href="#">Campbell Collaboration</a>                             |
| 42 | <a href="#">Centre for Qualitative Research</a>                    |
| 43 | <a href="#">Health Foundation</a>                                  |
| 44 | <a href="#">King's Fund</a>                                        |
| 45 | <b>Patient issues</b>                                              |
| 46 | <a href="#">Carers UK</a>                                          |
| 47 | <a href="#">Health Talk</a>                                        |
| 48 | <a href="#">Involve</a>                                            |
| 49 | <a href="#">James Lind Alliance</a>                                |
| 50 |                                                                    |
| 51 |                                                                    |
| 52 |                                                                    |
| 53 |                                                                    |
| 54 |                                                                    |
| 55 |                                                                    |
| 56 |                                                                    |
| 57 |                                                                    |
| 58 |                                                                    |
| 59 |                                                                    |
| 60 |                                                                    |

|                                                                |
|----------------------------------------------------------------|
| <a href="#">King's Fund Patient Experience Blog</a>            |
| <a href="#">National Association for Patient Participation</a> |
| <a href="#">National Voices</a>                                |
| <a href="#">Our Covid Voices</a>                               |
| <a href="#">Patient UK Discussion Forums</a>                   |
| <a href="#">Patient Views</a>                                  |
| <a href="#">Patient Voices</a>                                 |
| <a href="#">Patients Association</a>                           |
| <a href="#">Picker Institute</a>                               |
| <b>Primary literature (bibliographic databases)</b>            |
| <a href="#">MEDLINE</a>                                        |
| <a href="#">PsycINFO</a>                                       |
| <a href="#">Web of Science</a>                                 |

### Medline search strategy

- 1 exp coronavirus/
- 2 exp Coronavirus Infections/
- 3 ((corona\* or corono\*) adj1 (virus\* or viral\* or virinae\*)).ti,ab,kw,kf.
- 4 (coronavirus\* or coronavirus\* or coronavirinae\* or CoV).ti,ab,kw,kf.
- 5 ("2019-nCoV" or 2019nCoV or nCoV2019 or "nCoV-2019" or "COVID-19" or COVID19 or "CORVID-19" or CORVID19 or "WN-CoV" or WNCov or "HCoV-19" or HCoV19 or "2019 novel\*" or Ncov or "n-cov" or "SARS-CoV-2" or "SARSCoV-2" or "SARSCoV2" or "SARS-CoV2" or SARSCov19 or "SARS-Cov19" or "SARSCov-19" or "SARS-Cov-19" or Ncover or Ncorona\* or Ncorono\* or NcovWuhan\* or NcovHubei\* or NcovChinese\* or SARS2 or "SARS-2" or SARSCoronavirus2 or "SARS-coronavirus-2" or "SARSCoronavirus 2" or "SARS coronavirus2" or SARSCoronavirus2 or "SARS-coronavirus-2" or "SARSCoronavirus 2" or "SARS coronavirus2").ti,ab,kw,kf.
- 6 (((respiratory\* adj2 (symptom\* or disease\* or illness\* or condition\*)) or "seafood market\*" or "food market\*" or pneumonia\*) adj10 (Wuhan\* or Hubei\* or China\* or Chinese\* or Huanan\*)).ti,ab,kw,kf.
- 7 ((outbreak\* or wildlife\* or pandemic\* or epidemic\*) adj1 (China\* or Chinese\* or Huanan\*)).ti,ab,kw,kf.
- 8 "severe acute respiratory syndrome\*".ti,ab,kw,kf.
- 9 SARS Virus/
- 10 ("SARSCoV" or "SARS-CoV" or "SARS Cov" or SARSCoronavirus or "SARS-coronavirus" or "SARS coronavirus" or SARSCoronavirus or "SARS-coronavirus" or "SARS coronavirus").ti,ab,kw,kf.
- 11 Middle East Respiratory Syndrome Coronavirus/
- 12 "Middle East\* respiratory syndrome".ti,ab,kw,kf.
- 13 ("MERSCoV" or "MERS-CoV" or "MERS Cov" or MERSCoronavirus or "MERS - coronavirus" or "MERS coronavirus" or MERSCoronavirus or "MERS-coronavirus" or "MERS Coronavirus" or "camel flu").ti,ab,kw,kf.
- 14 or/1-13
- 15 exp Patient Satisfaction/
- 16 ((patient\* or carer\* or family) adj2 (experience\* or view\* or perspective\* or preference\* or attitude\* or expectation\* or satisfaction)).tw.

1  
2  
3  
4  
5  
6  
7  
8  
9  
10  
11  
12  
13  
14  
15  
16  
17  
18  
19  
20  
21  
22  
23  
24  
25  
26  
27  
28  
29  
30  
31  
32  
33  
34  
35  
36  
37  
38  
39  
40  
41  
42  
43  
44  
45  
46  
47  
48  
49  
50  
51  
52  
53  
54  
55  
56  
57  
58  
59  
60

17 15 or 16  
18 14 and 17

For peer review only

1  
2  
3  
4  
5  
6  
7  
8  
9  
10  
11  
12  
13  
14  
15  
16  
17  
18  
19  
20  
21  
22  
23  
24  
25  
26  
27  
28  
29  
30  
31  
32  
33  
34  
35  
36  
37  
38  
39  
40  
41  
42  
43  
44  
45  
46

**Supplementary file 3 Summary of key themes relating to the views and experiences of patients, their families and carers**

| Themes and sub-themes                     | Summary of sub-themes                                                                                  | Supporting example                                                                                                                                                                                                                                                                                                                                                                                                                                                                                                                                                        |
|-------------------------------------------|--------------------------------------------------------------------------------------------------------|---------------------------------------------------------------------------------------------------------------------------------------------------------------------------------------------------------------------------------------------------------------------------------------------------------------------------------------------------------------------------------------------------------------------------------------------------------------------------------------------------------------------------------------------------------------------------|
| <b>Theme: experience of symptoms</b>      |                                                                                                        |                                                                                                                                                                                                                                                                                                                                                                                                                                                                                                                                                                           |
| Range of symptoms                         | Patients described a wide range of symptoms, not all of which were recognised as symptoms of COVID-19. | <p>“The symptoms were like a game of whack-a-mole. Different ones would surge at different times and in different places in my body.” (Assaf <i>et al</i>)<sup>19</sup></p> <p>“From week four I started to get chest pains and then breathlessness, gradually other symptoms developed including dry mouth, sore tongue, joint pains, fatigue, rash and tachycardia.” (Maxwell)<sup>1</sup></p>                                                                                                                                                                          |
| Severity of symptoms                      | Symptoms ranged from mild to potentially life-threatening.                                             | <p>“I've been absolutely floored... I've got all sorts of... I've got vasculitis, which I think is a common thing... And I've been left with nerve issues, like really horrible nerve... stabbing pains in my hands and feet and I can't move my toes any more... unfortunately, my journey is far from over.” (Ladds <i>et al</i>)<sup>18</sup></p> <p>“From week four I started to get chest pains and then breathlessness, gradually other symptoms developed including dry mouth, sore tongue, joint pains, fatigue, rash and tachycardia.” (Maxwell)<sup>1</sup></p> |
| Duration and lingering nature of symptoms | Symptoms were experienced for a prolonged but variable length of time.                                 | “He was sleeping for about 20 hours a day, 20 hours out of every 24 and he's still sleeping now, five and half months after, he still sleeps an awful lot, sat up, not lay down, sat up, he's just totally exhausted.” (Kingstone <i>et al</i> ) <sup>17</sup>                                                                                                                                                                                                                                                                                                            |

| Themes and sub-themes                                                                           | Summary of sub-themes                                                                                                                                                                                                                                                                           | Supporting example                                                                                                                                                                                                                                                                                                                                                                                                                                 |
|-------------------------------------------------------------------------------------------------|-------------------------------------------------------------------------------------------------------------------------------------------------------------------------------------------------------------------------------------------------------------------------------------------------|----------------------------------------------------------------------------------------------------------------------------------------------------------------------------------------------------------------------------------------------------------------------------------------------------------------------------------------------------------------------------------------------------------------------------------------------------|
| Fluctuating or cumulative nature of symptoms                                                    | Patients described symptoms 'coming and going', and of new symptoms being added to existing ones over time.                                                                                                                                                                                     | "...From week four I started to get chest pains and then breathlessness, gradually other symptoms developed .... The following weeks were frightening as symptoms fluctuated; sometimes thinking that you were improving and then very disheartening when they returned.... After nearly 6 months I have started to feel some improvement, although doing anything remotely physical results in a flare up of symptoms...." (Maxwell) <sup>1</sup> |
| <b>Theme: discordance between patient experiences and official advice or public perceptions</b> |                                                                                                                                                                                                                                                                                                 |                                                                                                                                                                                                                                                                                                                                                                                                                                                    |
| Disconnect between official advice and lived experience                                         | Patients found official advice on graded exercise and when to come out of isolation unhelpful and contrary to their lived experience of long COVID.                                                                                                                                             | "Well, one of the things that really bugged me about it was the talking about graded exercise and I've learnt from experience that pushing myself even a tiny bit has massive consequences ..." (Kingstone <i>et al</i> , p6) <sup>17</sup>                                                                                                                                                                                                        |
| Disconnect between public perception ("labels") and lived experience                            | The perception that COVID-19 is a binary illness that is either 'mild' or very serious (requiring hospitalisation) was unhelpful and contrasted with patient experience.                                                                                                                        | "So, COVID-19, it's either a mild infection or you die? No. But no one is prepared to think about us." (Kingstone <i>et al</i> ) <sup>2</sup><br><br>"I think the term "mild" should be removed... I know that people who were admitted to the hospital were worse, but we who stayed home did not have MILD cases in all cases" (Maxwell) <sup>1</sup>                                                                                            |
| Disconnect between expected/official timeframes and lived experience                            | Patients expected COVID-19 to last approximately 2 weeks, in line with official estimates, and were then confronted by much longer-term illness. Patients experiencing symptoms beyond the 2-week period are often diagnosed with an alternative condition that more neatly fits the timeframe. | "I went back to work too soon and wish I hadn't. Finally had to take a 5 week break in July/ August with the support of my employer. This helped a lot. I have now been back at work for 5 weeks and my symptoms have got worse to a degree." (Davis <i>et al</i> ) <sup>16</sup>                                                                                                                                                                  |

| Themes and sub-themes                                                            | Summary of sub-themes                                                                                                                                                                     | Supporting example                                                                                                                                                                                                                                                                                                                                                                                                                                                                                                                                                                                                                                                                                                                                                                                                                             |
|----------------------------------------------------------------------------------|-------------------------------------------------------------------------------------------------------------------------------------------------------------------------------------------|------------------------------------------------------------------------------------------------------------------------------------------------------------------------------------------------------------------------------------------------------------------------------------------------------------------------------------------------------------------------------------------------------------------------------------------------------------------------------------------------------------------------------------------------------------------------------------------------------------------------------------------------------------------------------------------------------------------------------------------------------------------------------------------------------------------------------------------------|
| Disconnect between officially recognised symptoms and lived experience           | There is discordance between the range of symptoms articulated by patients with long-term illness and those officially recognised by authorities as COVID-19.                             | “If the message hadn’t been [to expect to recover in] around two weeks, I’d have been more cautious at first, ... the doctor I saw in A/E described Covid as the gift that keeps on giving and at four weeks I thought that felt like a long time, and now five months on it feels like a very long time” (Maxwell, p11) <sup>1</sup>                                                                                                                                                                                                                                                                                                                                                                                                                                                                                                          |
| Impact of disconnect between officially recognised symptoms and lived experience | As a consequence of the mismatch between officially recognised symptoms and lived experience of long COVID, patients feel ignored, dismissed, and may be misdiagnosed.                    | “Despite having been diagnosed with suspected Covid by my GP and a doctor in a Covid clinic (swab testing wasn’t available to the public at the time) and told I had pleurisy during a visit to A&E two weeks earlier, the doctor on duty didn’t take this into account. Instead, he dismissed me with anxiety, advising a course of anti-depressants, and chose not to investigate these concerning symptoms further. Of course I was anxious, but that was a consequence of the physical symptoms, not the cause! I would later learn from a neurologist that what I experienced on that day were clear neurological symptoms that should have been investigated promptly. To be brushed off like this when so little was known at the time of the damage Covid can cause was disheartening and very upsetting.” (Maxwell, p15) <sup>1</sup> |
| <b>Theme: self management of symptoms</b>                                        |                                                                                                                                                                                           |                                                                                                                                                                                                                                                                                                                                                                                                                                                                                                                                                                                                                                                                                                                                                                                                                                                |
| Self care and lifestyle adjustment                                               | Patients attempted various forms of self care, such as taking supplements, and made adjustments to their lifestyle, for example by reducing physical activity, to accommodate long COVID. | “I mean initially I started taking vitamin D. Had a joint vitamin C and zinc thing, which I didn’t take every day but I took some multivitamins, but then I was a bit unsure really ... my husband’s quite anti-vitamin use ... So anyway, then I took nothing for a while, and then I more recently started the vitamin D again, and I’m on                                                                                                                                                                                                                                                                                                                                                                                                                                                                                                   |

| Themes and sub-themes                                       | Summary of sub-themes                                                                                                                                                                    | Supporting example                                                                                                                                                                                                                                                                                              |
|-------------------------------------------------------------|------------------------------------------------------------------------------------------------------------------------------------------------------------------------------------------|-----------------------------------------------------------------------------------------------------------------------------------------------------------------------------------------------------------------------------------------------------------------------------------------------------------------|
|                                                             |                                                                                                                                                                                          | B12 just because of all the burning in my feet ... and a probiotic and some omega-3." (Kingstone <i>et al</i> ) <sup>17</sup>                                                                                                                                                                                   |
| Pacing and goal setting                                     | The importance of pacing yourself and setting realistic goals was highlighted by patients.                                                                                               | "...I really have to pace myself... I couldn't do two or three household chores back to back, I have to do a chore, sit down for 15, 20 minutes and then do the next, which frustrates me...." (Kingstone <i>et al</i> ) <sup>17</sup>                                                                          |
| <b>Theme: emotional responses from patients and society</b> |                                                                                                                                                                                          |                                                                                                                                                                                                                                                                                                                 |
| Helplessness                                                | Long-term symptoms were associated with a feeling of helplessness.                                                                                                                       | "Most participants continued the discussion after the digital recorder was turned off, emphasising their own feelings of helplessness, but also alluding to the uncertainty and helplessness that GPs had admitted to" (Kingstone <i>et al</i> ) <sup>17</sup> [Author quote]                                   |
| Anxiety                                                     | Patients described anxiety about the prospect of not recovering, uncertainty over the cause of symptoms, not being believed, and some of the content they read on online support groups. | "... I was really frightened, terrified and just thought I might die on a couple of occasions ... maybe not "I'm going to die right now", but definitely "I'm never going to get better from this" kind of feeling." (Kingstone <i>et al</i> ) <sup>17</sup>                                                    |
| Relief                                                      | A sense of relief was associated with finding a healthcare professional that believed the patient.                                                                                       | "I finally found a GP who took me seriously last Saturday when I was at the point of crying talking to her, just understanding that people's symptoms are real and diverse." (Maxwell) <sup>1</sup>                                                                                                             |
| Stigma (externally generated)                               | Employers and others drive a fear of being stigmatised over long COVID.                                                                                                                  | "Healthcare staff was fearful and I was turned away with no support" (Assaf <i>et al</i> ) <sup>19</sup><br><br>"I had to take two weeks off, had to work from home for four, but had to return for two weeks with fever as my employer would not give me more time [...]." (Davis <i>et al</i> ) <sup>16</sup> |



| Themes and sub-themes                                               | Summary of sub-themes                                                                                                                                   | Supporting example                                                                                                                                                                                                                                                                                                                                                                                                                                                                                                                                                                                                                                                                                    |
|---------------------------------------------------------------------|---------------------------------------------------------------------------------------------------------------------------------------------------------|-------------------------------------------------------------------------------------------------------------------------------------------------------------------------------------------------------------------------------------------------------------------------------------------------------------------------------------------------------------------------------------------------------------------------------------------------------------------------------------------------------------------------------------------------------------------------------------------------------------------------------------------------------------------------------------------------------|
| Stigma (internally generated)                                       | Patients experienced a sense of shame and blame consistent with stigma.                                                                                 | "Fearful of people around me finding out and overreacting / treating me differently" (Assaf <i>et al</i> ) <sup>19</sup>                                                                                                                                                                                                                                                                                                                                                                                                                                                                                                                                                                              |
| <b>Theme: effects on self-identity, relationships and lifestyle</b> |                                                                                                                                                         |                                                                                                                                                                                                                                                                                                                                                                                                                                                                                                                                                                                                                                                                                                       |
| Impact on self-identify                                             | Long COVID affected self identity as a healthy, independent individual, and resulted in patients comparing themselves with a pre-COVID version of self. | "I have not had strength to return to physical activity. I did work in my house and 2 days later had a fever again after being 12 days fever free." (Assaf <i>et al</i> ) <sup>19</sup>                                                                                                                                                                                                                                                                                                                                                                                                                                                                                                               |
| Impact on daily life/work                                           | Patients had to alter their physical activity levels to accommodate long COVID and found cognitive symptoms prevented a return to work.                 | <p>"I'm trapped, in that I can't park that far away and walk [to the shops] like I normally would because I can't do hills. I can just, in the last couple of weeks, I can do gentle inclines now, but I sort of grind to a halt on a hill. So, it's very limiting." (Ladds <i>et al</i>)<sup>18</sup></p> <p>"I wasn't just fogged, I was confused. I had a very difficult encounter as a result of just being confused about things and that took a long time to resolve. I love words and I enjoy the business of communicating, and I felt that part of my life was lost. Really, I just did admin, I didn't do anything that required clear thinking." (Kingstone <i>et al</i>)<sup>17</sup></p> |
| Impact on self - reduced confidence                                 | There was a sense of loss of confidence in professional abilities among some patients.                                                                  | "Doctors and other clinicians .... described how their symptoms and the accompanying prognostic uncertainty .... had also stripped them of confidence in their professional abilities." (Ladds <i>et al</i> ) <sup>18</sup> [Author quote]                                                                                                                                                                                                                                                                                                                                                                                                                                                            |
| Impact on others/relationships                                      | Long COVID had an impact on family members as well as patients.                                                                                         | "I think, at first, they just thought, "Oh, for god's sake, she's napping again." I feel like I constantly have to explain. I'm just exhausted and I just want to know why I'm so exhausted .... I used to enjoy running, and                                                                                                                                                                                                                                                                                                                                                                                                                                                                         |

| Themes and sub-themes                                       | Summary of sub-themes                                                                                       | Supporting example                                                                                                                                                                                                                                                                                                                                                                                                                                                                                                                                                                                                                                                                                                                                                                                                                                                                                                                                                                                                                                                                                                                                                    |
|-------------------------------------------------------------|-------------------------------------------------------------------------------------------------------------|-----------------------------------------------------------------------------------------------------------------------------------------------------------------------------------------------------------------------------------------------------------------------------------------------------------------------------------------------------------------------------------------------------------------------------------------------------------------------------------------------------------------------------------------------------------------------------------------------------------------------------------------------------------------------------------------------------------------------------------------------------------------------------------------------------------------------------------------------------------------------------------------------------------------------------------------------------------------------------------------------------------------------------------------------------------------------------------------------------------------------------------------------------------------------|
|                                                             |                                                                                                             | exercising, and stuff like that. I rarely even go on walks now because I know if I walk to the end of the street, they're [lungs] going to start hurting." (Kingstone <i>et al</i> ) <sup>17</sup>                                                                                                                                                                                                                                                                                                                                                                                                                                                                                                                                                                                                                                                                                                                                                                                                                                                                                                                                                                    |
| <b>Theme: healthcare access – barriers and facilitators</b> |                                                                                                             |                                                                                                                                                                                                                                                                                                                                                                                                                                                                                                                                                                                                                                                                                                                                                                                                                                                                                                                                                                                                                                                                                                                                                                       |
| Barrier - testing                                           | Challenges were experienced with accessing testing (for long-term symptoms or COVID-19 diagnostic testing). | "... My worst and scariest experience with this illness was in week 6, when I was rushed to A&E as I had a sudden relapse of symptoms and found myself gasping for air, with the top of my head numb and tingling and a headache so blinding that I couldn't keep my eyes open. I got worse in the hospital and was shaking visibly, so much so that the nurse couldn't perform an ECG as I just couldn't stay still. Despite having been diagnosed with suspected Covid by my GP and a doctor in a Covid clinic (swab testing wasn't available to the public at the time) and told I had pleurisy during a visit to A&E two weeks earlier, the doctor on duty didn't take this into account. Instead, he dismissed me with anxiety, advising a course of anti-depressants, and chose not to investigate these concerning symptoms further. ....I would later learn from a neurologist that what I experienced on that day were clear neurological symptoms that should have been investigated promptly. To be brushed off like this when so little was known at the time of the damage Covid can cause was disheartening and very upsetting." (Maxwell) <sup>1</sup> |

| Themes and sub-themes                                   | Summary of sub-themes                                                                                                                                                      | Supporting example                                                                                                                                                                                                                                                                                                                                                                                                                                     |
|---------------------------------------------------------|----------------------------------------------------------------------------------------------------------------------------------------------------------------------------|--------------------------------------------------------------------------------------------------------------------------------------------------------------------------------------------------------------------------------------------------------------------------------------------------------------------------------------------------------------------------------------------------------------------------------------------------------|
| Barrier – primary care                                  | Difficulties accessing primary care, particularly face-to-face or through the ‘total triage’ system were a barrier to healthcare access                                    | “I was initially contacting a certain GP, and that GP literally just went “you need to stay at home and rest, there’s nothing we can do”, a.....so I started contacting a different GP, in the same practice, and it’s the same outcome, they can’t do anything else but he seems to be interested and wants to know what’s going on.” (Kingstone <i>et al</i> ) <sup>17</sup>                                                                         |
| Barrier – effort involved                               | Accessing healthcare was complex, difficult and exhausting for patients.                                                                                                   | “One day I had blue finger nails and I wasn’t cold .... and I phoned the GP and the GP answer phone said if you’ve got any of the signs of, of Covid please ring 111 and so I rang 111 and, I live in [city with high incidence of Covid-19] I don’t know if that makes any difference but I was put on hold and after over an hour, an hour and twenty minutes nobody answered so I just put the phone down ....” (Ladds <i>et al</i> ) <sup>18</sup> |
| Barrier – specialist referral                           | Few patients managed to obtain a referral to a specialist.                                                                                                                 | “...three of the referrals my GP made (two respiratory and one neurology) were refused by two different hospitals on the grounds that a) they only checked Covid confirmed patients b) that they needed extra tests which weren’t done on me at A&E” (Maxwell) <sup>1</sup>                                                                                                                                                                            |
| Perceived barrier – healthcare professionals being busy | There was a perception that healthcare professionals are too busy caring for patients with acute COVID-19 to be able to provide care for patients with long-term symptoms. | “At this point, most physicians and researchers are so overwhelmed treating the covid19 patients who are at risk of immediate death, that they don’t have the ability to even recognize that people like me exist....” (Assaf <i>et al</i> ) <sup>19</sup><br><br>“I think the message to avoid hospital and the GP unless you had specific symptoms was very unhelpful,                                                                               |

| Themes and sub-themes                                 | Summary of sub-themes                                                                                                                                                                                                                                                                                                                                                                                                                                            | Supporting example                                                                                                                                                                                                                                                                                                                                                                                    |
|-------------------------------------------------------|------------------------------------------------------------------------------------------------------------------------------------------------------------------------------------------------------------------------------------------------------------------------------------------------------------------------------------------------------------------------------------------------------------------------------------------------------------------|-------------------------------------------------------------------------------------------------------------------------------------------------------------------------------------------------------------------------------------------------------------------------------------------------------------------------------------------------------------------------------------------------------|
|                                                       |                                                                                                                                                                                                                                                                                                                                                                                                                                                                  | particularly as I didn't have, and never have had, a cough or fever" (Maxwell) <sup>1</sup>                                                                                                                                                                                                                                                                                                           |
| Perceived barrier – healthcare entitlement            | Patients had a perception that they were not entitled to healthcare for long-term symptoms of COVID-19.                                                                                                                                                                                                                                                                                                                                                          | “...I guess I felt a bit like I was ineligible for health care now. I felt like I'm just going to have to live with this at home and no one will come and see me and, you know, I'm just, yeah. It was a horrible feeling.” (Kingstone <i>et al</i> ) <sup>17</sup>                                                                                                                                   |
| Facilitator – follow-ups & check-ins                  | Regular follow up or check-in with patients with long-term symptoms was viewed as a positive aspect of healthcare.                                                                                                                                                                                                                                                                                                                                               | “... I think for the first five days after I called her she had a daily check in call with me to monitor how I'm doing so it was like a ten minute phone call every day for the first five days” (Ladds <i>et al</i> ) <sup>18</sup>                                                                                                                                                                  |
| Things patients did to access care                    | Patients engaged in a number of activities to improve their access to healthcare including: <ul style="list-style-type: none"> <li>• taking the lead in arranging consultations and "circumventing bottlenecks"</li> <li>• deliberately manipulating inflexible algorithm-driven systems to access referrals</li> <li>• accessing private healthcare to prompt NHS follow up, conducting their own research and constructing their own care pathways.</li> </ul> | “did the e-consult – I had to do it a couple of times – I kind of learned to answer the questions to get it to send a message to my GP surgery... If you say you've got heart palpitations or breathlessness it's telling you to call 111 which I didn't want to do. And so I had to downplay symptoms [laughs] to get through. I cancelled it and did it again.” (Ladds <i>et al</i> ) <sup>18</sup> |
| <b>Theme: telemedicine - limitations and benefits</b> |                                                                                                                                                                                                                                                                                                                                                                                                                                                                  |                                                                                                                                                                                                                                                                                                                                                                                                       |
| Limitation – remote consultation                      | Remote consulting was found to limit access to GPs and to restrict communication of symptoms.                                                                                                                                                                                                                                                                                                                                                                    | “... reassure me are things where I need my body actually checking which I don't think you could check online, you can't check for blood clots online, you can't check for neurological damage online can you?” (Kingstone <i>et al</i> ) <sup>17</sup>                                                                                                                                               |

| Themes and sub-themes                                                                                      | Summary of sub-themes                                                                                       | Supporting example                                                                                                                                                                                                                                                                                                                                                                                                                      |
|------------------------------------------------------------------------------------------------------------|-------------------------------------------------------------------------------------------------------------|-----------------------------------------------------------------------------------------------------------------------------------------------------------------------------------------------------------------------------------------------------------------------------------------------------------------------------------------------------------------------------------------------------------------------------------------|
| Limitation – lack of continuity                                                                            | Loss of continuity of care was particularly impactful on patients with complex presentations.               | “The focus when you do get a new GP speaking to you seems to be that they go back to the beginning ....And I think if there was the same GP who we are able to consult regularly they would build a picture of your baseline and I think that’s what’s lost with digital ways of working.” (Ladds <i>et al</i> ) <sup>18</sup>                                                                                                          |
| Limitation – protocolised care                                                                             | Strict adherence to protocols in the telemedicine context affected patient safety and led to mismanagement. | “... I remembered ringing my GP from the floor on my lounge laying on my front and kind of saying I’m really short of breath, you know, do you think I should try an inhaler do I need to go back to A&E and I was kind of told well you don’t really sound too out of breath over the phone .... I really felt at that point right if you could see me you would see that I am really like broken” (Ladds <i>et al</i> ) <sup>18</sup> |
| Benefits - accessibility                                                                                   | Positive experiences of accessing GPs through telemedicine.                                                 | “My doctor was available via messaging, telephone, and telemedicine. She also contracted COVID-19 so she shared her experience with recovery and it helped me stay calm that I was on the right track.” (Assaf <i>et al</i> ) <sup>19</sup>                                                                                                                                                                                             |
| <b>Theme: lack of knowledge, information and understanding among healthcare professionals and patients</b> |                                                                                                             |                                                                                                                                                                                                                                                                                                                                                                                                                                         |
| Lack of knowledge - healthcare professionals                                                               | There is a perceived lack of knowledge about long COVID among healthcare professionals.                     | “...I think all the way through I found doctors that I've come into contact with are just really at a bit of a loss for it. I think at the beginning, particularly when things were going on, and not clearing up it was kind of put on me as just being a strange case ... and my GP was going, “Well, you're just weird, you know”.’ (Kingstone <i>et al</i> ) <sup>17</sup>                                                          |

| Themes and sub-themes            | Summary of sub-themes                                                                                                                                                                                                                                                                                          | Supporting example                                                                                                                                                                                                                                                                                                                                                                                                                                 |
|----------------------------------|----------------------------------------------------------------------------------------------------------------------------------------------------------------------------------------------------------------------------------------------------------------------------------------------------------------|----------------------------------------------------------------------------------------------------------------------------------------------------------------------------------------------------------------------------------------------------------------------------------------------------------------------------------------------------------------------------------------------------------------------------------------------------|
| Lack of knowledge – symptoms     | The lack of knowledge around long COVID included uncertainty about the expected symptoms, wanting to learn about living with COVID-19, uncertainty about the cause of symptoms, a lack of understanding about the fluctuating nature of symptoms and lack of knowledge about recovery from long-term symptoms. | “None of us knew this [the symptoms] because we’re all on our own, in a little bubble, thinking I’m the only one. Why am I the one who has still got it?” (Maxwell) <sup>1</sup>                                                                                                                                                                                                                                                                   |
| Lack of knowledge – seeking help | Uncertainty about when patients with long COVID should seek medical help.                                                                                                                                                                                                                                      | “...combined with the UK government message to stay away from health services unless very ill, left many people uncertain about when they should seek help.” (Maxwell) <sup>1</sup> [Author quote]                                                                                                                                                                                                                                                 |
| Lack of knowledge – employers    | Employers need advice on how to manage employees with long COVID.                                                                                                                                                                                                                                              | “Advice on the range of symptoms and duration was also needed by employers who are unclear what to expect of those with ongoing effects.” (Maxwell) <sup>1</sup> [Author quote]<br><br>“I have needed more-flexible hours (working remotely) post-COVID. That way, I can rest as needed throughout the day. If I had to return to in-person work at this point, it would be severely reduced hours if at all.” (Davis <i>et al</i> ) <sup>16</sup> |
| Lack of knowledge – management   | Lack of knowledge about managing long COVID, resources available locally for patient rehabilitation, and about recovery from prolonged illness.                                                                                                                                                                | “I finally had a respiratory appointment three months later, over the phone (not over a video link). I was ... recommended graded exercise. When I then saw a rehabilitation physiotherapist, she said no, we are not going to do graded exercise because that would be counterproductive for you. ” (Maxwell) <sup>1</sup>                                                                                                                        |

| Themes and sub-themes                                                                                         | Summary of sub-themes                                                                                                              | Supporting example                                                                                                                                                                                                                                                                                                                                                                                                                               |
|---------------------------------------------------------------------------------------------------------------|------------------------------------------------------------------------------------------------------------------------------------|--------------------------------------------------------------------------------------------------------------------------------------------------------------------------------------------------------------------------------------------------------------------------------------------------------------------------------------------------------------------------------------------------------------------------------------------------|
| Lack of knowledge – prompts help-seeking from other sources                                                   | Lack of widely accessible medical knowledge about long COVID has led to patient reliance on news and social media for information. | “At least I know I'm not alone. And I think people who actually have had the disease tend to know a little bit more about it. So, you know, sixth sense, I actually think that the support group has given more knowledge than the doctors have.” (Ladds <i>et al</i> ) <sup>18</sup>                                                                                                                                                            |
| Patients prefer healthcare professionals to admit uncertainty                                                 | Patients would prefer healthcare professionals to admit to a lack of knowledge about long COVID.                                   | “She just listens a little bit more to what I'm saying and she's much more willing to say, “Of course, we don't really know what's going on because it's a new virus.” She doesn't try to pretend that she understands what's going on, which is good.” (Kingstone <i>et al</i> ) <sup>17</sup>                                                                                                                                                  |
| <b>Theme: desirable features of healthcare services/service delivery</b>                                      |                                                                                                                                    |                                                                                                                                                                                                                                                                                                                                                                                                                                                  |
| Healthcare structuring – one stop clinics with face-to-face assessment of symptoms by multidisciplinary teams | Patients wanted a ‘one-stop’ clinic with multidisciplinary teams there to assess symptoms affecting a wide range of body systems.  | “What would be most helpful is if all main hospitals could have a Covid clinic that had experts from respiratory, cardiology, rheumatology, neurology, physiotherapy etc, so you could go along for half a day and see people from these different departments, they can refer you for tests and you can get a plan in place, We are having such a range of symptoms that GPs are struggling to know what to do with you” (Maxwell) <sup>1</sup> |
| Healthcare structuring – case management                                                                      | A case manager or single clinician to co-ordinate investigations and the patient care pathway for each patient with long COVID.    | “... there was a view that it would be helpful if people living with Covid19 could have a ‘quarter back’ or case manager to oversee and coordinate investigations and support services across different medical specialities.” (Maxwell) <sup>1</sup>                                                                                                                                                                                            |
| Healthcare structuring – MDT rehabilitation                                                                   | Assessment by a multidisciplinary rehabilitation team was proposed.                                                                | “... the British Society of Rehabilitation Medicine notes there are people who were never admitted to hospital but who still have ongoing needs for rehabilitation                                                                                                                                                                                                                                                                               |

| Themes and sub-themes                                                      | Summary of sub-themes                                                                                                                      | Supporting example                                                                                                                                                                                                                                           |
|----------------------------------------------------------------------------|--------------------------------------------------------------------------------------------------------------------------------------------|--------------------------------------------------------------------------------------------------------------------------------------------------------------------------------------------------------------------------------------------------------------|
|                                                                            |                                                                                                                                            | support after recovering from Covid, or Covid-like symptoms." (Maxwell) <sup>1</sup> [Author quote]                                                                                                                                                          |
| Individual - acceptance of patient experiences by healthcare professionals | Empathetic health professionals that accepted patient experiences were desirable to individuals.                                           | "I finally found a GP who took me seriously last Saturday when I was at the point of crying talking to her, just understanding that people's symptoms are real and diverse." (Maxwell) <sup>1</sup>                                                          |
| Individual - practical coping strategies                                   | Patients wanted practical advice on coping strategies.                                                                                     | "... members understood that there were no magic cures, but were looking for practical advice on coping strategies that go beyond basic advice." (Maxwell) <sup>1</sup> [Author quote]                                                                       |
| <b>Theme: social media and support groups</b>                              |                                                                                                                                            |                                                                                                                                                                                                                                                              |
| Support through sharing experiences                                        | Online support groups and social media provided opportunities for sharing experiences of long COVID.                                       | "when I found the Long Covid Facebook group that I realised I wasn't alone, thousands of people were in the same situation. Knowing this helped enormously." (Maxwell) <sup>1</sup>                                                                          |
| Support through sharing knowledge                                          | Online support groups and social media provided opportunities for sharing knowledge and resource links with others coping with long COVID. | "At least I know I'm not alone. And I think people who actually have had the disease tend to know a little bit more about it... I actually think that the support group has given more knowledge than the doctors have." (Ladds <i>et al</i> ) <sup>18</sup> |
| Validation of experiences                                                  | Patients found validation of their experiences in communication with others through online support groups.                                 | "many participants – both men and women – found that online peer support groups offered the greatest source of support through shared experiences, knowledge and validation." (Ladds <i>et al</i> ) <sup>18</sup> [Author quote]                             |
| <b>Theme: seeking acceptance and understanding</b>                         |                                                                                                                                            |                                                                                                                                                                                                                                                              |
| Perception of being doubted by healthcare professionals                    | Healthcare professionals were perceived to doubt patient symptoms were related to COVID-19 and to doubt symptom severity.                  | "There was one GP who just thought it was all anxiety ... she said, "There's nothing wrong with your lungs. This is all anxiety. You must treat your anxiety. There's                                                                                        |



| Themes and sub-themes                                    | Summary of sub-themes                                                                                                             | Supporting example                                                                                                                                                                                                                                                                                                                                                                                                                                                         |
|----------------------------------------------------------|-----------------------------------------------------------------------------------------------------------------------------------|----------------------------------------------------------------------------------------------------------------------------------------------------------------------------------------------------------------------------------------------------------------------------------------------------------------------------------------------------------------------------------------------------------------------------------------------------------------------------|
|                                                          |                                                                                                                                   | nothing wrong with you. How are you going to manage the pandemic if you don't treat your anxiety?" That was really upsetting because I knew I was short of breath..." (Kingstone <i>et al</i> ) <sup>17</sup>                                                                                                                                                                                                                                                              |
| Perception of being doubted by friends and family        | There was a perception that friends and family doubted patients because symptoms were not always obvious.                         | "... one of my friends did say after quite a while, "I'm not being awful, but do you think a lot of it's in his mind?" and I said "no". I was quite upset about that..." (Kingstone <i>et al</i> ) <sup>17</sup>                                                                                                                                                                                                                                                           |
| Perception of being ignored                              | Patients felt that their condition was not given the recognition that it deserved.                                                | "So, COVID-19, it's either a mild infection or you die? No. But no one is prepared to think about us." (Kingstone <i>et al</i> ) <sup>17</sup><br><br>"I felt the medical team was dismissive. There were a lot of 'we don't know.' Which is understandable, but difficult." (Assaf <i>et al</i> ) <sup>19</sup>                                                                                                                                                           |
| Difficulties finding empathetic healthcare professionals | Challenges were described in finding healthcare professionals willing to show empathy and accept patient experiences of symptoms. | "I was initially contacting a certain GP, and that GP literally just went "you need to stay at home and rest, there's nothing we can do", and that frustrated me because it didn't seem like they were being caring, it felt like I was nagging them and being a hypochondriac..." (Kingstone <i>et al</i> ) <sup>17</sup><br><br>"Because I've spoken to four different GPs throughout this. I've not found them very helpful..." (Kingstone <i>et al</i> ) <sup>17</sup> |
| Misdiagnosis or dismissal by healthcare professionals    | Dismissal of symptoms or misdiagnoses were associated with a negative perception of healthcare.                                   | "I was initially contacting a certain GP, and that GP literally just went "you need to stay at home and rest, there's nothing we can do", and that frustrated me because it didn't seem like they were being caring, it                                                                                                                                                                                                                                                    |

| Themes and sub-themes                                                                                                  | Summary of sub-themes                                                                                                                                 | Supporting example                                                                                                                                                                                                                                                                                                                                         |
|------------------------------------------------------------------------------------------------------------------------|-------------------------------------------------------------------------------------------------------------------------------------------------------|------------------------------------------------------------------------------------------------------------------------------------------------------------------------------------------------------------------------------------------------------------------------------------------------------------------------------------------------------------|
|                                                                                                                        |                                                                                                                                                       | felt like I was nagging them and being a hypochondriac and that's how I was being treated..." (Kingstone <i>et al</i> ) <sup>17</sup>                                                                                                                                                                                                                      |
| When available strong empathetic relationships with healthcare professionals provides strong therapeutic relationships | A minority of patients reported strong therapeutic relationships involving listening, empathy, validation, honesty and arranging tests and follow up. | "... actually just the experience of being heard and feeling like somebody got it and was being kind about it, but you know it was okay that they couldn't do anything, I just kind of needed to know that I wasn't losing it really and it was real what I was experiencing, I think so that was really helpful." (Kingstone <i>et al</i> ) <sup>17</sup> |

1  
2  
3  
4  
5  
6  
7  
8  
9  
10  
11  
12  
13  
14  
15  
16  
17  
18  
19  
20  
21  
22  
23  
24  
25  
26  
27  
28  
29  
30  
31  
32  
33  
34  
35  
36  
37  
38  
39  
40  
41  
42  
43  
44  
45  
46

For peer review only

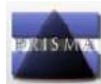

# PRISMA 2009 Checklist

| Section/topic                      | #  | Checklist item                                                                                                                                                                                                                                                                                              | Reported on page # |
|------------------------------------|----|-------------------------------------------------------------------------------------------------------------------------------------------------------------------------------------------------------------------------------------------------------------------------------------------------------------|--------------------|
| <b>TITLE</b>                       |    |                                                                                                                                                                                                                                                                                                             |                    |
| Title                              | 1  | Identify the report as a systematic review, meta-analysis, or both.                                                                                                                                                                                                                                         | Title page         |
| <b>ABSTRACT</b>                    |    |                                                                                                                                                                                                                                                                                                             |                    |
| Structured summary                 | 2  | Provide a structured summary including, as applicable: background; objectives; data sources; study eligibility criteria, participants, and interventions; study appraisal and synthesis methods; results; limitations; conclusions and implications of key findings; systematic review registration number. | 1                  |
| <b>INTRODUCTION</b>                |    |                                                                                                                                                                                                                                                                                                             |                    |
| Rationale                          | 3  | Describe the rationale for the review in the context of what is already known.                                                                                                                                                                                                                              | 2                  |
| Objectives                         | 4  | Provide an explicit statement of questions being addressed with reference to participants, interventions, comparisons, outcomes, and study design (PICOS).                                                                                                                                                  | 2                  |
| <b>METHODS</b>                     |    |                                                                                                                                                                                                                                                                                                             |                    |
| Protocol and registration          | 5  | Indicate if a review protocol exists, if and where it can be accessed (e.g., Web address), and, if available, provide registration information including registration number.                                                                                                                               | 2                  |
| Eligibility criteria               | 6  | Specify study characteristics (e.g., PICOS, length of follow-up) and report characteristics (e.g., years considered, language, publication status) used as criteria for eligibility, giving rationale.                                                                                                      | 3                  |
| Information sources                | 7  | Describe all information sources (e.g., databases with dates of coverage, contact with study authors to identify additional studies) in the search and date last searched.                                                                                                                                  | 3                  |
| Search                             | 8  | Present full electronic search strategy for at least one database, including any limits used, such that it could be repeated.                                                                                                                                                                               | 3                  |
| Study selection                    | 9  | State the process for selecting studies (i.e., screening, eligibility, included in systematic review, and, if applicable, included in the meta-analysis).                                                                                                                                                   | 3                  |
| Data collection process            | 10 | Describe method of data extraction from reports (e.g., piloted forms, independently, in duplicate) and any processes for obtaining and confirming data from investigators.                                                                                                                                  | 4                  |
| Data items                         | 11 | List and define all variables for which data were sought (e.g., PICOS, funding sources) and any assumptions and simplifications made.                                                                                                                                                                       | 4                  |
| Risk of bias in individual studies | 12 | Describe methods used for assessing risk of bias of individual studies (including specification of whether this was done at the study or outcome level), and how this information is to be used in any data synthesis.                                                                                      | 4                  |
| Summary measures                   | 13 | State the principal summary measures (e.g., risk ratio, difference in means).                                                                                                                                                                                                                               | 4                  |

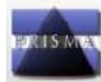

# PRISMA 2009 Checklist

Page 1 of 2

|                      |    |                                                                                                                                                           |   |
|----------------------|----|-----------------------------------------------------------------------------------------------------------------------------------------------------------|---|
| Synthesis of results | 14 | Describe the methods of handling data and combining results of studies, if done, including measures of consistency (e.g., $I^2$ ) for each meta-analysis. | 4 |
|----------------------|----|-----------------------------------------------------------------------------------------------------------------------------------------------------------|---|

| Section/topic               | #  | Checklist item                                                                                                                                   | Reported on page # |
|-----------------------------|----|--------------------------------------------------------------------------------------------------------------------------------------------------|--------------------|
| Risk of bias across studies | 15 | Specify any assessment of risk of bias that may affect the cumulative evidence (e.g., publication bias, selective reporting within studies).     | 5                  |
| Additional analyses         | 16 | Describe methods of additional analyses (e.g., sensitivity or subgroup analyses, meta-regression), if done, indicating which were pre-specified. | n/a                |

## RESULTS

|                               |    |                                                                                                                                                                                                          |          |
|-------------------------------|----|----------------------------------------------------------------------------------------------------------------------------------------------------------------------------------------------------------|----------|
| Study selection               | 17 | Give numbers of studies screened, assessed for eligibility, and included in the review, with reasons for exclusions at each stage, ideally with a flow diagram.                                          | 5 and 15 |
| Study characteristics         | 18 | For each study, present characteristics for which data were extracted (e.g., study size, PICOS, follow-up period) and provide the citations.                                                             | 17       |
| Risk of bias within studies   | 19 | Present data on risk of bias of each study and, if available, any outcome level assessment (see item 12).                                                                                                | 19       |
| Results of individual studies | 20 | For all outcomes considered (benefits or harms), present, for each study: (a) simple summary data for each intervention group (b) effect estimates and confidence intervals, ideally with a forest plot. | 17       |
| Synthesis of results          | 21 | Present results of each meta-analysis done, including confidence intervals and measures of consistency.                                                                                                  | n/a      |
| Risk of bias across studies   | 22 | Present results of any assessment of risk of bias across studies (see Item 15).                                                                                                                          | 5        |
| Additional analysis           | 23 | Give results of additional analyses, if done (e.g., sensitivity or subgroup analyses, meta-regression [see Item 16]).                                                                                    | n/a      |

## DISCUSSION

|                     |    |                                                                                                                                                                                      |    |
|---------------------|----|--------------------------------------------------------------------------------------------------------------------------------------------------------------------------------------|----|
| Summary of evidence | 24 | Summarize the main findings including the strength of evidence for each main outcome; consider their relevance to key groups (e.g., healthcare providers, users, and policy makers). | 10 |
| Limitations         | 25 | Discuss limitations at study and outcome level (e.g., risk of bias), and at review-level (e.g., incomplete retrieval of identified research, reporting bias).                        | 11 |
| Conclusions         | 26 | Provide a general interpretation of the results in the context of other evidence, and implications for future research.                                                              | 12 |

## FUNDING

|         |    |                                                                                                                                            |    |
|---------|----|--------------------------------------------------------------------------------------------------------------------------------------------|----|
| Funding | 27 | Describe sources of funding for the systematic review and other support (e.g., supply of data); role of funders for the systematic review. | 12 |
|---------|----|--------------------------------------------------------------------------------------------------------------------------------------------|----|

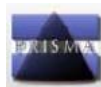

# PRISMA 2009 Checklist

For more information, visit: [www.prisma-statement.org](http://www.prisma-statement.org).

Page 2 of 2

For peer review only

1  
2  
3  
4  
5  
6  
7  
8  
9  
10  
11  
12  
13  
14  
15  
16  
17  
18  
19  
20  
21  
22  
23  
24  
25  
26  
27  
28  
29  
30  
31  
32  
33  
34  
35  
36  
37  
38  
39  
40  
41  
42  
43  
44  
45  
46  
47

# BMJ Open

## Experiences of living with long COVID and of accessing healthcare services: a qualitative systematic review

|                                 |                                                                                                                                                                                                                                                                                                                                                       |
|---------------------------------|-------------------------------------------------------------------------------------------------------------------------------------------------------------------------------------------------------------------------------------------------------------------------------------------------------------------------------------------------------|
| Journal:                        | <i>BMJ Open</i>                                                                                                                                                                                                                                                                                                                                       |
| Manuscript ID                   | bmjopen-2021-050979.R1                                                                                                                                                                                                                                                                                                                                |
| Article Type:                   | Original research                                                                                                                                                                                                                                                                                                                                     |
| Date Submitted by the Author:   | 13-Sep-2021                                                                                                                                                                                                                                                                                                                                           |
| Complete List of Authors:       | Macpherson, Karen; Healthcare Improvement Scotland Glasgow, Cooper, K; Robert Gordon University, School of Health Sciences Harbour, Jenny; Healthcare Improvement Scotland Glasgow Mahal, Dawn; Healthcare Improvement Scotland Glasgow Miller, Charis; Healthcare Improvement Scotland Glasgow Nairn, Moray; Healthcare Improvement Scotland Glasgow |
| <b>Primary Subject Heading</b>: | Qualitative research                                                                                                                                                                                                                                                                                                                                  |
| Secondary Subject Heading:      | Communication, Health services research, Health policy, Patient-centred medicine                                                                                                                                                                                                                                                                      |
| Keywords:                       | Organisation of health services < HEALTH SERVICES ADMINISTRATION & MANAGEMENT, Quality in health care < HEALTH SERVICES ADMINISTRATION & MANAGEMENT, INFECTIOUS DISEASES, QUALITATIVE RESEARCH, VIROLOGY                                                                                                                                              |
|                                 |                                                                                                                                                                                                                                                                                                                                                       |

SCHOLARONE™  
Manuscripts

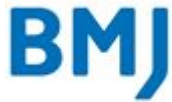

I, the Submitting Author has the right to grant and does grant on behalf of all authors of the Work (as defined in the below author licence), an exclusive licence and/or a non-exclusive licence for contributions from authors who are: i) UK Crown employees; ii) where BMJ has agreed a CC-BY licence shall apply, and/or iii) in accordance with the terms applicable for US Federal Government officers or employees acting as part of their official duties; on a worldwide, perpetual, irrevocable, royalty-free basis to BMJ Publishing Group Ltd ("BMJ") its licensees and where the relevant Journal is co-owned by BMJ to the co-owners of the Journal, to publish the Work in this journal and any other BMJ products and to exploit all rights, as set out in our [licence](#).

The Submitting Author accepts and understands that any supply made under these terms is made by BMJ to the Submitting Author unless you are acting as an employee on behalf of your employer or a postgraduate student of an affiliated institution which is paying any applicable article publishing charge ("APC") for Open Access articles. Where the Submitting Author wishes to make the Work available on an Open Access basis (and intends to pay the relevant APC), the terms of reuse of such Open Access shall be governed by a Creative Commons licence – details of these licences and which [Creative Commons](#) licence will apply to this Work are set out in our licence referred to above.

Other than as permitted in any relevant BMJ Author's Self Archiving Policies, I confirm this Work has not been accepted for publication elsewhere, is not being considered for publication elsewhere and does not duplicate material already published. I confirm all authors consent to publication of this Work and authorise the granting of this licence.



# Experiences of living with long COVID and of accessing healthcare services: a qualitative systematic review

Corresponding author: Karen Macpherson, Delta House, 50 West Nile Street, Glasgow, G1 2NP. UK  
karen.macpherson3@nhs.scot

## Authors:

Professor Kay Cooper, School of Health Sciences, Robert Gordon University, Aberdeen, UK

Jenny Harbour, Healthcare Improvement Scotland, Glasgow UK

Dawn Mahal, Healthcare Improvement Scotland, Glasgow UK

Charis Miller, Healthcare Improvement Scotland, Glasgow UK

Moray Nairn, Healthcare Improvement Scotland, Glasgow UK

Word count: 5,020

## ABSTRACT

**Objective** To explore the experiences of people living with long COVID and how they perceive the healthcare services available to them.

**Design** Qualitative systematic review

**Data sources** Electronic literature searches of websites, bibliographic databases and discussion forums, including PubMed LitCovid, Proquest COVID, EPPI Centre living systematic map of evidence, medRxiv, bioRxiv, Medline, Psychinfo and Web of Science Core Collection were conducted to identify qualitative literature published in English up to 13 January 2021.

**Inclusion criteria** Papers reporting qualitative or mixed-methods studies that focussed on the experiences of long COVID and/or perceptions of accessing healthcare by people with long COVID. Title/abstract and full-text screening were conducted by two reviewers independently, with conflicts resolved by discussion or a third reviewer.

**Quality appraisal** Two reviewers independently appraised included studies using the qualitative CASP checklist. Conflicts were resolved by discussion or a third reviewer.

**Data extraction and synthesis** Thematic synthesis, involving line-by-line reading, generation of concepts, descriptive and analytical themes, was conducted by the review team with regular discussion.

**Results** Five studies published in 2020 met the inclusion criteria, two international surveys and three qualitative studies from the UK. Sample sizes varied from 24 (interview study) to 3,762 (survey). Participants were predominantly young white females recruited from social media or online support groups. Three analytical themes were generated: (i) symptoms and self-directed management of long COVID; (ii) emotional aspects of living with long COVID, and (iii) healthcare experiences associated with long COVID.

### Conclusions

People experience long COVID as a heterogeneous condition, with a variety of physical and emotional consequences. It appears that greater knowledge of long COVID is required by a number of stakeholders, and that the design of emerging long COVID services, or adaptation of existing services for long COVID patients should take account of patients' experiences in their design.

### Strengths and limitations of this study

- This review synthesizes the existing qualitative literature on people's experiences of long COVID and the healthcare services available to them
- The search strategy was comprehensive and sought to find published research, pre-publication articles and grey literature
- The search was limited to the English language, therefore potentially relevant studies may have been excluded

- Only five qualitative studies of variable quality were eligible for inclusion in this review, limiting the extent to which conclusions and practice recommendations can be made
- Participants in the included studies were predominantly younger, female, and users of social media or online support groups, which may also limit the generalisability of the review findings

## INTRODUCTION

The long-term effects of COVID-19 are recognised increasingly as being heterogeneous and complex in nature. At the start of the COVID-19 pandemic there was a widespread perception that COVID-19 was an acute infection that resulted in death or recovery after two weeks.<sup>1</sup> However, many people experienced wide-ranging and fluctuating symptoms for weeks or months after confirmed or suspected COVID-19 infection. As these experiences were shared, on social media and other outlets, the term ‘long COVID’ was generated by patients.<sup>2</sup> There remains no internationally agreed definition of long COVID, as COVID-19 is still a relatively new disease, with ongoing research on the long-term effects.<sup>3</sup> Greenhalgh *et al*<sup>4</sup> suggested “post-acute COVID-19” for symptoms lasting beyond 3 weeks after onset, and “chronic COVID-19” for those lasting beyond 12 weeks. Recent UK guidelines defined “ongoing symptomatic COVID-19” as signs and symptoms lasting 4-12 weeks and “post-COVID-19 syndrome” as signs and symptoms developing during or after COVID-19 and continuing beyond 12 weeks.<sup>5 6</sup> As this systematic review is concerned with lived experience, we will use the patient-generated term long COVID to encapsulate all these definitions.

Symptoms of long COVID can affect those hospitalised and ventilated,<sup>3</sup> as well as those with so-called mild COVID-19, during the acute phase.<sup>4</sup> Little is known about long-term sequelae in asymptomatic patients, with this recently highlighted as an important area for future research.<sup>3</sup> Potential long-term effects include central nervous system, psychosocial, cardiovascular, pulmonary, haematologic, renal and gastrointestinal symptoms, as well as widely reported persistent fatigue, dyspnoea, joint and chest pain.<sup>3</sup> Estimates of long COVID rates vary from 10%<sup>4</sup> to 35%<sup>7</sup> with the true rate yet to be determined. Therefore, with over 108,000,000 confirmed COVID-19 cases globally as of 30<sup>th</sup> January 2021,<sup>8</sup> there are now a large number of people at risk of long COVID.

Healthcare services specifically for long COVID are evolving. For example, some specialist centres have been set up in parts of the UK,<sup>9</sup> and there has been a global call for the development of rehabilitation programmes and services for long COVID patients.<sup>10</sup> In order for healthcare services to meet patients’ needs, it is important to understand the experience of long COVID and of accessing healthcare services from patients’ perspectives. There is a growing body of qualitative research on the lived experience of long COVID, and to date, no published synthesis of this literature. The aim of this qualitative systematic review was therefore to explore the experiences of people living with long COVID and their perceptions of the healthcare services available to them.

## METHODS

A qualitative systematic literature review was undertaken based on an *a priori* protocol (available on request) and reported in accordance with the Preferred Reporting Items for Systematic Reviews and Meta-Analyses (PRISMA) statement.<sup>11</sup> This review updates a review undertaken by the authors to inform the production of the Scottish Intercollegiate Guidelines Network (SIGN), National Institute of Health and Care Excellence (NICE) and Royal College of General Practitioners (RCGP) guideline on the management of long COVID.<sup>5</sup>

### Inclusion criteria

Full details of the inclusion criteria for the review are given in supplementary file 1.

Participants: Individuals experiencing long COVID whether suspected or confirmed by diagnostic test, with no restriction on duration of symptoms. We excluded studies on the views or experiences of healthcare for conditions other than COVID-19 and those relating to the views of healthcare staff, unless they were patients themselves.

Phenomena of interest: people's views on and experiences of living with and managing long COVID, and on the healthcare services available to them.

Context: studies from any country and any setting.

Types of study: systematic reviews of qualitative studies; primary qualitative studies; qualitative components of mixed method studies.

### Information sources and search strategy

An information specialist (CM) carried out a search in October 2020. Sources searched included: PubMed LitCovid, Proquest COVID, EPPI Centre living systematic map of evidence, medRxiv, bioRxiv, Medline, PsychInfo, and Web of Science Core Collection. A full list of resources searched is available in supplementary file 2. Published studies, grey literature and pre-publication articles were sought. In databases not specific to COVID-19, search results were limited to publications in 2020. All searches were limited to the English language due to a lack of translation services and the need for evidence to be synthesised in a timely manner due to the rapidly evolving nature of long COVID research. A search update was conducted on 13 January 2021.

Bibliographic database searches applied adapted versions of the qualitative research filter by DeJean *et al* (2016)<sup>12</sup> and a filter for patient experience literature developed by combining terms from papers by Selva *et al* (2017)<sup>13</sup> and Wessels *et al* (2016)<sup>14</sup>. The search strategy for Medline is available in supplementary file 2. Search strategies for other bibliographic databases are available on request.

## Study selection

Citations were uploaded to EndNote software and duplicates removed. Records were screened against the inclusion criteria based on titles and abstracts by two reviewers independently (JH, DM). The same two reviewers then assessed the full text of potentially relevant articles. Disagreements were discussed and referred to a third reviewer where necessary. The two reviewers were in agreement for the majority of the papers and only one study required recourse to the third reviewer. (KM).

## Data extraction

Two reviewers independently extracted descriptive data from each study (KC, JH, KM, DM, MN), using a data extraction template designed specifically for this review. Details extracted from the studies included: country in which the study was conducted, method of data collection and analysis, phenomena of interest, setting / context / culture, participant characteristics and sample size, and a description of the main results. As this review was conducted in a short timescale, to provide early evidence on a rapidly evolving subject, we did not contact authors for missing information.

## Quality appraisal

Included studies were critically appraised by two reviewers independently (KC, JH, KM, DM, MN, JH) using the CASP qualitative checklist (<https://casp-uk.net/casp-tools-checklists/>). Discrepancies were discussed and referred to a third reviewer if required. For the reasons described above, authors were not contacted for additional information on methodology of their individual studies.

## Data synthesis

Thematic synthesis was undertaken on the findings from included studies.<sup>15</sup> This involved: (i) line-by-line reading of each study by two reviewers independently (JH, KM, MN) to identify initial concepts; (ii) grouping similar concepts into initial descriptive themes and sub-themes, and (iii) generating the final analytical themes. These were discussed and agreed by the review team (KC, JH, KM, DM, MN) throughout the process.

## Patient and public involvement

As a systematic review focussed on published and grey literature no primary research involving patients was conducted. The original synthesis that this review updates, was subject to review by an expert group that included several members with lived experience of long COVID, and a targeted public consultation which included groups representing those with experience of this condition. Further details are provided within the NICE long COVID guideline.<sup>5</sup>

## RESULTS

### Search results

1  
2  
3  
4 The literature search identified 269 articles. A further two studies were identified from  
5 reference lists. After removal of duplicates and title/abstract screening, seven articles were  
6 evaluated as full-text. The main reasons for excluding articles were no qualitative element  
7 to the research, no patient involvement and not meeting our definition of long COVID (we  
8 were interested in studies relating to symptoms over four weeks duration). Out of the seven  
9 fully evaluated articles, one study was excluded because it did not use qualitative methods  
10 or contain data on direct patient experience. A second study which was initially included  
11 was later excluded after it was withdrawn from pre-publication by the authors. A PRISMA  
12 flow diagram depicting the study selection process is provided in figure 1.  
13  
14  
15  
16

### 17 **Characteristics of included studies**

18  
19  
20 Five studies were included in the thematic synthesis (table 1).<sup>1 16-19</sup> Three studies conducted  
21 focus groups or interviews with patients from the UK and two studies, from the Patient Led  
22 Research group, conducted international surveys with most responses coming from the USA  
23 and the UK. Sample sizes varied from 24 interviews to 3,762 survey respondents, and were  
24 generally weighted towards white (83.8%), female participants (75%). The number of  
25 patients included in the studies in which information was gathered through surveys was  
26 much larger than those using interviews and focus groups as data collection methods.  
27 However, while representing fewer patients, the latter method offers the opportunity of  
28 collecting more in depth data and for interaction among participants and/or with the  
29 interviewer. All studies focussed on adults with an age range of 20-68 years in the four  
30 studies that reported participants' ages; one study did not report the number of participants  
31 or their ages.<sup>1</sup>  
32  
33  
34  
35  
36

### 37 **Methodological quality**

38  
39  
40 Studies were of variable methodological quality. Three met most of the criteria on the CASP  
41 checklist (table 2) and thus were considered of high quality, and two met fewer criteria. No  
42 studies were excluded on the basis of quality as all were considered to offer valuable  
43 content despite the limitations identified.  
44  
45

46 All five studies recruited participants through social media and/or online support groups.  
47 While this is understandable given the need to quickly access participants for whom no  
48 established groups or organisations existed, this convenience sampling may have resulted in  
49 bias.<sup>20</sup> People who are active on social media or online support groups are likely to differ  
50 from the general population (for example, younger age) and may be more vocal about their  
51 experiences. Three included studies acknowledged skewed sample characteristics including  
52 mainly white ethnicity, over-representation of women, and a generally younger age group.<sup>16</sup>  
53 <sup>18 19</sup> Limited demographic information was provided on participants, particularly in Maxwell  
54 (2020),<sup>1</sup> making it difficult to determine which population groups may have been missed by  
55 these studies.  
56  
57  
58  
59  
60

1  
2  
3 None of the studies discussed potential biases arising from the relationship between  
4 researchers and study participants. This is despite people with lived experience of long  
5 COVID symptoms being among the study authors, or performing data analysis in some  
6 studies.<sup>16 17 19</sup> This participatory research approach can be considered to represent both a  
7 strength and a weakness. Having authors and researchers with experience of long COVID  
8 analyse data is beneficial in bringing lived experience to the interpretation of data.  
9 However, it may also introduce bias for the same reason.  
10  
11  
12

13 Several other quality issues were noted. In the study by Kingstone *et al*<sup>17</sup>, participants  
14 received a compensation voucher for their time, which may have influenced decisions on  
15 whether to participate. Ladds *et al*<sup>18</sup> only fully transcribed the first 10 out of the 55  
16 interviews (the remaining interviews were partially transcribed). This was due to the  
17 urgency of the work and limited resources plus a perceived lack of need to duplicate  
18 previously discovered themes. This may have introduced bias. Finally, Maxwell<sup>1</sup> reported  
19 very limited methodological details, making it difficult to determine how the research was  
20 conducted or the number of people involved in the focus group.  
21  
22  
23

### 24 **Review findings**

25 The initial stages of thematic analysis resulted in the generation of 138 descriptive themes.  
26 These were then refined into 54 sub-themes, which were attributed to 11 higher order  
27 themes using an iterative process, with continuous discussion between reviewers. Further  
28 review and refinement of themes resulted in three overarching analytical themes: (i)  
29 symptoms and self-directed management of long COVID; (ii) emotional aspects of living with  
30 long COVID; and (iii) healthcare experiences associated with long COVID. Figure 2 shows the  
31 relationship between the final three themes and the initial 11 higher order themes. Full  
32 details of descriptive themes and sub-themes are available in supplementary file 3.  
33  
34  
35

### 36 **Symptoms and self-directed management of long COVID**

37  
38 Evidence from all the included studies<sup>1 16-19</sup> showed that people with long COVID experience  
39 a wider range of symptoms than the three symptoms officially recognised as acute COVID-  
40 19: high temperature, new continuous cough, and change or loss of sense of smell or taste.  
41 One individual stated:  
42  
43  
44

45  
46 *"From week four I started to get chest pains and then breathlessness, gradually other*  
47 *symptoms developed including dry mouth, sore tongue, joint pains, fatigue, rash and*  
48 *tachycardia."*<sup>1</sup>  
49

50  
51 The symptoms experienced by patients with long COVID varied in severity from relatively  
52 mild to potentially life-threatening symptoms that required hospital admission. Symptoms  
53 also fluctuated over time with new symptoms appearing at different stages of the illness  
54 and in different parts of the body. Each symptom was experienced for a prolonged but  
55 variable length of time, with a cumulative effect in many cases.  
56  
57

58 People identified a disconnect between their lived experiences, official advice, and public  
59 perception of the illness. It was felt that the public perceived the illness as a binary  
60

1  
2  
3 condition – either mild and easily treated at home or serious and requiring hospitalisation –  
4 with no variation or allowances made for ongoing symptoms.  
5

6  
7 *“So, COVID-19, it’s either a mild infection or you die? No. But no one is prepared to think*  
8 *about us.”<sup>17</sup>*  
9

10 The literature showed that people believed they would require a short recovery period and  
11 would be back at work in two weeks, a belief mirrored by employers and the public. The  
12 lived experience, for some, was quite different:  
13

14  
15 *“After nearly 6 months I have started to feel some improvement, although doing anything*  
16 *remotely physical results in a flare up of symptoms...”<sup>1</sup>*  
17

18  
19 *“I had to take two weeks off, had to work from home for four, but had to return for two*  
20 *weeks with fever as my employer would not give me more time [...]”<sup>16</sup>*  
21

22  
23 This discordance between expectations and experience seemed to have a direct effect on  
24 the mental and emotional state of those experiencing prolonged illness, often leading to  
25 uncertainty about what to do about their symptoms. People described needing to adjust  
26 their lifestyle, including pacing themselves and setting realistic goals, in order to self-  
27 manage their symptoms. A number of patients described attempts at self-care such as  
28 taking supplements or trying therapeutic massage.  
29

30  
31 Many people turned to social media and support groups (online or face-to-face) for support  
32 and found them to be a valuable way to share experiences, knowledge and resources with  
33 others in a similar situation. This communication helped to validate patient experiences and  
34 provided reassurance they were not alone in their struggle with long-term symptoms.  
35

36  
37 *“At least I know I’m not alone. And I think people who actually have had the disease tend to*  
38 *know a little bit more about it... I actually think that the support group has given more*  
39 *knowledge than the doctors have.”<sup>18</sup>*  
40

41  
42 However, there were also reports of anxiety and depression triggered by knowledge  
43 garnered from these online groups.  
44

45  
46 *“...Internet support groups, yeah on the Facebook groups that I’m on, I mean to be honest, I*  
47 *try not to read that group too much because it depresses me, makes me a bit anxious.”<sup>17</sup>*  
48

### 49 **Emotional aspects of living with long COVID**

50  
51 For many patients there was a feeling that their self-identity was affected by long COVID.  
52 People reported an impact on how they viewed themselves, before and after their illness.  
53 There was a feeling they had to reconsider who they were and what they could do within  
54 the context of family and work. The phrase “compared with how I used to be” was used by  
55 multiple participants<sup>17</sup>. Ladds *et al* (2020)<sup>18</sup> commented on the concept of a “spoiled  
56 identity” where an identity as previously “healthy, independent and successful” was  
57 perceived to be threatened.  
58  
59  
60



1  
2  
3  
4 Interviews with doctors and other clinicians who had experienced long COVID showed that  
5 many were worried about the impact of cognitive deficits on their ability to perform their  
6 jobs.  
7

8  
9 *"[T]he medicolegal aspect is huge .... and it's scary to not be able to recognise potentially*  
10 *where you have deficits because if you can't recognise them then that's an unknown*  
11 *unknown in what can you do with that."*<sup>18</sup>  
12

13  
14 There was a sense of stigma associated with long COVID, with people experiencing a sense  
15 of shame and blame (internally generated stigma) and expressing fears that employers and  
16 others in the community may stigmatise them for having long COVID (externally generated  
17 stigma). Family members were considered to be affected by long COVID and were seen as  
18 also requiring support. One interview participant described the impact her symptoms had  
19 on her family and how she felt they did not believe her:  
20  
21

22  
23 *"I think, at first, they just thought, 'Oh, for god's sake, she's napping again'. I feel like I*  
24 *constantly have to explain. I'm just exhausted and I just want to know why I'm so exhausted*  
25 *...."*<sup>17</sup>  
26

27  
28 Patients described experiencing a range of emotions as part of their illness journey. Anxiety  
29 was often related to multiple aspects of the illness including uncertainty about the cause of  
30 symptoms, concern that they may never recover completely, and anxiety due to not being  
31 believed by healthcare professionals, family and friends.  
32

33  
34 *".... I was really frightened, terrified and just thought I might die on a couple of occasions ...*  
35 *maybe not "I'm going to die right now", but definitely "I'm never going to get better from*  
36 *this" kind of feeling."*<sup>17</sup>  
37

38  
39 Patients also expressed a strong desire to find acceptance and understanding about their  
40 experiences of long COVID, both among healthcare professionals and family and friends.  
41

42  
43 *"... one of my friends did say after quite a while, "I'm not being awful, but do you think a lot*  
44 *of it's in his mind?" and I said "no". I was quite upset about that..."*<sup>17</sup>  
45

46  
47 Similarly, there was a widespread perception that healthcare professionals doubted  
48 patients' descriptions of long COVID<sup>1</sup>, ignored patient concerns<sup>17</sup>, misdiagnosed  
49 symptoms<sup>19</sup>, or were dismissive of patient experiences<sup>19</sup>. This lack of knowledge affected  
50 people's feelings around their healthcare experiences<sup>17</sup>.  
51

## 52 **Healthcare experiences**

53

54  
55 Across all of the studies, participants expressed concerns relating to the lack of knowledge,  
56 information and understanding about long COVID among healthcare professionals. While  
57 the reason behind this lack of knowledge was understood, there was a general feeling that  
58 there needed to be acknowledgement of this gap within the healthcare community.  
59  
60

1  
2  
3 *“Well yeah, I feel like there’s a lack of knowledge. And I really wasn’t able to get any*  
4 *answers, I know, you know this is obviously a novel illness. But just even for one doctor to*  
5 *look into it a bit and come back to me, didn’t happen.”<sup>17</sup>*  
6  
7

8 The absence of knowledge and information about long COVID symptoms was reported to  
9 create anxiety and confusion for patients. Ladds *et al* (2020)<sup>18</sup> found that this confusion was  
10 intensified by the lack of medical knowledge, understanding and guidance from healthcare  
11 professionals. There were also reports of conflicting or inconsistent advice from health  
12 professionals.<sup>18</sup>  
13  
14

15 Some professionals did recognise the limitations of their own knowledge<sup>18</sup> and referred  
16 patients to online support groups. Focus group participants suggested they would rather be  
17 told that the professional did not have the knowledge required to address their illness, if  
18 that was the case. The importance of finding a General Practitioner (GP) who was  
19 understanding, empathetic and who provided support to those experiencing long COVID is  
20 highlighted in this quote:  
21  
22

23  
24 *“I have to say it was a really powerful experience speaking to the GPs ... the two more recent*  
25 *ones, actually just the experience of being heard and feeling like somebody got it and was*  
26 *being kind about it, but you know it was okay that they couldn’t do anything, I just kind of*  
27 *needed to know that I wasn’t losing it really and it was real what I was experiencing, I think*  
28 *so that was really helpful.”<sup>17</sup>*  
29  
30

31 Along with this perceived lack of knowledge, multiple perceived barriers to healthcare  
32 access were reported, along with a general perception among participants that health  
33 services and doctors were too busy dealing with cases of acute COVID-19 to have capacity to  
34 deal with anything else, including patients with long-term symptoms. This perception  
35 appeared strengthened by the difficulties people experienced when trying to access primary  
36 care, especially if they were seeking a face-to-face consultation.  
37  
38

39  
40 *“I think the message to avoid hospital and the GP unless you had specific symptoms was very*  
41 *unhelpful, particularly as I didn’t have, and never have had, a cough or fever”<sup>1</sup>*  
42  
43

44 In general, study participants found accessing care to be “complex, difficult and  
45 exhausting”.<sup>18</sup> This led to patients describing how they felt they had to manipulate the  
46 inflexible algorithm-driven systems in order to receive care, which led to feelings of guilt and  
47 anger. Some patients described creative solutions they had come up with to help them  
48 access healthcare, while others reported resorting to private healthcare to access tests.  
49 Many patients felt they needed to conduct their own research and construct their own care  
50 pathways, taking the lead in arranging consultations with specialists and circumventing  
51 bottlenecks in the system. This was reported as a route often employed by medical  
52 professionals who themselves were suffering from long COVID.  
53  
54

55 There was also a perceived lack of support within the system. Some individuals described  
56 how NHS111 (a national telehealth helpline in the UK) had directed them to their GP who  
57 then directed them back to NHS111.<sup>18</sup> There was what appeared to be a lack of guidance for  
58  
59  
60

1  
2  
3 those who did not need to be admitted to hospital but were no longer in the acute phase of  
4 the illness.  
5

6  
7 Patients who felt they had received satisfactory care and access to healthcare were  
8 generally those who had been offered follow-up appointments and who felt their healthcare  
9 providers gave them ongoing support, even if that was in the form of a video or telephone  
10 call.  
11

12  
13 Telemedicine was widely used to facilitate interactions with healthcare services. However, it  
14 was generally perceived by patients to have limitations. Remote consulting with primary  
15 care was viewed by some patients as potentially limiting direct access to GPs, disrupting  
16 continuity of care (people often could not see the same GP every time), and making the  
17 communication of symptoms more challenging. Some patients felt that strict adherence to  
18 protocols for telemedicine-delivered care affected patient safety or led to mismanagement  
19 of their care.  
20  
21

22  
23 *"... I remembered ringing my GP from the floor on my lounge laying on my front and kind of*  
24 *saying I'm really short of breath, you know, do you think I should try an inhaler do I need to*  
25 *go back to A&E and I was kind of told well you don't really sound too out of breath over the*  
26 *phone .... I really felt at that point right if you could see me you would see that I am really*  
27 *like broken"*<sup>18</sup>  
28

29  
30 A positive view expressed in relation to telemedicine was that it increased accessibility of  
31 primary care during periods of societal restrictions aimed at controlling the spread of  
32 COVID-19.  
33

34  
35 *"My doctor was available via messaging, telephone, and telemedicine. She also contracted*  
36 *COVID-19 so she shared her experience with recovery and it helped me stay calm that I was*  
37 *on the right track."*<sup>19</sup>  
38

39  
40 When asked to describe desirable features of healthcare services or service delivery for  
41 patients with long COVID<sub>2</sub>, research participants asked for face-to-face assessments and  
42 talked about the need for 'one-stop clinics' with multidisciplinary teams (MDT) who could  
43 look at their wide-ranging symptoms and treat them holistically. A case manager to oversee  
44 individual patients and ensure that all aspects of their care was considered was suggested,  
45 along with meaningful referral pathways and criteria.  
46  
47

48  
49 *"What would be most helpful is if all main hospitals could have a COVID clinic that had*  
50 *experts from respiratory, cardiology, rheumatology, neurology, physiotherapy etc, so you*  
51 *could go along for half a day and see people from these different departments, they can*  
52 *refer you for tests and you can get a plan in place, we are having such a range of symptoms*  
53 *that GPs are struggling to know what to do with you"*<sup>1</sup>  
54

55  
56 Other participants spoke about wanting to be listened to, to be believed and understood,  
57 and to be offered practical advice on coping.  
58

## 59 DISCUSSION

60

1  
2  
3  
4  
5 To our knowledge, this is the first synthesis of findings from qualitative studies on peoples'  
6 experiences of living with long COVID and accessing healthcare services for this condition.  
7 Our main findings were threefold. Firstly, that the lived experience of long COVID is highly  
8 variable and perceived as being at odds with public perceptions and official guidance on  
9 COVID-19. Secondly, that there are significant emotional consequences of living with long  
10 COVID that need to be understood by a number of stakeholders. Finally, that people with  
11 long COVID report a range of positive and negative healthcare experiences that can be used  
12 to inform the development of new, or adaptation of existing, services for this important  
13 patient group.  
14  
15

16  
17 COVID-19 is a new illness, first declared a public health emergency by the World Health  
18 Organisation on 30<sup>th</sup> January 2020.<sup>21</sup> The implications across the globe and stress on  
19 healthcare services are unprecedented. It is perhaps unsurprising that knowledge of long  
20 COVID is perceived as underdeveloped; there is no agreed definition of long COVID and the  
21 long-term sequelae are to a large extent unknown.<sup>3</sup> Many people in the included studies  
22 turned to social media and patient-led support groups, due to perceived lack of  
23 understanding from family, employers and healthcare professionals.<sup>1 17-19</sup> Social media and  
24 support groups are widely used for other health conditions,<sup>22</sup> but are generally considered  
25 complementary to healthcare services; part of the “jigsaw” that makes supported self-  
26 management successful.<sup>23</sup> Therefore, there appears to be a need for more widespread  
27 understanding of and information about long COVID, and people with lived experience are  
28 ideally placed to contribute their expert opinion.  
29  
30  
31

32  
33 Our review highlighted a number of emotional consequences of long COVID including the  
34 impact on people’s identities, employment, and relationships with family and healthcare  
35 providers. Emerging models and recommendations for managing long COVID all highlight  
36 the need for psychological inputs.<sup>24-26</sup> It is perhaps more complex to address the wider  
37 emotional consequences highlighted by this review; however, understanding and  
38 information as described above and targeted at various levels (e.g. healthcare professionals,  
39 patients, public, employers) appears to be indicated.  
40  
41

42  
43 In addition to lack of knowledge, the review found a number of barriers to accessing  
44 healthcare, with reports of unhelpful messaging and complex processes to navigate.  
45 Healthcare professionals with long COVID were more able to navigate this complex system  
46 than non-professionals, suggesting a potential inequality. Telemedicine, rapidly rolled-out in  
47 many countries as a way of maintaining healthcare during the pandemic,<sup>27</sup> was not always  
48 seen as beneficial. As new models for managing long COVID emerge, these findings may be  
49 useful for ensuring that services are patient-centred.<sup>28</sup> The finding that patients want  
50 multidisciplinary, holistic services is congruent with the well-documented multi-organ  
51 nature of COVID-19, and heterogeneous nature of long COVID symptoms.<sup>3</sup>  
52  
53

### 54 **Strengths and limitations**

55  
56  
57 Our review has highlighted a range of important issues associated with long COVID and  
58 accessing healthcare, from the perspective of people with this condition. The review is  
59 limited by the small number of qualitative studies (n=5) that have been published to date,  
60

1  
2  
3 and will benefit from being updated as further research becomes available in this fast-  
4 moving field. Nonetheless, it contributes to an early understanding of the lived experience  
5 of long COVID and of accessing healthcare services. The majority of studies were conducted  
6 in the UK, there was over-representation of younger and female, white, participants, and all  
7 studies recruited participants via social media or online support groups. Therefore, the  
8 findings apply to this population, and it is possible that other groups of people with long  
9 COVID have different experiences and views. Some emerging evidence suggests that long  
10 COVID may be more prevalent in younger female individuals<sup>29</sup>; a meta-analysis in pre-print  
11 form however reports a linear increase in long COVID from age 20-70<sup>30</sup>. We limited our  
12 search to studies published in English; therefore it is possible that we missed studies  
13 published in other languages. We did not exclude studies on methodological quality,  
14 resulting in the inclusion of one study with limited methodological details resulting in a low  
15 CASP score. However, the validity of appraisal of qualitative research is debated in the  
16 literature,<sup>31</sup> and we are confident that all studies contributed valuable data on the lived  
17 experience of long COVID. We did not contact authors for additional information that may  
18 have allowed us to more fully appraise methodological quality of the included studies.  
19 However, because we did not exclude any studies based on methodological quality;  
20 therefore, the review findings were not affected.  
21  
22  
23  
24  
25

### 26 **Implications for practice**

27  
28  
29 There is a need for greater understanding and communication about long COVID at a  
30 number of levels (public, policy and healthcare professional). Our findings suggest that  
31 people with long COVID are well placed to co-create this understanding and communication.  
32 Our findings can also be used by those currently developing services for people with long  
33 COVID, to ensure that they meet patients' needs. The varied and fluctuating symptoms and  
34 emotional consequences experienced by people with long COVID indicate a need for multi-  
35 disciplinary services, which provide holistic patient-centred assessment, appropriate  
36 management and specialist referral where indicated.  
37  
38  
39

### 40 **Implications for research**

41  
42 Further qualitative research on more culturally diverse samples of people with long COVID is  
43 indicated to help understand the impact of long COVID and the healthcare needs of the  
44 wider population than is represented by the current review. As models of care and services  
45 are developed/adapted for people with long COVID, it is vital that the views and experiences  
46 of people with long COVID continue to be explored.  
47  
48  
49

## 50 **CONCLUSION**

51  
52 We have presented a synthesis of the current qualitative evidence on the experience of  
53 living with long COVID and of accessing healthcare services. People experience long COVID  
54 as a heterogeneous condition, with a variety of physical and emotional consequences. It  
55 appears that greater knowledge of long COVID is required by a number of stakeholders, and  
56 that the design of emerging long COVID services, or adaptation of existing services for long  
57 COVID patients should take account of patients' experiences in their design.  
58  
59  
60

## Funding statement

This research received no specific grant from any funding agency in the public, commercial or not-for-profit sectors.

## Contributors

DM, JH, KC, KM and MN developed the protocol. CM conducted the literature searches. JH and DM screened articles for inclusion. KM, DM, JH and MN extracted data, appraised studies, and, including KC, were involved with synthesising the qualitative data, interpreting the findings and writing the first draft of the manuscript. Other members of the research teams within Robert Gordon University, Aberdeen, and Healthcare Improvement Scotland provided peer review comments on the draft manuscript.

## Competing interests

None declared.

## Data sharing statement

Search strategies for databases other than Medline are available by contacting the corresponding author. Full data extraction tables are also available.

## Ethics approval statement

Ethics approval was not sought as this study was a systematic review of published evidence.

## REFERENCES

1. Maxwell D. Living with COVID19: a dynamic review of the evidence around ongoing Covid19 symptoms (often called Long Covid) 2020 [2020 Nov 02]. Available from: <https://evidence.nihr.ac.uk/themedreview/living-with-covid19/>.
2. Callard F, Perego E. How and why patients made Long Covid. *Soc Sci Med* 2021;268:113426.
3. Higgins V, Sohaei D, Diamandis EP, et al. COVID-19: from an acute to chronic illness? Potential long-term health consequences. *Crit Rev Clin Lab Sci* 2020 [published Online First: 21 Dec 2020]
4. Greenhalgh T, Knight M, A'Court C, et al. Management of post-acute covid-19 in primary care. *BMJ* 2020;370:m3026.
5. National Institute for Health and Care Excellence (NICE). COVID-19 rapid guideline: managing the long-term effects of COVID-19 2020 [2 Feb 2021]. Available from: <https://www.nice.org.uk/guidance/ng188>.
6. Scottish Intercollegiate Guidelines Network (SIGN). Managing the long-term effects of COVID-19 2020 [2 Feb 2021]. Available from: <https://www.sign.ac.uk/our-guidelines/managing-the-long-term-effects-of-covid-19/>.
7. Centers for Disease Control and Prevention (USA). Morbidity and mortality weekly report: symptom duration and risk factors for delayed return to usual health among outpatients with COVID-19 in a multistate health care systems network — United States, March–June

- 2020 2020 [2 Feb 2021]. Available from:  
<https://www.cdc.gov/mmwr/volumes/69/wr/mm6930e1.htm>.
8. World Health Organization (WHO). Coronavirus disease (COVID-19) pandemic 2021 [2 Feb 2021]. Available from: <https://www.who.int/emergencies/diseases/novel-coronavirus-2019>.
  9. NHS England. NHS to offer 'long covid' sufferers help at specialist centres 2020 [2 Feb 2020]. Available from: <https://www.england.nhs.uk/2020/10/nhs-to-offer-long-covid-help/>.
  10. Gutenbrunner C, Stokes EK, Dreinhofer K, et al. Why rehabilitation must have priority during and after the COVID-19-pandemic: a position statement of the Global Rehabilitation Alliance. *J Rehabil Med* 2020;52(7):jrm00081.
  11. Moher D, Liberati A, Tetzlaff J, et al. Preferred reporting items for systematic reviews and meta-analyses: the PRISMA statement. *BMJ* 2009;339:b2535. doi: 10.1136/bmj.b2535 [published Online First: 2009/07/23]
  12. DeJean D, Giacomini M, Simeonov D, et al. Finding Qualitative Research Evidence for Health Technology Assessment. *Qual Health Res* 2016;26(10):1307-17. doi: 10.1177/1049732316644429 [published Online First: 2016/04/28]
  13. Selva A, Sola I, Zhang Y, et al. Development and use of a content search strategy for retrieving studies on patients' views and preferences. *Health Qual Life Outcomes* 2017;15(1):126. doi: 10.1186/s12955-017-0698-5 [published Online First: 2017/08/31]
  14. Wessels M, Hielkema L, van der Weijden T. How to identify existing literature on patients' knowledge, views, and values: the development of a validated search filter. *J Med Libr Assoc* 2016;104(4):320-24. doi: 10.3163/1536-5050.104.4.014 [published Online First: 2016/11/09]
  15. Thomas J, Harden A. Methods for the thematic synthesis of qualitative research in systematic reviews. *BMC Med Res Methodol* 2008;8:45. doi: 10.1186/1471-2288-8-45 [published Online First: 2008/07/12]
  16. Davis HE, Assaf GS, McCorkell L, et al. Characterizing long COVID in an international cohort: 7 months of symptoms and their impact. 2021
  17. Kingstone T, Taylor AK, O'Donnell CA, et al. Finding the 'right' GP: a qualitative study of the experiences of people with long-COVID. *BJGP open* 2020;13:13. doi: <https://dx.doi.org/10.3399/bjgpopen20X101147>
  18. Ladds E, Rushforth A, Wieringa S, et al. Persistent symptoms after Covid-19: qualitative study of 114 "long Covid" patients and draft quality principles for services. *BMC health services research* 2020;20(1):1144. doi: <https://dx.doi.org/10.1186/s12913-020-06001-y>
  19. Patient Led Research. Report: What Does COVID-19 Recovery Actually Look Like? An Analysis of the Prolonged COVID-19 Symptoms Survey by Patient-Led Research Team 2020 [2020 Oct 27]. Available from: <https://patientresearchcovid19.com/research-report-1/>.
  20. Blank G, Lutz C. Representativeness of Social Media in Great Britain: Investigating Facebook, LinkedIn, Twitter, Pinterest, Google+, and Instagram. *American Behavioural Scientist* 2017;61(7) doi: <https://doi.org/10.1177/0002764217717559>
  21. World Health Organization (WHO). COVID-19 public health emergency of international concern: global research and innovation forum - towards a research roadmap 2020 [16 Feb 2021]. Available from: [https://www.who.int/publications/m/item/covid-19-public-health-emergency-of-international-concern-\(pheic\)-global-research-and-innovation-forum](https://www.who.int/publications/m/item/covid-19-public-health-emergency-of-international-concern-(pheic)-global-research-and-innovation-forum).
  22. Myneni S LB, Singh T, Paiva K, Kim SM, Cebula AV, Villanueva G, Wang J. Diabetes self-management in the age of social media: large-scale analysis of peer interactions using semiautomated methods. *JMIR Med Inform* 2020;8(6):e18441.
  23. Anderson N OG. "It all needs to be a full jigsaw, not just bits": exploration of healthcare professionals' beliefs towards supported self-management for long-term conditions. *BMC Psychol* 2019;7(1):38.
  24. Ladds E RA, Wieringa S, Taylor S, Rayner C, Husain L, Greenhalgh T,. Developing services for long COVID: lessons from a study of wounded healers. *Clin Med J* 2021 [published Online First: Jan 2021]

- 1  
2  
3 25. Barker-Davies RM OSO, Senaratne KPP, Baker P, Cranley M, Dharm-Datta S, Ellis H, Goodall D,  
4 Gough M, Lewis S, Norman J, Papadopoulou T, Roscoe D, Sherwood D, Turner P, Walker T,  
5 Mistlin A, Phillip R, Nicol AM, Bennett AN, Bahadur S,. The Stanford Hall consensus  
6 statement for post-COVID-19 rehabilitation. *Br J Sports Med* 2020;54(16):949-59.  
7  
8 26. Sivan M HS, Hollingworth L, Snook N, Hickman K, Clifton IJ,. Development of an integrated  
9 rehabilitation pathway for individuals recovering from COVID-19 in the community. *J Rehabil*  
10 *Med* 2020;52(8):jrm00089.  
11  
12 27. Thomas EE HH, Mehrotra A, Snoswell L, Banbury A, Smith AC,. Building on the momentum:  
13 sustaining telehealth beyond COVID-19. *J Telemed Telecare* 2020 [published Online First: 26  
14 Sept 2020]  
15  
16 28. Moore L BN, Lydahl D, Naldemirci O, Elam M, Wolf A,. Barriers and facilitators to the  
17 implementation of person-centred care in different healthcare contexts. *Scand J Caring Sci*  
18 2017;31(4):662-73.  
19  
20 29. NIHR. Living with Covid19 – Second review 2021 [2021 Jul 08 ]. Available from:  
21 <https://evidence.nihr.ac.uk/themedreview/living-with-covid19-second-review/>.  
22  
23 30. Thompson EJ, Williams DM, Walker AJ, et al. Risk factors for long COVID: analyses of 10  
24 longitudinal studies and electronic health records in the UK [Preprint]. *medRxiv* 2021 doi:  
25 <https://doi.org/10.1101/2021.06.24.21259277>  
26  
27 31. Majid U VM. Appraising qualitative research for evidence syntheses: a compendium of quality  
28 appraisal tools. *Qual Health Res* 2018;28(13):2115-31.  
29  
30  
31  
32  
33  
34  
35  
36  
37  
38  
39  
40  
41  
42  
43  
44  
45  
46  
47  
48  
49  
50  
51  
52  
53  
54  
55  
56  
57  
58  
59  
60



## FIGURES AND TABLES

### Figure legends

Figure 1 PRISMA flow diagram of study selection

Figure 2 Map of analytical and descriptive themes from the analysis

For peer review only

1  
2  
3  
4  
5  
6  
7  
8  
9  
10  
11  
12  
13  
14  
15  
16  
17  
18  
19  
20  
21  
22  
23  
24  
25  
26  
27  
28  
29  
30  
31  
32  
33  
34  
35  
36  
37  
38  
39  
40  
41  
42  
43  
44  
45  
46

For peer review only

**Table 1 Characteristics of included studies**

| Study [country]                                             | Study methods and setting                                                                                                                              | Participant characteristics and sample size                                                                                          | Main results                                                                                                                                                                                                                                                                                                                        |
|-------------------------------------------------------------|--------------------------------------------------------------------------------------------------------------------------------------------------------|--------------------------------------------------------------------------------------------------------------------------------------|-------------------------------------------------------------------------------------------------------------------------------------------------------------------------------------------------------------------------------------------------------------------------------------------------------------------------------------|
| Assaf <i>et al.</i> (2020) <sup>19</sup><br>[Multinational] | Online survey 21 Apr - 2 May 2020 circulated to long COVID support groups and through social media<br><br>Quantitative and qualitative data collection | n=640<br><br>Patients with symptoms lasting >2 weeks<br><br>62.7% aged 30-49; 76.0% white; 76.6% female                              | Cyclical symptoms experienced unexpectedly for ≥6 weeks<br><br>Stigma experienced by patients with long COVID<br><br>Impacts on lifestyle, including physical activity<br><br>Dismissed or misdiagnosed by medical professionals<br><br>Sentiment analysis conducted on satisfaction with medical staff and on sharing experiences. |
| Davis <i>et al.</i> (2020) <sup>16</sup><br>[Multinational] | Online survey 6 Sept – 25 Nov 2020 circulated to online patients support groups and social media<br><br>Quantitative and qualitative data collection   | n=3,762<br><br>Patients with symptoms lasting >28 days<br><br>60.8% aged 40-59; 85.3% white; 78.9% female                            | Patients with long COVID reported prolonged multisystem involvement and significant disability.<br><br>The most frequent symptoms reported after 6 months were:<br><br>fatigue<br><br>post-exertional malaise<br><br>cognitive dysfunction.                                                                                         |
| Kingstone <i>et al.</i> (2020) <sup>17</sup><br>[UK]        | Recruitment through social media (Twitter or Facebook) and snowball sampling Jul - Aug 2020<br><br>Semi-structured interviews by telephone or video    | n=24<br><br>Self-reported persistent symptoms following acute COVID-19 illness<br>Age range 20-68; 87.5% white British; 79.2% female | Four key themes reported in results:<br><br>'hard and heavy work' of enduring and managing symptoms, trying to find answers, and accessing care<br><br>living with uncertainty and fear                                                                                                                                             |

|                                                     |                                                                                                                                                                                                                                                                           |                                                                                                                                                                  |                                                                                                                                                                                                                                                           |
|-----------------------------------------------------|---------------------------------------------------------------------------------------------------------------------------------------------------------------------------------------------------------------------------------------------------------------------------|------------------------------------------------------------------------------------------------------------------------------------------------------------------|-----------------------------------------------------------------------------------------------------------------------------------------------------------------------------------------------------------------------------------------------------------|
|                                                     | <p>call (duration 35-90 minutes)</p> <p>Thematic analysis using principles of constant comparison</p>                                                                                                                                                                     |                                                                                                                                                                  | <p>importance of finding the 'right' GP</p> <p>recovery and rehabilitation: what would help?</p>                                                                                                                                                          |
| <p>Ladds <i>et al.</i> (2020)<sup>18</sup> [UK]</p> | <p>Participants recruited from UK-based long COVID patient support groups, social media and snowball sampling</p> <p>Individual narrative interview (telephone or video) or participation in an online focus group</p> <p>Constant comparison method of data analysis</p> | <p>Total n = 114</p> <p>55 interviews (73% female); median age 48 (range 31-68)</p> <p>59 focus group participants (68% female); median age 43 (range 27-73)</p> | <p>Five key themes reported in results:</p> <p>the illness experience,</p> <p>accessing care,</p> <p>relationships (or lack of) with clinicians,</p> <p>emotional touchpoints in encounters with health services,</p> <p>ideas for improving services</p> |
| <p>Maxwell (2020)<sup>1</sup> [UK]</p>              | <p>Focus group of COVID-19 Facebook group members</p>                                                                                                                                                                                                                     | <p>Not reported</p>                                                                                                                                              | <p>Four key themes reported in results:</p> <p>expectations,</p> <p>symptom journey,</p> <p>being doubted,</p> <p>support</p>                                                                                                                             |

Table 2 CASP critical appraisal of using the checklist for qualitative studies

|                                                       | <b>Assaf et al.<sup>19</sup></b> | <b>Kingston et al.<sup>17</sup></b> | <b>Ladds et al.<sup>18</sup></b> | <b>Maxwell<sup>1</sup></b> | <b>Davis et al.<sup>16</sup></b> |
|-------------------------------------------------------|----------------------------------|-------------------------------------|----------------------------------|----------------------------|----------------------------------|
| <b>Clear aims statement</b>                           | Y                                | Y                                   | Y                                | N                          | Y                                |
| <b>Appropriate methodology</b>                        | U                                | Y                                   | Y                                | Y                          | Y                                |
| <b>Appropriate research design</b>                    | U                                | Y                                   | Y                                | U                          | Y                                |
| <b>Appropriate recruitment</b>                        | Y                                | Y                                   | Y                                | U                          | Y                                |
| <b>Appropriate data collection</b>                    | U                                | Y                                   | Y                                | U                          | Y                                |
| <b>Researcher-participant relationship considered</b> | N                                | U                                   | U                                | U                          | U                                |
| <b>Ethical issues considered</b>                      | U                                | Y                                   | Y                                | U                          | Y                                |
| <b>Rigorous data analysis</b>                         | U                                | Y                                   | Y                                | N                          | U                                |
| <b>Clear statement of findings</b>                    | U                                | Y                                   | Y                                | Y                          | Y                                |

Y=criterion satisfied; N=criterion not satisfied; U=unclear if criterion satisfied

1  
2  
3  
4  
5  
6  
7  
8  
9  
10  
11  
12  
13  
14  
15  
16  
17  
18  
19  
20  
21  
22  
23  
24  
25  
26  
27  
28  
29  
30  
31  
32  
33  
34  
35  
36  
37  
38  
39  
40  
41  
42  
43  
44  
45  
46  
47  
48  
49  
50  
51  
52  
53  
54  
55  
56  
57  
58  
59  
60

For peer review only

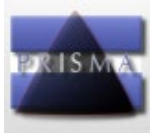

## PRISMA 2009 Flow Diagram

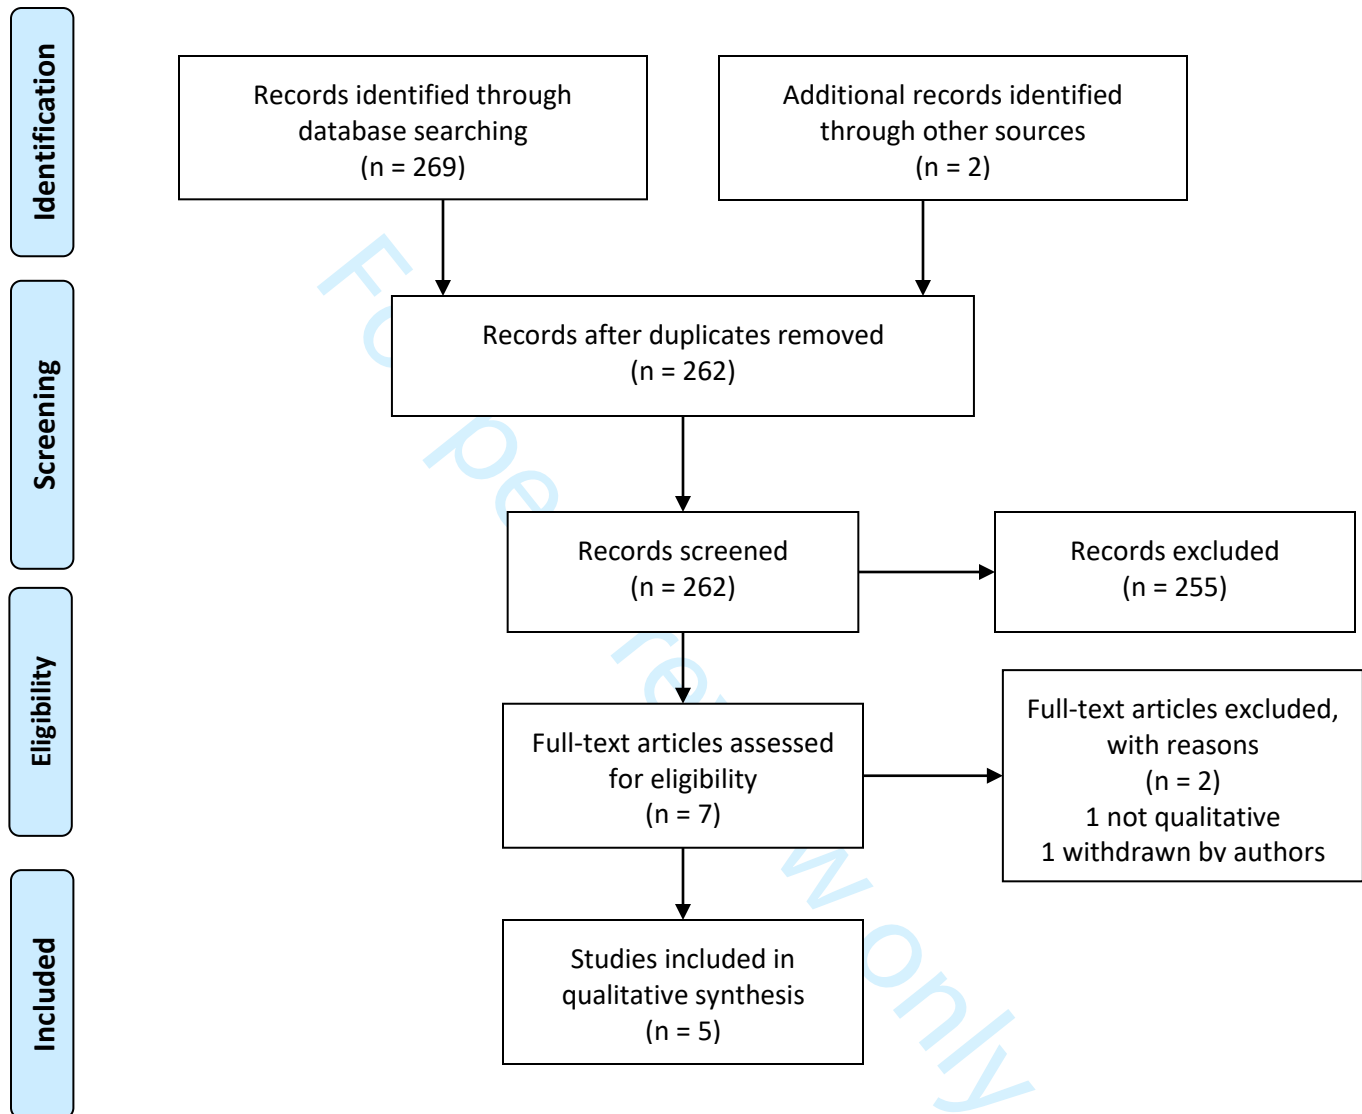

From: Moher D, Liberati A, Tetzlaff J, Altman DG, The PRISMA Group (2009). Preferred Reporting Items for Systematic Reviews and Meta-Analyses: The PRISMA Statement. PLoS Med 6(7): e1000097. doi:10.1371/journal.pmed1000097

For more information, visit [www.prisma-statement.org](http://www.prisma-statement.org).

For peer review only - <http://bmjopen.bmj.com/site/about/guidelines.xhtml>

1  
2  
3  
4  
5  
6  
7  
8  
9  
10  
11  
12  
13  
14  
15  
16  
17  
18  
19  
20  
21  
22  
23  
24  
25  
26  
27  
28  
29  
30

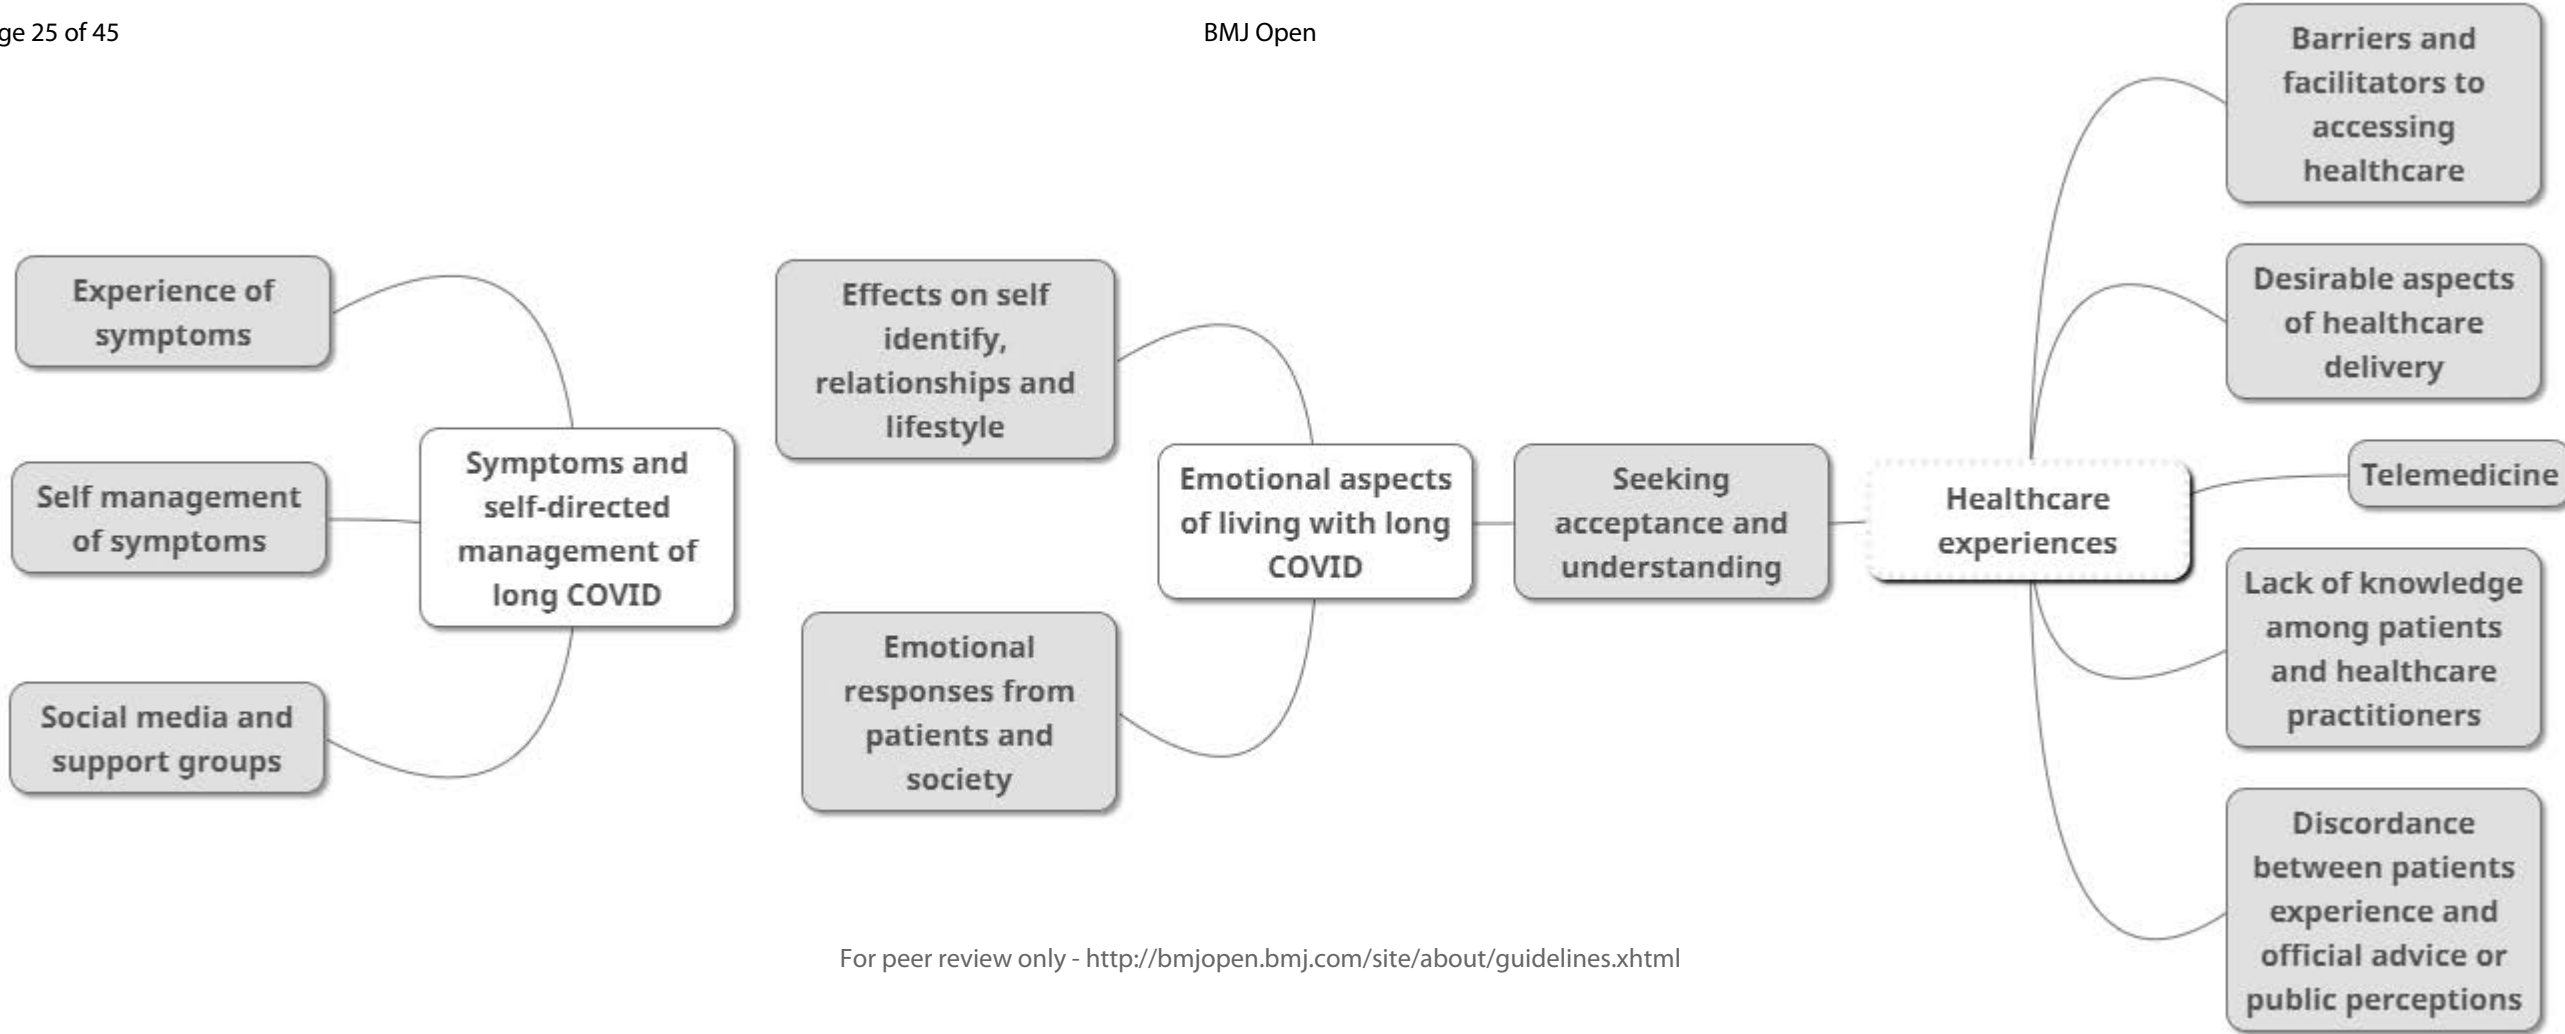



## SUPPLEMENTARY MATERIAL

### Supplementary file 1 Inclusion criteria

| Criteria              | Notes                                                                                                                                                                                                                                                    |
|-----------------------|----------------------------------------------------------------------------------------------------------------------------------------------------------------------------------------------------------------------------------------------------------|
| Population            | Adults and children experiencing new or ongoing symptoms: <ul style="list-style-type: none"> <li>• 4–12 weeks from onset of acute COVID-19 illness</li> <li>• 12 weeks from onset of acute COVID-19 illness</li> </ul>                                   |
| Phenomena of interest | Signs and symptoms of post-COVID-19 syndrome<br>Access to services<br>How symptoms were assessed<br>Management of symptoms and rehabilitation<br>Patient care pathway<br>Information and support provided<br>Communication with healthcare professionals |
| Comparators           | Not applicable                                                                                                                                                                                                                                           |
| Outcomes              | The outcomes will be generated using emergent coding, but are expected to include experiences, views and perceptions of individuals, families or carers on the factors of interest listed (such as Patient Reported Experience Measures)                 |
| Settings              | Any                                                                                                                                                                                                                                                      |
| Sub-groups            | Equality groups, for example, age, gender, ethnicity<br>Diagnosis of COVID-19 (e.g. confirmed or high clinical suspicion)<br>Duration of symptoms                                                                                                        |
| Study types           | Systematic reviews of qualitative studies<br>Qualitative studies that collect data from focus groups or interviews<br>Studies that collect qualitative data from questionnaires / surveys<br>Mixed method study designs (including qualitative element)  |
| Countries             | Any                                                                                                                                                                                                                                                      |
| Timepoints            | Any                                                                                                                                                                                                                                                      |
| Other exclusions      | None                                                                                                                                                                                                                                                     |

## Supplementary file 2 Sources searched and MEDLINE search strategy

|                                                                    |
|--------------------------------------------------------------------|
| <b>UK national health service and government websites</b>          |
| <a href="#">Public Health England</a>                              |
| <a href="#">Public Health Scotland</a>                             |
| <a href="#">Scottish Government</a>                                |
| <a href="#">UK Government</a>                                      |
| <b>National/international policy sources</b>                       |
| <a href="#">European Centre for Disease Control</a>                |
| <a href="#">Health Protection Scotland COVID-19 Compendium</a>     |
| <b>Guidelines</b>                                                  |
| <a href="#">National Institute of Health</a>                       |
| <a href="#">NICE</a>                                               |
| <a href="#">SIGN</a>                                               |
| <b>Evidence summaries and collections</b>                          |
| <a href="#">Analytical Collaboration for COVID-19</a>              |
| <a href="#">Cochrane Special Collection</a>                        |
| <a href="#">COVID-19 Best Evidence Front Door</a>                  |
| <a href="#">COVID-19 Evidence Reviews</a>                          |
| <a href="#">Evidence Aid Collection</a>                            |
| <a href="#">McMaster rapid review database</a>                     |
| <a href="#">Oxford Centre for Evidence-Based Medicine</a>          |
| <b>HTAs</b>                                                        |
| <a href="#">ECRI</a>                                               |
| <a href="#">Health Technology Wales</a>                            |
| <a href="#">National Institute for Health Research</a>             |
| <a href="#">NICE</a>                                               |
| <b>Specialist Databases</b>                                        |
| <a href="#">Epistemonikos</a>                                      |
| <a href="#">EPPI Centre: living systematic map of the evidence</a> |
| <a href="#">ProQuest</a>                                           |
| <a href="#">PubMed LitCovid</a>                                    |
| <a href="#">WHO database of publications</a>                       |
| <b>Preprints</b>                                                   |
| <a href="#">bioRxiv</a>                                            |
| <a href="#">medRxiv</a>                                            |
| <b>Research centres/organisations</b>                              |
| <a href="#">Campbell Collaboration</a>                             |
| <a href="#">Centre for Qualitative Research</a>                    |
| <a href="#">Health Foundation</a>                                  |
| <a href="#">King's Fund</a>                                        |
| <b>Patient issues</b>                                              |
| <a href="#">Carers UK</a>                                          |
| <a href="#">Health Talk</a>                                        |
| <a href="#">Involve</a>                                            |
| <a href="#">James Lind Alliance</a>                                |

|                                                                |
|----------------------------------------------------------------|
| <a href="#">King's Fund Patient Experience Blog</a>            |
| <a href="#">National Association for Patient Participation</a> |
| <a href="#">National Voices</a>                                |
| <a href="#">Our Covid Voices</a>                               |
| <a href="#">Patient UK Discussion Forums</a>                   |
| <a href="#">Patient Views</a>                                  |
| <a href="#">Patient Voices</a>                                 |
| <a href="#">Patients Association</a>                           |
| <a href="#">Picker Institute</a>                               |
| <b>Primary literature (bibliographic databases)</b>            |
| <a href="#">MEDLINE</a>                                        |
| <a href="#">PsycINFO</a>                                       |
| <a href="#">Web of Science</a>                                 |

### Medline search strategy

- 1 exp coronavirus/
- 2 exp Coronavirus Infections/
- 3 ((corona\* or corono\*) adj1 (virus\* or viral\* or virinae\*)).ti,ab,kw,kf.
- 4 (coronavirus\* or coronavir\* or coronavirinae\* or CoV).ti,ab,kw,kf.
- 5 ("2019-nCoV" or 2019nCoV or nCoV2019 or "nCoV-2019" or "COVID-19" or COVID19 or "CORVID-19" or CORVID19 or "WN-CoV" or WNCov or "HCoV-19" or HCoV19 or "2019 novel\*" or Ncov or "n-cov" or "SARS-CoV-2" or "SARSCoV-2" or "SARSCoV2" or "SARS-CoV2" or SARSCov19 or "SARS-Cov19" or "SARSCov-19" or "SARS-Cov-19" or Ncover or Ncorona\* or Ncorono\* or NcovWuhan\* or NcovHubei\* or NcovChina\* or NcovChinese\* or SARS2 or "SARS-2" or SARSCoronavirus2 or "SARS-coronavirus-2" or "SARSCoronavirus 2" or "SARS coronavirus2" or SARSCoronavirus2 or "SARS-coronavirus-2" or "SARSCoronavirus 2" or "SARS coronavirus2").ti,ab,kw,kf.
- 6 (((respiratory\* adj2 (symptom\* or disease\* or illness\* or condition\*)) or "seafood market\*" or "food market\*" or pneumonia\*) adj10 (Wuhan\* or Hubei\* or China\* or Chinese\* or Huanan\*)).ti,ab,kw,kf.
- 7 ((outbreak\* or wildlife\* or pandemic\* or epidemic\*) adj1 (China\* or Chinese\* or Huanan\*)).ti,ab,kw,kf.
- 8 "severe acute respiratory syndrome\*".ti,ab,kw,kf.
- 9 SARS Virus/
- 10 ("SARSCoV" or "SARS-CoV" or "SARS Cov" or SARSCoronavirus or "SARS-coronavirus" or "SARS coronavirus" or SARSCoronavirus or "SARS-coronavirus" or "SARS coronavirus").ti,ab,kw,kf.
- 11 Middle East Respiratory Syndrome Coronavirus/
- 12 "Middle East\* respiratory syndrome".ti,ab,kw,kf.
- 13 ("MERSCoV" or "MERS-CoV" or "MERS Cov" or MERSCoronavirus or "MERS - coronavirus" or "MERS coronavirus" or MERSCoronavirus or "MERS-coronavirus" or "MERS Coronavirus" or "camel flu").ti,ab,kw,kf.
- 14 or/1-13
- 15 exp Patient Satisfaction/
- 16 ((patient\* or carer\* or family) adj2 (experience\* or view\* or perspective\* or preference\* or attitude\* or expectation\* or satisfaction)).tw.

1  
2  
3  
4  
5  
6  
7  
8  
9  
10  
11  
12  
13  
14  
15  
16  
17  
18  
19  
20  
21  
22  
23  
24  
25  
26  
27  
28  
29  
30  
31  
32  
33  
34  
35  
36  
37  
38  
39  
40  
41  
42  
43  
44  
45  
46  
47  
48  
49  
50  
51  
52  
53  
54  
55  
56  
57  
58  
59  
60

17 15 or 16  
18 14 and 17

For peer review only

## Supplementary file 3 Summary of key themes relating to the views and experiences of patients, their families and carers

| Themes and sub-themes                     | Summary of sub-themes                                                                                  | Supporting example                                                                                                                                                                                                                                                                                                                                                                                                                                                                                                                                                        |
|-------------------------------------------|--------------------------------------------------------------------------------------------------------|---------------------------------------------------------------------------------------------------------------------------------------------------------------------------------------------------------------------------------------------------------------------------------------------------------------------------------------------------------------------------------------------------------------------------------------------------------------------------------------------------------------------------------------------------------------------------|
| <b>Theme: experience of symptoms</b>      |                                                                                                        |                                                                                                                                                                                                                                                                                                                                                                                                                                                                                                                                                                           |
| Range of symptoms                         | Patients described a wide range of symptoms, not all of which were recognised as symptoms of COVID-19. | <p>“The symptoms were like a game of whack-a-mole. Different ones would surge at different times and in different places in my body.” (Assaf <i>et al</i>)<sup>19</sup></p> <p>“From week four I started to get chest pains and then breathlessness, gradually other symptoms developed including dry mouth, sore tongue, joint pains, fatigue, rash and tachycardia.” (Maxwell)<sup>1</sup></p>                                                                                                                                                                          |
| Severity of symptoms                      | Symptoms ranged from mild to potentially life-threatening.                                             | <p>“I've been absolutely floored... I've got all sorts of... I've got vasculitis, which I think is a common thing... And I've been left with nerve issues, like really horrible nerve... stabbing pains in my hands and feet and I can't move my toes any more... unfortunately, my journey is far from over.” (Ladds <i>et al</i>)<sup>18</sup></p> <p>“From week four I started to get chest pains and then breathlessness, gradually other symptoms developed including dry mouth, sore tongue, joint pains, fatigue, rash and tachycardia.” (Maxwell)<sup>1</sup></p> |
| Duration and lingering nature of symptoms | Symptoms were experienced for a prolonged but variable length of time.                                 | “He was sleeping for about 20 hours a day, 20 hours out of every 24 and he's still sleeping now, five and half months after, he still sleeps an awful lot, sat up, not lay down, sat up, he's just totally exhausted.” (Kingstone <i>et al</i> ) <sup>17</sup>                                                                                                                                                                                                                                                                                                            |

1  
2  
3  
4  
5  
6  
7  
8  
9  
10  
11  
12  
13  
14  
15  
16  
17  
18  
19  
20  
21  
22  
23  
24  
25  
26  
27  
28  
29  
30  
31  
32  
33  
34  
35  
36  
37  
38  
39  
40  
41  
42  
43  
44  
45  
46

| Themes and sub-themes                                                                           | Summary of sub-themes                                                                                                                                                                                                                                                                           | Supporting example                                                                                                                                                                                                                                                                                                                                                                                                                                 |
|-------------------------------------------------------------------------------------------------|-------------------------------------------------------------------------------------------------------------------------------------------------------------------------------------------------------------------------------------------------------------------------------------------------|----------------------------------------------------------------------------------------------------------------------------------------------------------------------------------------------------------------------------------------------------------------------------------------------------------------------------------------------------------------------------------------------------------------------------------------------------|
| Fluctuating or cumulative nature of symptoms                                                    | Patients described symptoms ‘coming and going’, and of new symptoms being added to existing ones over time.                                                                                                                                                                                     | “...From week four I started to get chest pains and then breathlessness, gradually other symptoms developed .... The following weeks were frightening as symptoms fluctuated; sometimes thinking that you were improving and then very disheartening when they returned.... After nearly 6 months I have started to feel some improvement, although doing anything remotely physical results in a flare up of symptoms....” (Maxwell) <sup>1</sup> |
| <b>Theme: discordance between patient experiences and official advice or public perceptions</b> |                                                                                                                                                                                                                                                                                                 |                                                                                                                                                                                                                                                                                                                                                                                                                                                    |
| Disconnect between official advice and lived experience                                         | Patients found official advice on graded exercise and when to come out of isolation unhelpful and contrary to their lived experience of long COVID.                                                                                                                                             | “Well, one of the things that really bugged me about it was the talking about graded exercise and I’ve learnt from experience that pushing myself even a tiny bit has massive consequences ...” (Kingstone <i>et al</i> , p6) <sup>17</sup>                                                                                                                                                                                                        |
| Disconnect between public perception (“labels”) and lived experience                            | The perception that COVID-19 is a binary illness that is either ‘mild’ or very serious (requiring hospitalisation) was unhelpful and contrasted with patient experience.                                                                                                                        | “So, COVID-19, it’s either a mild infection or you die? No. But no one is prepared to think about us.” (Kingstone <i>et al</i> ) <sup>2</sup><br><br>“I think the term "mild" should be removed... I know that people who were admitted to the hospital were worse, but we who stayed home did not have MILD cases in all cases” (Maxwell) <sup>1</sup>                                                                                            |
| Disconnect between expected/official timeframes and lived experience                            | Patients expected COVID-19 to last approximately 2 weeks, in line with official estimates, and were then confronted by much longer-term illness. Patients experiencing symptoms beyond the 2-week period are often diagnosed with an alternative condition that more neatly fits the timeframe. | “I went back to work too soon and wish I hadn’t. Finally had to take a 5 week break in July/ August with the support of my employer. This helped a lot. I have now been back at work for 5 weeks and my symptoms have got worse to a degree.” (Davis <i>et al</i> ) <sup>16</sup>                                                                                                                                                                  |

| Themes and sub-themes                                                            | Summary of sub-themes                                                                                                                                                                     | Supporting example                                                                                                                                                                                                                                                                                                                                                                                                                                                                                                                                                                                                                                                                                                                                                                                                                             |
|----------------------------------------------------------------------------------|-------------------------------------------------------------------------------------------------------------------------------------------------------------------------------------------|------------------------------------------------------------------------------------------------------------------------------------------------------------------------------------------------------------------------------------------------------------------------------------------------------------------------------------------------------------------------------------------------------------------------------------------------------------------------------------------------------------------------------------------------------------------------------------------------------------------------------------------------------------------------------------------------------------------------------------------------------------------------------------------------------------------------------------------------|
| Disconnect between officially recognised symptoms and lived experience           | There is discordance between the range of symptoms articulated by patients with long-term illness and those officially recognised by authorities as COVID-19.                             | “If the message hadn’t been [to expect to recover in] around two weeks, I’d have been more cautious at first, ... the doctor I saw in A/E described Covid as the gift that keeps on giving and at four weeks I thought that felt like a long time, and now five months on it feels like a very long time” (Maxwell, p11) <sup>1</sup>                                                                                                                                                                                                                                                                                                                                                                                                                                                                                                          |
| Impact of disconnect between officially recognised symptoms and lived experience | As a consequence of the mismatch between officially recognised symptoms and lived experience of long COVID, patients feel ignored, dismissed, and may be misdiagnosed.                    | “Despite having been diagnosed with suspected Covid by my GP and a doctor in a Covid clinic (swab testing wasn’t available to the public at the time) and told I had pleurisy during a visit to A&E two weeks earlier, the doctor on duty didn’t take this into account. Instead, he dismissed me with anxiety, advising a course of anti-depressants, and chose not to investigate these concerning symptoms further. Of course I was anxious, but that was a consequence of the physical symptoms, not the cause! I would later learn from a neurologist that what I experienced on that day were clear neurological symptoms that should have been investigated promptly. To be brushed off like this when so little was known at the time of the damage Covid can cause was disheartening and very upsetting.” (Maxwell, p15) <sup>1</sup> |
| <b>Theme: self management of symptoms</b>                                        |                                                                                                                                                                                           |                                                                                                                                                                                                                                                                                                                                                                                                                                                                                                                                                                                                                                                                                                                                                                                                                                                |
| Self care and lifestyle adjustment                                               | Patients attempted various forms of self care, such as taking supplements, and made adjustments to their lifestyle, for example by reducing physical activity, to accommodate long COVID. | “I mean initially I started taking vitamin D. Had a joint vitamin C and zinc thing, which I didn’t take every day but I took some multivitamins, but then I was a bit unsure really ... my husband’s quite anti-vitamin use ... So anyway, then I took nothing for a while, and then I more recently started the vitamin D again, and I’m on                                                                                                                                                                                                                                                                                                                                                                                                                                                                                                   |

| Themes and sub-themes                                       | Summary of sub-themes                                                                                                                                                                    | Supporting example                                                                                                                                                                                                                                                                                              |
|-------------------------------------------------------------|------------------------------------------------------------------------------------------------------------------------------------------------------------------------------------------|-----------------------------------------------------------------------------------------------------------------------------------------------------------------------------------------------------------------------------------------------------------------------------------------------------------------|
|                                                             |                                                                                                                                                                                          | B12 just because of all the burning in my feet ... and a probiotic and some omega-3." (Kingstone <i>et al</i> ) <sup>17</sup>                                                                                                                                                                                   |
| Pacing and goal setting                                     | The importance of pacing yourself and setting realistic goals was highlighted by patients.                                                                                               | "...I really have to pace myself... I couldn't do two or three household chores back to back, I have to do a chore, sit down for 15, 20 minutes and then do the next, which frustrates me...." (Kingstone <i>et al</i> ) <sup>17</sup>                                                                          |
| <b>Theme: emotional responses from patients and society</b> |                                                                                                                                                                                          |                                                                                                                                                                                                                                                                                                                 |
| Helplessness                                                | Long-term symptoms were associated with a feeling of helplessness.                                                                                                                       | "Most participants continued the discussion after the digital recorder was turned off, emphasising their own feelings of helplessness, but also alluding to the uncertainty and helplessness that GPs had admitted to" (Kingstone <i>et al</i> ) <sup>17</sup> [Author quote]                                   |
| Anxiety                                                     | Patients described anxiety about the prospect of not recovering, uncertainty over the cause of symptoms, not being believed, and some of the content they read on online support groups. | "... I was really frightened, terrified and just thought I might die on a couple of occasions ... maybe not "I'm going to die right now", but definitely "I'm never going to get better from this" kind of feeling." (Kingstone <i>et al</i> ) <sup>17</sup>                                                    |
| Relief                                                      | A sense of relief was associated with finding a healthcare professional that believed the patient.                                                                                       | "I finally found a GP who took me seriously last Saturday when I was at the point of crying talking to her, just understanding that people's symptoms are real and diverse." (Maxwell) <sup>1</sup>                                                                                                             |
| Stigma (externally generated)                               | Employers and others drive a fear of being stigmatised over long COVID.                                                                                                                  | "Healthcare staff was fearful and I was turned away with no support" (Assaf <i>et al</i> ) <sup>19</sup><br><br>"I had to take two weeks off, had to work from home for four, but had to return for two weeks with fever as my employer would not give me more time [...]." (Davis <i>et al</i> ) <sup>16</sup> |



| Themes and sub-themes                                               | Summary of sub-themes                                                                                                                                   | Supporting example                                                                                                                                                                                                                                                                                                                                                                                                                                                                                                                                                                                                                                                                                    |
|---------------------------------------------------------------------|---------------------------------------------------------------------------------------------------------------------------------------------------------|-------------------------------------------------------------------------------------------------------------------------------------------------------------------------------------------------------------------------------------------------------------------------------------------------------------------------------------------------------------------------------------------------------------------------------------------------------------------------------------------------------------------------------------------------------------------------------------------------------------------------------------------------------------------------------------------------------|
| Stigma (internally generated)                                       | Patients experienced a sense of shame and blame consistent with stigma.                                                                                 | "Fearful of people around me finding out and overreacting / treating me differently" (Assaf <i>et al</i> ) <sup>19</sup>                                                                                                                                                                                                                                                                                                                                                                                                                                                                                                                                                                              |
| <b>Theme: effects on self-identity, relationships and lifestyle</b> |                                                                                                                                                         |                                                                                                                                                                                                                                                                                                                                                                                                                                                                                                                                                                                                                                                                                                       |
| Impact on self-identify                                             | Long COVID affected self identity as a healthy, independent individual, and resulted in patients comparing themselves with a pre-COVID version of self. | "I have not had strength to return to physical activity. I did work in my house and 2 days later had a fever again after being 12 days fever free." (Assaf <i>et al</i> ) <sup>19</sup>                                                                                                                                                                                                                                                                                                                                                                                                                                                                                                               |
| Impact on daily life/work                                           | Patients had to alter their physical activity levels to accommodate long COVID and found cognitive symptoms prevented a return to work.                 | <p>"I'm trapped, in that I can't park that far away and walk [to the shops] like I normally would because I can't do hills. I can just, in the last couple of weeks, I can do gentle inclines now, but I sort of grind to a halt on a hill. So, it's very limiting." (Ladds <i>et al</i>)<sup>18</sup></p> <p>"I wasn't just fogged, I was confused. I had a very difficult encounter as a result of just being confused about things and that took a long time to resolve. I love words and I enjoy the business of communicating, and I felt that part of my life was lost. Really, I just did admin, I didn't do anything that required clear thinking." (Kingstone <i>et al</i>)<sup>17</sup></p> |
| Impact on self - reduced confidence                                 | There was a sense of loss of confidence in professional abilities among some patients.                                                                  | "Doctors and other clinicians .... described how their symptoms and the accompanying prognostic uncertainty .... had also stripped them of confidence in their professional abilities." (Ladds <i>et al</i> ) <sup>18</sup> [Author quote]                                                                                                                                                                                                                                                                                                                                                                                                                                                            |
| Impact on others/relationships                                      | Long COVID had an impact on family members as well as patients.                                                                                         | "I think, at first, they just thought, "Oh, for god's sake, she's napping again." I feel like I constantly have to explain. I'm just exhausted and I just want to know why I'm so exhausted .... I used to enjoy running, and                                                                                                                                                                                                                                                                                                                                                                                                                                                                         |

1  
2  
3  
4  
5  
6  
7  
8  
9  
10  
11  
12  
13  
14  
15  
16  
17  
18  
19  
20  
21  
22  
23  
24  
25  
26  
27  
28  
29  
30  
31  
32  
33  
34  
35  
36  
37  
38  
39  
40  
41  
42  
43  
44  
45  
46

| Themes and sub-themes                                       | Summary of sub-themes                                                                                       | Supporting example                                                                                                                                                                                                                                                                                                                                                                                                                                                                                                                                                                                                                                                                                                                                                                                                                                                                                                                                                                                                                                                                                                                                                    |
|-------------------------------------------------------------|-------------------------------------------------------------------------------------------------------------|-----------------------------------------------------------------------------------------------------------------------------------------------------------------------------------------------------------------------------------------------------------------------------------------------------------------------------------------------------------------------------------------------------------------------------------------------------------------------------------------------------------------------------------------------------------------------------------------------------------------------------------------------------------------------------------------------------------------------------------------------------------------------------------------------------------------------------------------------------------------------------------------------------------------------------------------------------------------------------------------------------------------------------------------------------------------------------------------------------------------------------------------------------------------------|
|                                                             |                                                                                                             | exercising, and stuff like that. I rarely even go on walks now because I know if I walk to the end of the street, they're [lungs] going to start hurting." (Kingstone <i>et al</i> ) <sup>17</sup>                                                                                                                                                                                                                                                                                                                                                                                                                                                                                                                                                                                                                                                                                                                                                                                                                                                                                                                                                                    |
| <b>Theme: healthcare access – barriers and facilitators</b> |                                                                                                             |                                                                                                                                                                                                                                                                                                                                                                                                                                                                                                                                                                                                                                                                                                                                                                                                                                                                                                                                                                                                                                                                                                                                                                       |
| Barrier - testing                                           | Challenges were experienced with accessing testing (for long-term symptoms or COVID-19 diagnostic testing). | "... My worst and scariest experience with this illness was in week 6, when I was rushed to A&E as I had a sudden relapse of symptoms and found myself gasping for air, with the top of my head numb and tingling and a headache so blinding that I couldn't keep my eyes open. I got worse in the hospital and was shaking visibly, so much so that the nurse couldn't perform an ECG as I just couldn't stay still. Despite having been diagnosed with suspected Covid by my GP and a doctor in a Covid clinic (swab testing wasn't available to the public at the time) and told I had pleurisy during a visit to A&E two weeks earlier, the doctor on duty didn't take this into account. Instead, he dismissed me with anxiety, advising a course of anti-depressants, and chose not to investigate these concerning symptoms further. ....I would later learn from a neurologist that what I experienced on that day were clear neurological symptoms that should have been investigated promptly. To be brushed off like this when so little was known at the time of the damage Covid can cause was disheartening and very upsetting." (Maxwell) <sup>1</sup> |

| Themes and sub-themes                                   | Summary of sub-themes                                                                                                                                                      | Supporting example                                                                                                                                                                                                                                                                                                                                                                                                                                     |
|---------------------------------------------------------|----------------------------------------------------------------------------------------------------------------------------------------------------------------------------|--------------------------------------------------------------------------------------------------------------------------------------------------------------------------------------------------------------------------------------------------------------------------------------------------------------------------------------------------------------------------------------------------------------------------------------------------------|
| Barrier – primary care                                  | Difficulties accessing primary care, particularly face-to-face or through the ‘total triage’ system were a barrier to healthcare access                                    | “I was initially contacting a certain GP, and that GP literally just went “you need to stay at home and rest, there’s nothing we can do”, a.....so I started contacting a different GP, in the same practice, and it’s the same outcome, they can’t do anything else but he seems to be interested and wants to know what’s going on.” (Kingstone <i>et al</i> ) <sup>17</sup>                                                                         |
| Barrier – effort involved                               | Accessing healthcare was complex, difficult and exhausting for patients.                                                                                                   | “One day I had blue finger nails and I wasn’t cold .... and I phoned the GP and the GP answer phone said if you’ve got any of the signs of, of Covid please ring 111 and so I rang 111 and, I live in [city with high incidence of Covid-19] I don’t know if that makes any difference but I was put on hold and after over an hour, an hour and twenty minutes nobody answered so I just put the phone down ....” (Ladds <i>et al</i> ) <sup>18</sup> |
| Barrier – specialist referral                           | Few patients managed to obtain a referral to a specialist.                                                                                                                 | “...three of the referrals my GP made (two respiratory and one neurology) were refused by two different hospitals on the grounds that a) they only checked Covid confirmed patients b) that they needed extra tests which weren’t done on me at A&E” (Maxwell) <sup>1</sup>                                                                                                                                                                            |
| Perceived barrier – healthcare professionals being busy | There was a perception that healthcare professionals are too busy caring for patients with acute COVID-19 to be able to provide care for patients with long-term symptoms. | “At this point, most physicians and researchers are so overwhelmed treating the covid19 patients who are at risk of immediate death, that they don’t have the ability to even recognize that people like me exist....” (Assaf <i>et al</i> ) <sup>19</sup><br><br>“I think the message to avoid hospital and the GP unless you had specific symptoms was very unhelpful,                                                                               |

| Themes and sub-themes                                 | Summary of sub-themes                                                                                                                                                                                                                                                                                                                                                                                                                                            | Supporting example                                                                                                                                                                                                                                                                                                                                                                                    |
|-------------------------------------------------------|------------------------------------------------------------------------------------------------------------------------------------------------------------------------------------------------------------------------------------------------------------------------------------------------------------------------------------------------------------------------------------------------------------------------------------------------------------------|-------------------------------------------------------------------------------------------------------------------------------------------------------------------------------------------------------------------------------------------------------------------------------------------------------------------------------------------------------------------------------------------------------|
|                                                       |                                                                                                                                                                                                                                                                                                                                                                                                                                                                  | particularly as I didn't have, and never have had, a cough or fever" (Maxwell) <sup>1</sup>                                                                                                                                                                                                                                                                                                           |
| Perceived barrier – healthcare entitlement            | Patients had a perception that they were not entitled to healthcare for long-term symptoms of COVID-19.                                                                                                                                                                                                                                                                                                                                                          | “...I guess I felt a bit like I was ineligible for health care now. I felt like I'm just going to have to live with this at home and no one will come and see me and, you know, I'm just, yeah. It was a horrible feeling.” (Kingstone <i>et al</i> ) <sup>17</sup>                                                                                                                                   |
| Facilitator – follow-ups & check-ins                  | Regular follow up or check-in with patients with long-term symptoms was viewed as a positive aspect of healthcare.                                                                                                                                                                                                                                                                                                                                               | “... I think for the first five days after I called her she had a daily check in call with me to monitor how I'm doing so it was like a ten minute phone call every day for the first five days” (Ladds <i>et al</i> ) <sup>18</sup>                                                                                                                                                                  |
| Things patients did to access care                    | Patients engaged in a number of activities to improve their access to healthcare including: <ul style="list-style-type: none"> <li>• taking the lead in arranging consultations and "circumventing bottlenecks"</li> <li>• deliberately manipulating inflexible algorithm-driven systems to access referrals</li> <li>• accessing private healthcare to prompt NHS follow up, conducting their own research and constructing their own care pathways.</li> </ul> | “did the e-consult – I had to do it a couple of times – I kind of learned to answer the questions to get it to send a message to my GP surgery... If you say you've got heart palpitations or breathlessness it's telling you to call 111 which I didn't want to do. And so I had to downplay symptoms [laughs] to get through. I cancelled it and did it again.” (Ladds <i>et al</i> ) <sup>18</sup> |
| <b>Theme: telemedicine - limitations and benefits</b> |                                                                                                                                                                                                                                                                                                                                                                                                                                                                  |                                                                                                                                                                                                                                                                                                                                                                                                       |
| Limitation – remote consultation                      | Remote consulting was found to limit access to GPs and to restrict communication of symptoms.                                                                                                                                                                                                                                                                                                                                                                    | “... reassure me are things where I need my body actually checking which I don't think you could check online, you can't check for blood clots online, you can't check for neurological damage online can you?” (Kingstone <i>et al</i> ) <sup>17</sup>                                                                                                                                               |

| Themes and sub-themes                                                                                      | Summary of sub-themes                                                                                       | Supporting example                                                                                                                                                                                                                                                                                                                                                                                                                      |
|------------------------------------------------------------------------------------------------------------|-------------------------------------------------------------------------------------------------------------|-----------------------------------------------------------------------------------------------------------------------------------------------------------------------------------------------------------------------------------------------------------------------------------------------------------------------------------------------------------------------------------------------------------------------------------------|
| Limitation – lack of continuity                                                                            | Loss of continuity of care was particularly impactful on patients with complex presentations.               | “The focus when you do get a new GP speaking to you seems to be that they go back to the beginning ....And I think if there was the same GP who we are able to consult regularly they would build a picture of your baseline and I think that’s what’s lost with digital ways of working.” (Ladds <i>et al</i> ) <sup>18</sup>                                                                                                          |
| Limitation – protocolised care                                                                             | Strict adherence to protocols in the telemedicine context affected patient safety and led to mismanagement. | “... I remembered ringing my GP from the floor on my lounge laying on my front and kind of saying I’m really short of breath, you know, do you think I should try an inhaler do I need to go back to A&E and I was kind of told well you don’t really sound too out of breath over the phone .... I really felt at that point right if you could see me you would see that I am really like broken” (Ladds <i>et al</i> ) <sup>18</sup> |
| Benefits - accessibility                                                                                   | Positive experiences of accessing GPs through telemedicine.                                                 | “My doctor was available via messaging, telephone, and telemedicine. She also contracted COVID-19 so she shared her experience with recovery and it helped me stay calm that I was on the right track.” (Assaf <i>et al</i> ) <sup>19</sup>                                                                                                                                                                                             |
| <b>Theme: lack of knowledge, information and understanding among healthcare professionals and patients</b> |                                                                                                             |                                                                                                                                                                                                                                                                                                                                                                                                                                         |
| Lack of knowledge - healthcare professionals                                                               | There is a perceived lack of knowledge about long COVID among healthcare professionals.                     | “...I think all the way through I found doctors that I've come into contact with are just really at a bit of a loss for it. I think at the beginning, particularly when things were going on, and not clearing up it was kind of put on me as just being a strange case ... and my GP was going, “Well, you're just weird, you know”.’ (Kingstone <i>et al</i> ) <sup>17</sup>                                                          |

| Themes and sub-themes            | Summary of sub-themes                                                                                                                                                                                                                                                                                          | Supporting example                                                                                                                                                                                                                                                                                                                                                                                                                                 |
|----------------------------------|----------------------------------------------------------------------------------------------------------------------------------------------------------------------------------------------------------------------------------------------------------------------------------------------------------------|----------------------------------------------------------------------------------------------------------------------------------------------------------------------------------------------------------------------------------------------------------------------------------------------------------------------------------------------------------------------------------------------------------------------------------------------------|
| Lack of knowledge – symptoms     | The lack of knowledge around long COVID included uncertainty about the expected symptoms, wanting to learn about living with COVID-19, uncertainty about the cause of symptoms, a lack of understanding about the fluctuating nature of symptoms and lack of knowledge about recovery from long-term symptoms. | “None of us knew this [the symptoms] because we’re all on our own, in a little bubble, thinking I’m the only one. Why am I the one who has still got it?” (Maxwell) <sup>1</sup>                                                                                                                                                                                                                                                                   |
| Lack of knowledge – seeking help | Uncertainty about when patients with long COVID should seek medical help.                                                                                                                                                                                                                                      | “...combined with the UK government message to stay away from health services unless very ill, left many people uncertain about when they should seek help.” (Maxwell) <sup>1</sup> [Author quote]                                                                                                                                                                                                                                                 |
| Lack of knowledge – employers    | Employers need advice on how to manage employees with long COVID.                                                                                                                                                                                                                                              | “Advice on the range of symptoms and duration was also needed by employers who are unclear what to expect of those with ongoing effects.” (Maxwell) <sup>1</sup> [Author quote]<br><br>“I have needed more-flexible hours (working remotely) post-COVID. That way, I can rest as needed throughout the day. If I had to return to in-person work at this point, it would be severely reduced hours if at all.” (Davis <i>et al</i> ) <sup>16</sup> |
| Lack of knowledge – management   | Lack of knowledge about managing long COVID, resources available locally for patient rehabilitation, and about recovery from prolonged illness.                                                                                                                                                                | “I finally had a respiratory appointment three months later, over the phone (not over a video link). I was .... recommended graded exercise. When I then saw a rehabilitation physiotherapist, she said no, we are not going to do graded exercise because that would be counterproductive for you. ” (Maxwell) <sup>1</sup>                                                                                                                       |

| Themes and sub-themes                                                                                         | Summary of sub-themes                                                                                                              | Supporting example                                                                                                                                                                                                                                                                                                                                                                                                                               |
|---------------------------------------------------------------------------------------------------------------|------------------------------------------------------------------------------------------------------------------------------------|--------------------------------------------------------------------------------------------------------------------------------------------------------------------------------------------------------------------------------------------------------------------------------------------------------------------------------------------------------------------------------------------------------------------------------------------------|
| Lack of knowledge – prompts help-seeking from other sources                                                   | Lack of widely accessible medical knowledge about long COVID has led to patient reliance on news and social media for information. | “At least I know I'm not alone. And I think people who actually have had the disease tend to know a little bit more about it. So, you know, sixth sense, I actually think that the support group has given more knowledge than the doctors have.” (Ladds <i>et al</i> ) <sup>18</sup>                                                                                                                                                            |
| Patients prefer healthcare professionals to admit uncertainty                                                 | Patients would prefer healthcare professionals to admit to a lack of knowledge about long COVID.                                   | “She just listens a little bit more to what I'm saying and she's much more willing to say, “Of course, we don't really know what's going on because it's a new virus.” She doesn't try to pretend that she understands what's going on, which is good.” (Kingstone <i>et al</i> ) <sup>17</sup>                                                                                                                                                  |
| <b>Theme: desirable features of healthcare services/service delivery</b>                                      |                                                                                                                                    |                                                                                                                                                                                                                                                                                                                                                                                                                                                  |
| Healthcare structuring – one stop clinics with face-to-face assessment of symptoms by multidisciplinary teams | Patients wanted a ‘one-stop’ clinic with multidisciplinary teams there to assess symptoms affecting a wide range of body systems.  | “What would be most helpful is if all main hospitals could have a Covid clinic that had experts from respiratory, cardiology, rheumatology, neurology, physiotherapy etc, so you could go along for half a day and see people from these different departments, they can refer you for tests and you can get a plan in place, We are having such a range of symptoms that GPs are struggling to know what to do with you” (Maxwell) <sup>1</sup> |
| Healthcare structuring – case management                                                                      | A case manager or single clinician to co-ordinate investigations and the patient care pathway for each patient with long COVID.    | “... there was a view that it would be helpful if people living with Covid19 could have a ‘quarter back’ or case manager to oversee and coordinate investigations and support services across different medical specialities.” (Maxwell) <sup>1</sup>                                                                                                                                                                                            |
| Healthcare structuring – MDT rehabilitation                                                                   | Assessment by a multidisciplinary rehabilitation team was proposed.                                                                | “... the British Society of Rehabilitation Medicine notes there are people who were never admitted to hospital but who still have ongoing needs for rehabilitation                                                                                                                                                                                                                                                                               |

| Themes and sub-themes                                                      | Summary of sub-themes                                                                                                                      | Supporting example                                                                                                                                                                                                                                           |
|----------------------------------------------------------------------------|--------------------------------------------------------------------------------------------------------------------------------------------|--------------------------------------------------------------------------------------------------------------------------------------------------------------------------------------------------------------------------------------------------------------|
|                                                                            |                                                                                                                                            | support after recovering from Covid, or Covid-like symptoms." (Maxwell) <sup>1</sup> [Author quote]                                                                                                                                                          |
| Individual - acceptance of patient experiences by healthcare professionals | Empathetic health professionals that accepted patient experiences were desirable to individuals.                                           | "I finally found a GP who took me seriously last Saturday when I was at the point of crying talking to her, just understanding that people's symptoms are real and diverse." (Maxwell) <sup>1</sup>                                                          |
| Individual - practical coping strategies                                   | Patients wanted practical advice on coping strategies.                                                                                     | "... members understood that there were no magic cures, but were looking for practical advice on coping strategies that go beyond basic advice." (Maxwell) <sup>1</sup> [Author quote]                                                                       |
| <b>Theme: social media and support groups</b>                              |                                                                                                                                            |                                                                                                                                                                                                                                                              |
| Support through sharing experiences                                        | Online support groups and social media provided opportunities for sharing experiences of long COVID.                                       | "when I found the Long Covid Facebook group that I realised I wasn't alone, thousands of people were in the same situation. Knowing this helped enormously." (Maxwell) <sup>1</sup>                                                                          |
| Support through sharing knowledge                                          | Online support groups and social media provided opportunities for sharing knowledge and resource links with others coping with long COVID. | "At least I know I'm not alone. And I think people who actually have had the disease tend to know a little bit more about it... I actually think that the support group has given more knowledge than the doctors have." (Ladds <i>et al</i> ) <sup>18</sup> |
| Validation of experiences                                                  | Patients found validation of their experiences in communication with others through online support groups.                                 | "many participants – both men and women – found that online peer support groups offered the greatest source of support through shared experiences, knowledge and validation." (Ladds <i>et al</i> ) <sup>18</sup> [Author quote]                             |
| <b>Theme: seeking acceptance and understanding</b>                         |                                                                                                                                            |                                                                                                                                                                                                                                                              |
| Perception of being doubted by healthcare professionals                    | Healthcare professionals were perceived to doubt patient symptoms were related to COVID-19 and to doubt symptom severity.                  | "There was one GP who just thought it was all anxiety ... she said, "There's nothing wrong with your lungs. This is all anxiety. You must treat your anxiety. There's                                                                                        |



| Themes and sub-themes                                    | Summary of sub-themes                                                                                                             | Supporting example                                                                                                                                                                                                                                                                                                                                                                                                                                                         |
|----------------------------------------------------------|-----------------------------------------------------------------------------------------------------------------------------------|----------------------------------------------------------------------------------------------------------------------------------------------------------------------------------------------------------------------------------------------------------------------------------------------------------------------------------------------------------------------------------------------------------------------------------------------------------------------------|
|                                                          |                                                                                                                                   | nothing wrong with you. How are you going to manage the pandemic if you don't treat your anxiety?" That was really upsetting because I knew I was short of breath..." (Kingstone <i>et al</i> ) <sup>17</sup>                                                                                                                                                                                                                                                              |
| Perception of being doubted by friends and family        | There was a perception that friends and family doubted patients because symptoms were not always obvious.                         | "... one of my friends did say after quite a while, "I'm not being awful, but do you think a lot of it's in his mind?" and I said "no". I was quite upset about that..." (Kingstone <i>et al</i> ) <sup>17</sup>                                                                                                                                                                                                                                                           |
| Perception of being ignored                              | Patients felt that their condition was not given the recognition that it deserved.                                                | "So, COVID-19, it's either a mild infection or you die? No. But no one is prepared to think about us." (Kingstone <i>et al</i> ) <sup>17</sup><br><br>"I felt the medical team was dismissive. There were a lot of 'we don't know.' Which is understandable, but difficult." (Assaf <i>et al</i> ) <sup>19</sup>                                                                                                                                                           |
| Difficulties finding empathetic healthcare professionals | Challenges were described in finding healthcare professionals willing to show empathy and accept patient experiences of symptoms. | "I was initially contacting a certain GP, and that GP literally just went "you need to stay at home and rest, there's nothing we can do", and that frustrated me because it didn't seem like they were being caring, it felt like I was nagging them and being a hypochondriac..." (Kingstone <i>et al</i> ) <sup>17</sup><br><br>"Because I've spoken to four different GPs throughout this. I've not found them very helpful..." (Kingstone <i>et al</i> ) <sup>17</sup> |
| Misdiagnosis or dismissal by healthcare professionals    | Dismissal of symptoms or misdiagnoses were associated with a negative perception of healthcare.                                   | "I was initially contacting a certain GP, and that GP literally just went "you need to stay at home and rest, there's nothing we can do", and that frustrated me because it didn't seem like they were being caring, it                                                                                                                                                                                                                                                    |

1  
2  
3  
4  
5  
6  
7  
8  
9  
10  
11  
12  
13  
14  
15  
16  
17  
18  
19  
20  
21  
22  
23  
24  
25  
26  
27  
28  
29  
30  
31  
32  
33  
34  
35  
36  
37  
38  
39  
40  
41  
42  
43  
44  
45  
46

| Themes and sub-themes                                                                                                  | Summary of sub-themes                                                                                                                                 | Supporting example                                                                                                                                                                                                                                                                                                                                         |
|------------------------------------------------------------------------------------------------------------------------|-------------------------------------------------------------------------------------------------------------------------------------------------------|------------------------------------------------------------------------------------------------------------------------------------------------------------------------------------------------------------------------------------------------------------------------------------------------------------------------------------------------------------|
|                                                                                                                        |                                                                                                                                                       | felt like I was nagging them and being a hypochondriac and that’s how I was being treated...” (Kingstone <i>et al</i> ) <sup>17</sup>                                                                                                                                                                                                                      |
| When available strong empathetic relationships with healthcare professionals provides strong therapeutic relationships | A minority of patients reported strong therapeutic relationships involving listening, empathy, validation, honesty and arranging tests and follow up. | “... actually just the experience of being heard and feeling like somebody got it and was being kind about it, but you know it was okay that they couldn’t do anything, I just kind of needed to know that I wasn’t losing it really and it was real what I was experiencing, I think so that was really helpful.” (Kingstone <i>et al</i> ) <sup>17</sup> |

1  
2  
3  
4  
5  
6  
7  
8  
9  
10  
11  
12  
13  
14  
15  
16  
17  
18  
19  
20  
21  
22  
23  
24  
25  
26  
27  
28  
29  
30  
31  
32  
33  
34  
35  
36  
37  
38  
39  
40  
41  
42  
43  
44  
45  
46

For peer review only

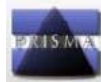

# PRISMA 2009 Checklist

| Section/topic                      | #  | Checklist item                                                                                                                                                                                                                                                                                              | Reported on page #   |
|------------------------------------|----|-------------------------------------------------------------------------------------------------------------------------------------------------------------------------------------------------------------------------------------------------------------------------------------------------------------|----------------------|
| <b>TITLE</b>                       |    |                                                                                                                                                                                                                                                                                                             |                      |
| Title                              | 1  | Identify the report as a systematic review, meta-analysis, or both.                                                                                                                                                                                                                                         | 1                    |
| <b>ABSTRACT</b>                    |    |                                                                                                                                                                                                                                                                                                             |                      |
| Structured summary                 | 2  | Provide a structured summary including, as applicable: background; objectives; data sources; study eligibility criteria, participants, and interventions; study appraisal and synthesis methods; results; limitations; conclusions and implications of key findings; systematic review registration number. | 2                    |
| <b>INTRODUCTION</b>                |    |                                                                                                                                                                                                                                                                                                             |                      |
| Rationale                          | 3  | Describe the rationale for the review in the context of what is already known.                                                                                                                                                                                                                              | 3                    |
| Objectives                         | 4  | Provide an explicit statement of questions being addressed with reference to participants, interventions, comparisons, outcomes, and study design (PICOS).                                                                                                                                                  | 4                    |
| <b>METHODS</b>                     |    |                                                                                                                                                                                                                                                                                                             |                      |
| Protocol and registration          | 5  | Indicate if a review protocol exists, if and where it can be accessed (e.g., Web address), and, if available, provide registration information including registration number.                                                                                                                               | 4                    |
| Eligibility criteria               | 6  | Specify study characteristics (e.g., PICOS, length of follow-up) and report characteristics (e.g., years considered, language, publication status) used as criteria for eligibility, giving rationale.                                                                                                      | 4                    |
| Information sources                | 7  | Describe all information sources (e.g., databases with dates of coverage, contact with study authors to identify additional studies) in the search and date last searched.                                                                                                                                  | 4                    |
| Search                             | 8  | Present full electronic search strategy for at least one database, including any limits used, such that it could be repeated.                                                                                                                                                                               | Supplementary file 2 |
| Study selection                    | 9  | State the process for selecting studies (i.e., screening, eligibility, included in systematic review, and, if applicable, included in the meta-analysis).                                                                                                                                                   | 5                    |
| Data collection process            | 10 | Describe method of data extraction from reports (e.g., piloted forms, independently, in duplicate) and any processes for obtaining and confirming data from investigators.                                                                                                                                  | 5                    |
| Data items                         | 11 | List and define all variables for which data were sought (e.g., PICOS, funding sources) and any assumptions and simplifications made.                                                                                                                                                                       | 5                    |
| Risk of bias in individual studies | 12 | Describe methods used for assessing risk of bias of individual studies (including specification of whether this was done at the study or outcome level), and how this information is to be used in any data synthesis.                                                                                      | 5                    |
| Summary measures                   | 13 | State the principal summary measures (e.g., risk ratio, difference in means).                                                                                                                                                                                                                               | 5                    |
| Synthesis of results               | 14 | Describe the methods of handling data and combining results of studies, if done, including measures of consistency (e.g., $I^2$ ) for each meta-analysis.                                                                                                                                                   | 5                    |

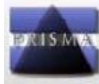

# PRISMA 2009 Checklist

Page 1 of 2

| Section/topic                 | #  | Checklist item                                                                                                                                                                                           | Reported on page #   |
|-------------------------------|----|----------------------------------------------------------------------------------------------------------------------------------------------------------------------------------------------------------|----------------------|
| Risk of bias across studies   | 15 | Specify any assessment of risk of bias that may affect the cumulative evidence (e.g., publication bias, selective reporting within studies).                                                             | 6                    |
| Additional analyses           | 16 | Describe methods of additional analyses (e.g., sensitivity or subgroup analyses, meta-regression), if done, indicating which were pre-specified.                                                         | n/a                  |
| <b>RESULTS</b>                |    |                                                                                                                                                                                                          |                      |
| Study selection               | 17 | Give numbers of studies screened, assessed for eligibility, and included in the review, with reasons for exclusions at each stage, ideally with a flow diagram.                                          | 6 and PRISMA diagram |
| Study characteristics         | 18 | For each study, present characteristics for which data were extracted (e.g., study size, PICOS, follow-up period) and provide the citations.                                                             | 19                   |
| Risk of bias within studies   | 19 | Present data on risk of bias of each study and, if available, any outcome level assessment (see item 12).                                                                                                | 21                   |
| Results of individual studies | 20 | For all outcomes considered (benefits or harms), present, for each study: (a) simple summary data for each intervention group (b) effect estimates and confidence intervals, ideally with a forest plot. | 7                    |
| Synthesis of results          | 21 | Present results of each meta-analysis done, including confidence intervals and measures of consistency.                                                                                                  | n/a                  |
| Risk of bias across studies   | 22 | Present results of any assessment of risk of bias across studies (see Item 15).                                                                                                                          | 6                    |
| Additional analysis           | 23 | Give results of additional analyses, if done (e.g., sensitivity or subgroup analyses, meta-regression [see Item 16]).                                                                                    | n/a                  |
| <b>DISCUSSION</b>             |    |                                                                                                                                                                                                          |                      |
| Summary of evidence           | 24 | Summarize the main findings including the strength of evidence for each main outcome; consider their relevance to key groups (e.g., healthcare providers, users, and policy makers).                     | 12                   |
| Limitations                   | 25 | Discuss limitations at study and outcome level (e.g., risk of bias), and at review-level (e.g., incomplete retrieval of identified research, reporting bias).                                            | 12                   |
| Conclusions                   | 26 | Provide a general interpretation of the results in the context of other evidence, and implications for future research.                                                                                  | 13                   |
| <b>FUNDING</b>                |    |                                                                                                                                                                                                          |                      |
| Funding                       | 27 | Describe sources of funding for the systematic review and other support (e.g., supply of data); role of funders for the systematic review.                                                               | 14                   |

41

42 From: Moher D, Liberati A, Tetzlaff J, Altman DG, The PRISMA Group (2009). Preferred Reporting Items for Systematic Reviews and Meta-Analyses: The PRISMA Statement. PLoS Med 6(7): e1000097.  
 43 doi:10.1371/journal.pmed1000097

44 For more information, visit: [www.prisma-statement.org](http://www.prisma-statement.org).

45 For peer review only - <http://bmjopen.bmj.com/site/about/guidelines.xhtml>

Page 2 of 2

46

47

# BMJ Open

## Experiences of living with long COVID and of accessing healthcare services: a qualitative systematic review

|                                 |                                                                                                                                                                                                                                                                                                                                                       |
|---------------------------------|-------------------------------------------------------------------------------------------------------------------------------------------------------------------------------------------------------------------------------------------------------------------------------------------------------------------------------------------------------|
| Journal:                        | <i>BMJ Open</i>                                                                                                                                                                                                                                                                                                                                       |
| Manuscript ID                   | bmjopen-2021-050979.R2                                                                                                                                                                                                                                                                                                                                |
| Article Type:                   | Original research                                                                                                                                                                                                                                                                                                                                     |
| Date Submitted by the Author:   | 18-Nov-2021                                                                                                                                                                                                                                                                                                                                           |
| Complete List of Authors:       | Macpherson, Karen; Healthcare Improvement Scotland Glasgow, Cooper, K; Robert Gordon University, School of Health Sciences Harbour, Jenny; Healthcare Improvement Scotland Glasgow Mahal, Dawn; Healthcare Improvement Scotland Glasgow Miller, Charis; Healthcare Improvement Scotland Glasgow Nairn, Moray; Healthcare Improvement Scotland Glasgow |
| <b>Primary Subject Heading</b>: | Qualitative research                                                                                                                                                                                                                                                                                                                                  |
| Secondary Subject Heading:      | Communication, Health services research, Health policy, Patient-centred medicine                                                                                                                                                                                                                                                                      |
| Keywords:                       | Organisation of health services < HEALTH SERVICES ADMINISTRATION & MANAGEMENT, Quality in health care < HEALTH SERVICES ADMINISTRATION & MANAGEMENT, INFECTIOUS DISEASES, QUALITATIVE RESEARCH, VIROLOGY                                                                                                                                              |
|                                 |                                                                                                                                                                                                                                                                                                                                                       |

SCHOLARONE™  
Manuscripts



I, the Submitting Author has the right to grant and does grant on behalf of all authors of the Work (as defined in the below author licence), an exclusive licence and/or a non-exclusive licence for contributions from authors who are: i) UK Crown employees; ii) where BMJ has agreed a CC-BY licence shall apply, and/or iii) in accordance with the terms applicable for US Federal Government officers or employees acting as part of their official duties; on a worldwide, perpetual, irrevocable, royalty-free basis to BMJ Publishing Group Ltd ("BMJ") its licensees and where the relevant Journal is co-owned by BMJ to the co-owners of the Journal, to publish the Work in this journal and any other BMJ products and to exploit all rights, as set out in our [licence](#).

The Submitting Author accepts and understands that any supply made under these terms is made by BMJ to the Submitting Author unless you are acting as an employee on behalf of your employer or a postgraduate student of an affiliated institution which is paying any applicable article publishing charge ("APC") for Open Access articles. Where the Submitting Author wishes to make the Work available on an Open Access basis (and intends to pay the relevant APC), the terms of reuse of such Open Access shall be governed by a Creative Commons licence – details of these licences and which [Creative Commons](#) licence will apply to this Work are set out in our licence referred to above.

Other than as permitted in any relevant BMJ Author's Self Archiving Policies, I confirm this Work has not been accepted for publication elsewhere, is not being considered for publication elsewhere and does not duplicate material already published. I confirm all authors consent to publication of this Work and authorise the granting of this licence.

# Experiences of living with long COVID and of accessing healthcare services: a qualitative systematic review

Corresponding author: Karen Macpherson, Delta House, 50 West Nile Street, Glasgow, G1 2NP. UK  
karen.macpherson3@nhs.scot

## Authors:

Professor Kay Cooper, School of Health Sciences, Robert Gordon University, Aberdeen, UK

Jenny Harbour, Healthcare Improvement Scotland, Glasgow UK

Dawn Mahal, Healthcare Improvement Scotland, Glasgow UK

Charis Miller, Healthcare Improvement Scotland, Glasgow UK

Moray Nairn, Healthcare Improvement Scotland, Glasgow UK

Word count: 5,020



## ABSTRACT

**Objective** To explore the experiences of people living with long COVID and how they perceive the healthcare services available to them.

**Design** Qualitative systematic review

**Data sources** Electronic literature searches of websites, bibliographic databases and discussion forums, including PubMed LitCovid, Proquest COVID, EPPI Centre living systematic map of evidence, medRxiv, bioRxiv, Medline, Psychinfo and Web of Science Core Collection were conducted to identify qualitative literature published in English up to 13 January 2021.

**Inclusion criteria** Papers reporting qualitative or mixed-methods studies that focussed on the experiences of long COVID and/or perceptions of accessing healthcare by people with long COVID. Title/abstract and full-text screening were conducted by two reviewers independently, with conflicts resolved by discussion or a third reviewer.

**Quality appraisal** Two reviewers independently appraised included studies using the qualitative CASP checklist. Conflicts were resolved by discussion or a third reviewer.

**Data extraction and synthesis** Thematic synthesis, involving line-by-line reading, generation of concepts, descriptive and analytical themes, was conducted by the review team with regular discussion.

**Results** Five studies published in 2020 met the inclusion criteria, two international surveys and three qualitative studies from the UK. Sample sizes varied from 24 (interview study) to 3,762 (survey). Participants were predominantly young white females recruited from social media or online support groups. Three analytical themes were generated: (i) symptoms and self-directed management of long COVID; (ii) emotional aspects of living with long COVID, and (iii) healthcare experiences associated with long COVID.

### Conclusions

People experience long COVID as a heterogeneous condition, with a variety of physical and emotional consequences. It appears that greater knowledge of long COVID is required by a number of stakeholders, and that the design of emerging long COVID services, or adaptation of existing services for long COVID patients should take account of patients' experiences in their design.

### Strengths and limitations of this study

- This review synthesizes the existing qualitative literature on people's experiences of long COVID and the healthcare services available to them
- The search strategy was comprehensive and sought to find published research, pre-publication articles and grey literature
- The search was limited to the English language, therefore potentially relevant studies may have been excluded

- Only five qualitative studies of variable quality were eligible for inclusion in this review, limiting the extent to which conclusions and practice recommendations can be made
- Participants in the included studies were predominantly younger, female, and users of social media or online support groups, which may also limit the generalisability of the review findings

## INTRODUCTION

The long-term effects of COVID-19 are recognised increasingly as being heterogeneous and complex in nature. At the start of the COVID-19 pandemic there was a widespread perception that COVID-19 was an acute infection that resulted in death or recovery after two weeks.<sup>1</sup> However, many people experienced wide-ranging and fluctuating symptoms for weeks or months after confirmed or suspected COVID-19 infection. As these experiences were shared, on social media and other outlets, the term ‘long COVID’ was generated by patients.<sup>2</sup> There remains no internationally agreed definition of long COVID, as COVID-19 is still a relatively new disease, with ongoing research on the long-term effects.<sup>3</sup> Greenhalgh *et al*<sup>4</sup> suggested “post-acute COVID-19” for symptoms lasting beyond 3 weeks after onset, and “chronic COVID-19” for those lasting beyond 12 weeks. Recent UK guidelines defined “ongoing symptomatic COVID-19” as signs and symptoms lasting 4-12 weeks and “post-COVID-19 syndrome” as signs and symptoms developing during or after COVID-19 and continuing beyond 12 weeks.<sup>5 6</sup> As this systematic review is concerned with lived experience, we will use the patient-generated term long COVID to encapsulate all these definitions.

Symptoms of long COVID can affect those hospitalised and ventilated,<sup>3</sup> as well as those with so-called mild COVID-19, during the acute phase.<sup>4</sup> Little is known about long-term sequelae in asymptomatic patients, with this recently highlighted as an important area for future research.<sup>3</sup> Potential long-term effects include central nervous system, psychosocial, cardiovascular, pulmonary, haematologic, renal and gastrointestinal symptoms, as well as widely reported persistent fatigue, dyspnoea, joint and chest pain.<sup>3</sup> Estimates of long COVID rates vary from 10%<sup>4</sup> to 35%<sup>7</sup> with the true rate yet to be determined. Therefore, with over 108,000,000 confirmed COVID-19 cases globally as of 30<sup>th</sup> January 2021,<sup>8</sup> there are now a large number of people at risk of long COVID.

Healthcare services specifically for long COVID are evolving. For example, some specialist centres have been set up in parts of the UK,<sup>9</sup> and there has been a global call for the development of rehabilitation programmes and services for long COVID patients.<sup>10</sup> In order for healthcare services to meet patients’ needs, it is important to understand the experience of long COVID and of accessing healthcare services from patients’ perspectives. There is a growing body of qualitative research on the lived experience of long COVID, and to date, no published synthesis of this literature. The aim of this qualitative systematic review was therefore to explore the experiences of people living with long COVID and their perceptions of the healthcare services available to them.

## METHODS

A qualitative systematic literature review was undertaken based on an *a priori* protocol (available on request) and reported in accordance with the Preferred Reporting Items for Systematic Reviews and Meta-Analyses (PRISMA) statement.<sup>11</sup> This review updates a review undertaken by the authors to inform the production of the Scottish Intercollegiate Guidelines Network (SIGN), National Institute of Health and Care Excellence (NICE) and Royal College of General Practitioners (RCGP) guideline on the management of long COVID.<sup>5</sup>

### Inclusion criteria

Full details of the inclusion criteria for the review are given in supplementary file 1.

Participants: Individuals experiencing long COVID whether suspected or confirmed by diagnostic test, with no restriction on duration of symptoms. We excluded studies on the views or experiences of healthcare for conditions other than COVID-19 and those relating to the views of healthcare staff, unless they were patients themselves.

Phenomena of interest: people's views on and experiences of living with and managing long COVID, and on the healthcare services available to them.

Context: studies from any country and any setting.

Types of study: systematic reviews of qualitative studies; primary qualitative studies; qualitative components of mixed method studies.

### Information sources and search strategy

An information specialist (CM) carried out a search in October 2020. Sources searched included: PubMed LitCovid, Proquest COVID, EPPI Centre living systematic map of evidence, medRxiv, bioRxiv, Medline, PsychInfo, and Web of Science Core Collection. A full list of resources searched is available in supplementary file 2. Published studies, grey literature and pre-publication articles were sought. In databases not specific to COVID-19, search results were limited to publications in 2020. All searches were limited to the English language due to a lack of translation services and the need for evidence to be synthesised in a timely manner due to the rapidly evolving nature of long COVID research. A search update was conducted on 13 January 2021.

Bibliographic database searches applied adapted versions of the qualitative research filter by DeJean *et al* (2016)<sup>12</sup> and a filter for patient experience literature developed by combining terms from papers by Selva *et al* (2017)<sup>13</sup> and Wessels *et al* (2016)<sup>14</sup>. The search strategy for Medline is available in supplementary file 2. Search strategies for other bibliographic databases are available on request.

## Study selection

Citations were uploaded to EndNote software and duplicates removed. Records were screened against the inclusion criteria based on titles and abstracts by two reviewers independently (JH, DM). The same two reviewers then assessed the full text of potentially relevant articles. Disagreements were discussed and referred to a third reviewer where necessary. The two reviewers were in agreement for the majority of the papers and only one study required recourse to the third reviewer. (KM).

## Data extraction

Two reviewers independently extracted descriptive data from each study (KC, JH, KM, DM, MN), using a data extraction template designed specifically for this review. The reviewers then compared templates and resolved any discrepancies, which were few in number, by discussion. Details extracted from the studies included: country in which the study was conducted, method of data collection and analysis, phenomena of interest, setting / context / culture, participant characteristics and sample size, and a description of the main results. As this review was conducted in a short timescale, to provide early evidence on a rapidly evolving subject, we did not contact authors for missing information.

## Quality appraisal

Included studies were critically appraised by two reviewers independently (KC, JH, KM, DM, MN, JH) using the CASP qualitative checklist (<https://casp-uk.net/casp-tools-checklists/>). Discrepancies, which were minimal, were discussed and referred to a third reviewer if required. For the reasons described above, authors were not contacted for additional information on methodology of their individual studies.

## Data synthesis

Thematic synthesis was undertaken on the findings from included studies.<sup>15</sup> This involved: (i) line-by-line reading of each study by two reviewers independently (JH, KM, MN) to identify initial concepts; (ii) grouping similar concepts into initial descriptive themes and sub-themes, and (iii) generating the final analytical themes. These were discussed and agreed by the review team (KC, JH, KM, DM, MN) throughout the process, and any disagreements resolved by discussion within the team.

## Patient and public involvement

As a systematic review focussed on published and grey literature no primary research involving patients was conducted. The original synthesis that this review updates, was subject to review by an expert group that included several members with lived experience of long COVID, and a targeted public consultation which included groups representing those with experience of this condition. Further details are provided within the NICE long COVID guideline.<sup>5</sup>

## RESULTS

## Search results

The literature search identified 269 articles. A further two studies were identified from reference lists. After removal of duplicates and title/abstract screening, seven articles were evaluated as full-text. The main reasons for excluding articles were no qualitative element to the research, no patient involvement and not meeting our definition of long COVID (we were interested in studies relating to symptoms over four weeks duration). Out of the seven fully evaluated articles, one study was excluded because it did not use qualitative methods or contain data on direct patient experience. A second study which was initially included was later excluded after it was withdrawn from pre-publication by the authors. A PRISMA flow diagram depicting the study selection process is provided in figure 1.

## Characteristics of included studies

Five studies were included in the thematic synthesis (table 1).<sup>1 16-19</sup> Three studies conducted focus groups or interviews with patients from the UK and two studies, from the Patient Led Research group, conducted international surveys with most responses coming from the USA and the UK. Sample sizes varied from 24 interviews to 3,762 survey respondents, and were generally weighted towards white (83.8%), female participants (75%). The number of patients included in the studies in which information was gathered through surveys was much larger than those using interviews and focus groups as data collection methods. However, while representing fewer patients, the latter method offers the opportunity of collecting more in depth data and for interaction among participants and/or with the interviewer. All studies focussed on adults with an age range of 20-68 years in the four studies that reported participants' ages; one study did not report the number of participants or their ages.<sup>1</sup>

## Methodological quality

Studies were of variable methodological quality. Three met most of the criteria on the CASP checklist (table 2) and thus were considered of high quality, and two met fewer criteria. No studies were excluded on the basis of quality as all were considered to offer valuable content despite the limitations identified.

All five studies recruited participants through social media and/or online support groups. While this is understandable given the need to quickly access participants for whom no established groups or organisations existed, this convenience sampling may have resulted in bias.<sup>20</sup> People who are active on social media or online support groups are likely to differ from the general population (for example, younger age) and may be more vocal about their experiences. Three included studies acknowledged skewed sample characteristics including mainly white ethnicity, over-representation of women, and a generally younger age group.<sup>16 18 19</sup> Limited demographic information was provided on participants, particularly in Maxwell (2020),<sup>1</sup> making it difficult to determine which population groups may have been missed by these studies.

1  
2  
3  
4  
5  
6  
7  
8  
9  
10  
11  
12  
13  
None of the studies discussed potential biases arising from the relationship between researchers and study participants. This is despite people with lived experience of long COVID symptoms being among the study authors, or performing data analysis in some studies.<sup>16 17 19</sup> This participatory research approach can be considered to represent both a strength and a weakness. Having authors and researchers with experience of long COVID analyse data is beneficial in bringing lived experience to the interpretation of data. However, it may also introduce bias for the same reason.

14  
15  
16  
17  
18  
19  
20  
21  
22  
23  
24  
Several other quality issues were noted. In the study by Kingstone *et al*<sup>17</sup>, participants received a compensation voucher for their time, which may have influenced decisions on whether to participate. Ladds *et al*<sup>18</sup> only fully transcribed the first 10 out of the 55 interviews (the remaining interviews were partially transcribed). This was due to the urgency of the work and limited resources plus a perceived lack of need to duplicate previously discovered themes. This may have introduced bias. Finally, Maxwell<sup>1</sup> reported very limited methodological details, making it difficult to determine how the research was conducted or the number of people involved in the focus group.

### 25 26 27 28 29 30 31 32 33 34 35 36 37 38 **Review findings**

The initial stages of thematic analysis resulted in the generation of 138 descriptive themes. These were then refined into 54 sub-themes, which were attributed to 11 higher order themes using an iterative process, with continuous discussion between reviewers. Further review and refinement of themes resulted in three overarching analytical themes: (i) symptoms and self-directed management of long COVID; (ii) emotional aspects of living with long COVID; and (iii) healthcare experiences associated with long COVID. Figure 2 shows the relationship between the final three themes and the initial 11 higher order themes. Full details of descriptive themes and sub-themes are available in supplementary file 3.

### 39 40 41 42 43 44 45 46 47 48 49 50 51 52 53 54 55 56 57 58 59 60 **Symptoms and self-directed management of long COVID**

Evidence from all the included studies<sup>1 16-19</sup> showed that people with long COVID experience a wider range of symptoms than the three symptoms officially recognised as acute COVID-19: high temperature, new continuous cough, and change or loss of sense of smell or taste. One individual stated:

*“From week four I started to get chest pains and then breathlessness, gradually other symptoms developed including dry mouth, sore tongue, joint pains, fatigue, rash and tachycardia.”<sup>1</sup>*

The symptoms experienced by patients with long COVID varied in severity from relatively mild to potentially life-threatening symptoms that required hospital admission<sup>16-19</sup>. Symptoms also fluctuated over time with new symptoms appearing at different stages of the illness and in different parts of the body<sup>1,17-19</sup>. Each symptom was experienced for a prolonged but variable length of time, with a cumulative effect in many cases<sup>1,16,18</sup>.

1  
2  
3 People identified a disconnect between their lived experiences, official advice, and public  
4 perception of the illness. It was felt that the public perceived the illness as a binary  
5 condition<sup>1,17</sup> – either mild and easily treated at home or serious and requiring  
6 hospitalisation – with no variation or allowances made for ongoing symptoms.  
7  
8

9 *“So, COVID-19, it’s either a mild infection or you die? No. But no one is prepared to think*  
10 *about us.”<sup>17</sup>*  
11

12  
13 The literature showed that people believed they would require a short recovery period and  
14 would be back at work in two weeks, a belief mirrored by employers and the public <sup>1,16-19</sup>.  
15 The lived experience, for some, was quite different:  
16

17  
18 *“After nearly 6 months I have started to feel some improvement, although doing anything*  
19 *remotely physical results in a flare up of symptoms...”<sup>1</sup>*  
20

21  
22 *“I had to take two weeks off, had to work from home for four, but had to return for two*  
23 *weeks with fever as my employer would not give me more time [...].”<sup>16</sup>*  
24

25 This discordance between expectations and experience seemed to have a direct effect on  
26 the mental and emotional state of those experiencing prolonged illness<sup>1,18,19</sup>, often leading  
27 to uncertainty about what to do about their symptoms <sup>1,17,18</sup>. People described needing to  
28 adjust their lifestyle, including pacing themselves and setting realistic goals, in order to self-  
29 manage their symptoms <sup>1,17,18</sup>. One study highlighted specific methods used by a number of  
30 patients attempting to self-care, such as taking supplements or trying therapeutic  
31 massage<sup>17</sup>.  
32  
33

34  
35 Many people turned to social media and support groups (online or face-to-face) for support  
36 and found them to be a valuable way to share experiences, knowledge and resources with  
37 others in a similar situation<sup>17,18,19</sup>. This communication helped to validate patient  
38 experiences and provided reassurance they were not alone in their struggle with long-term  
39 symptoms.  
40

41  
42 *“At least I know I’m not alone. And I think people who actually have had the disease tend to*  
43 *know a little bit more about it... I actually think that the support group has given more*  
44 *knowledge than the doctors have.”<sup>18</sup>*  
45

46  
47 However, there were also reports of stigma, anxiety and depression<sup>17,19</sup> triggered by  
48 knowledge garnered from these online groups.  
49

50  
51 *“...Internet support groups, yeah on the Facebook groups that I’m on, I mean to be honest, I*  
52 *try not to read that group too much because it depresses me, makes me a bit anxious.”<sup>17</sup>*  
53

#### 54 **Emotional aspects of living with long COVID**

55

56  
57 For many patients there was a feeling that their self-identity was affected by long COVID.  
58 People reported an impact on how they viewed themselves, before and after their illness <sup>16,</sup>  
59 <sup>18</sup>. There was a feeling they had to reconsider who they were and what they could do within  
60

1  
2  
3 the context of family and work<sup>16-18</sup>. The phrase “compared with how I used to be” was used  
4 by multiple participants in Kingstone et al’s (2020) study,<sup>17</sup> whilst Ladds et al (2020)<sup>18</sup>  
5 commented on the concept of a “spoiled identity” where an identity as previously “healthy,  
6 independent and successful” was perceived to be threatened.  
7  
8

9 Interviews by Ladds et al<sup>18</sup> with doctors and other clinicians who had experienced long  
10 COVID showed that many were worried about the impact of cognitive deficits on their  
11 ability to perform their jobs.  
12

13  
14 *“[T]he medicolegal aspect is huge .... and it’s scary to not be able to recognise potentially*  
15 *where you have deficits because if you can’t recognise them then that’s an unknown*  
16 *unknown in what can you do with that.”<sup>18</sup>*  
17

18  
19 There was a sense of stigma associated with long COVID, with people experiencing a sense  
20 of shame and blame (internally generated stigma) and expressing fears that employers and  
21 others in the community may stigmatise them for having long COVID (externally generated  
22 stigma)<sup>1,18,19</sup>. Family members were considered to be affected by long COVID and were seen  
23 as also requiring support<sup>1,17</sup>. One interview participant described the impact her symptoms  
24 had on her family and how she felt they did not believe her:  
25  
26

27  
28 *“I think, at first, they just thought, ‘Oh, for god’s sake, she’s napping again’. I feel like I*  
29 *constantly have to explain. I’m just exhausted and I just want to know why I’m so exhausted*  
30 *....”<sup>17</sup>*  
31

32 Patients described experiencing a range of emotions as part of their illness journey<sup>1,16-18</sup>.  
33 Anxiety was often related to multiple aspects of the illness including uncertainty about the  
34 cause of symptoms, concern that they may never recover completely, and anxiety due to  
35 not being believed by healthcare professionals, family and friends.  
36  
37

38  
39 *“.... I was really frightened, terrified and just thought I might die on a couple of occasions ...*  
40 *maybe not “I’m going to die right now”, but definitely “I’m never going to get better from*  
41 *this” kind of feeling.”<sup>17</sup>*  
42

43 Patients also expressed a strong desire to find acceptance and understanding about their  
44 experiences of long COVID, both among healthcare professionals and family and friends.  
45  
46

47  
48 *“... one of my friends did say after quite a while, “I’m not being awful, but do you think a lot*  
49 *of it’s in his mind?” and I said “no”. I was quite upset about that...”<sup>17</sup>*  
50

51 Similarly, there was a widespread perception that healthcare professionals doubted  
52 patients’ descriptions of long COVID<sup>1</sup>, ignored patient concerns<sup>17</sup>, misdiagnosed  
53 symptoms<sup>19</sup>, or were dismissive of patient experiences<sup>19</sup>. This lack of knowledge affected  
54 people’s feelings around their healthcare experiences<sup>17</sup>.  
55  
56

## 57 Healthcare experiences

58  
59  
60



1  
2  
3 Across most of the studies, participants expressed concerns relating to the lack of  
4 knowledge, information and understanding about long COVID among healthcare  
5 professionals<sup>1,17-19</sup>. While the reason behind this lack of knowledge was understood, there  
6 was a general feeling that there needed to be acknowledgement of this gap within the  
7 healthcare community.  
8  
9

10 *“Well yeah, I feel like there’s a lack of knowledge. And I really wasn’t able to get any*  
11 *answers, I know, you know this is obviously a novel illness. But just even for one doctor to*  
12 *look into it a bit and come back to me, didn’t happen.”<sup>17</sup>*  
13  
14

15 The absence of knowledge and information about long COVID symptoms was reported to  
16 create anxiety and confusion for patients<sup>1,17-19</sup>. Ladds *et al* (2020)<sup>18</sup> found that this confusion  
17 was intensified by the lack of medical knowledge, understanding and guidance from  
18 healthcare professionals. There were also reports of conflicting or inconsistent advice from  
19 health professionals.<sup>18</sup>  
20  
21

22 Some professionals did recognise the limitations of their own knowledge<sup>17, 18</sup> and referred  
23 patients to online support groups. Focus group participants suggested they would rather be  
24 told that the professional did not have the knowledge required to address their illness, if  
25 that was the case<sup>17</sup>. The importance of finding a General Practitioner (GP) who was  
26 understanding, empathetic and who provided support to those experiencing long COVID is  
27 highlighted in this quote:  
28  
29

30 *“I have to say it was a really powerful experience speaking to the GPs ... the two more recent*  
31 *ones, actually just the experience of being heard and feeling like somebody got it and was*  
32 *being kind about it, but you know it was okay that they couldn’t do anything, I just kind of*  
33 *needed to know that I wasn’t losing it really and it was real what I was experiencing, I think*  
34 *so that was really helpful.”<sup>17</sup>*  
35  
36  
37

38 Along with this perceived lack of knowledge, multiple perceived barriers to healthcare  
39 access were reported<sup>1,17,18</sup>, along with a perception among participants that health services  
40 and doctors were too busy dealing with cases of acute COVID-19 to have capacity to deal  
41 with anything else, including patients with long-term symptoms<sup>1,18</sup>. This perception  
42 appeared strengthened by the difficulties people experienced when trying to access primary  
43 care, especially if they were seeking a face-to-face consultation.  
44  
45

46 *“I think the message to avoid hospital and the GP unless you had specific symptoms was very*  
47 *unhelpful, particularly as I didn’t have, and never have had, a cough or fever”<sup>1</sup>*  
48  
49

50 In general, study participants found accessing care to be “complex, difficult and  
51 exhausting”.<sup>18</sup> This led to patients describing how they felt they had to manipulate the  
52 inflexible algorithm-driven systems in order to receive care, which led to feelings of guilt and  
53 anger<sup>18</sup>. Some patients described creative solutions they had come up with to help them  
54 access healthcare, while others reported resorting to private healthcare to access tests<sup>18</sup>.  
55 Many patients felt they needed to conduct their own research and construct their own care  
56 pathways, taking the lead in arranging consultations with specialists and circumventing  
57  
58  
59  
60

1  
2  
3  
4  
5  
6  
7  
8  
9  
10  
11  
12  
13  
14  
15  
16  
17  
18  
19  
20  
21  
22  
23  
24  
25  
26  
27  
28  
29  
30  
31  
32  
33  
34  
35  
36  
37  
38  
39  
40  
41  
42  
43  
44  
45  
46  
47  
48  
49  
50  
51  
52  
53  
54  
55  
56  
57  
58  
59  
60

bottlenecks in the system<sup>18</sup>. This was reported as a route often employed by medical professionals who themselves were suffering from long COVID<sup>18</sup>.

There was also a perceived lack of support within the system<sup>1,17,18</sup>. Some individuals described how NHS111 (a national telehealth helpline in the UK) had directed them to their GP who then directed them back to NHS111.<sup>18</sup> There was what appeared to be a lack of guidance for those who did not need to be admitted to hospital but were no longer in the acute phase of the illness<sup>1,18,19</sup>.

Patients who felt they had received satisfactory care and access to healthcare were generally those who had been offered follow-up appointments and who felt their healthcare providers listened to them and gave them ongoing support, even if that was in the form of a video or telephone call<sup>17-19</sup>.

Telemedicine was widely used to facilitate interactions with healthcare services<sup>1,17-19</sup>. However, it was generally perceived by patients to have limitations<sup>1,17</sup>. Remote consulting with primary care was viewed by some patients as potentially limiting direct access to GPs, disrupting continuity of care (people often could not see the same GP every time), and making the communication of symptoms more challenging<sup>1,17,18</sup>. Some patients felt that strict adherence to protocols for telemedicine-delivered care affected patient safety or led to mismanagement of their care.

*"... I remembered ringing my GP from the floor on my lounge laying on my front and kind of saying I'm really short of breath, you know, do you think I should try an inhaler do I need to go back to A&E and I was kind of told well you don't really sound too out of breath over the phone .... I really felt at that point right if you could see me you would see that I am really like broken"*<sup>18</sup>

A positive view expressed in relation to telemedicine was that it increased accessibility of primary care during periods of societal restrictions aimed at controlling the spread of COVID-19.

*"My doctor was available via messaging, telephone, and telemedicine. She also contracted COVID-19 so she shared her experience with recovery and it helped me stay calm that I was on the right track."*<sup>19</sup>

When asked to describe desirable features of healthcare services or service delivery for patients with long COVID<sub>2</sub>, research participants asked for face-to-face assessments<sup>1,17</sup> and talked about the need for 'one-stop clinics' with multidisciplinary teams (MDT) who could look at their wide-ranging symptoms and treat them holistically<sup>1,17,18</sup>. A case manager to oversee individual patients and ensure that all aspects of their care was considered was suggested, along with meaningful referral pathways and criteria<sup>1</sup>.

*"What would be most helpful is if all main hospitals could have a COVID clinic that had experts from respiratory, cardiology, rheumatology, neurology, physiotherapy etc, so you could go along for half a day and see people from these different departments, they can*

1  
2  
3 *refer you for tests and you can get a plan in place, we are having such a range of symptoms*  
4 *that GPs are struggling to know what to do with you”<sup>1</sup>*  
5  
6

7 Other participants spoke about wanting to be listened to, to be believed and understood,  
8 and to be offered practical advice on coping<sup>1</sup>.  
9

## 10 **DISCUSSION**

11  
12  
13 To our knowledge, this is the first synthesis of findings from qualitative studies on peoples’  
14 experiences of living with long COVID and accessing healthcare services for this condition.  
15 Our main findings were threefold. Firstly, that the lived experience of long COVID is highly  
16 variable and perceived as being at odds with public perceptions and official guidance on  
17 COVID-19. Secondly, that there are significant emotional consequences of living with long  
18 COVID that need to be understood by a number of stakeholders. Finally, that people with  
19 long COVID report a range of positive and negative healthcare experiences that can be used  
20 to inform the development of new, or adaptation of existing, services for this important  
21 patient group.  
22  
23

24  
25 COVID-19 is a new illness, first declared a public health emergency by the World Health  
26 Organisation on 30<sup>th</sup> January 2020.<sup>21</sup> The implications across the globe and stress on  
27 healthcare services are unprecedented. It is perhaps unsurprising that knowledge of long  
28 COVID is perceived as underdeveloped; there is no agreed definition of long COVID and the  
29 long-term sequelae are to a large extent unknown.<sup>3</sup> Many people in the included studies  
30 turned to social media and patient-led support groups, due to perceived lack of  
31 understanding from family, employers and healthcare professionals.<sup>1,17-19</sup> Social media and  
32 support groups are widely used for other health conditions,<sup>22</sup> but are generally considered  
33 complementary to healthcare services; part of the “jigsaw” that makes supported self-  
34 management successful.<sup>23</sup> Therefore, there appears to be a need for more widespread  
35 understanding of and information about long COVID, and people with lived experience are  
36 ideally placed to contribute their expert opinion.  
37  
38  
39

40  
41 Our review highlighted a number of emotional consequences of long COVID including the  
42 impact on people’s identities, employment, and relationships with family and healthcare  
43 providers. Emerging models and recommendations for managing long COVID all highlight  
44 the need for psychological inputs.<sup>24-26</sup> It is perhaps more complex to address the wider  
45 emotional consequences highlighted by this review; however, understanding and  
46 information as described above and targeted at various levels (e.g. healthcare professionals,  
47 patients, public, employers) appears to be indicated.  
48  
49

50  
51 In addition to lack of knowledge, the review found a number of barriers to accessing  
52 healthcare, with reports of unhelpful messaging and complex processes to navigate.  
53 Healthcare professionals with long COVID were more able to navigate this complex system  
54 than non-professionals, suggesting a potential inequality. Telemedicine, rapidly rolled-out in  
55 many countries as a way of maintaining healthcare during the pandemic,<sup>27</sup> was not always  
56 seen as beneficial. As new models for managing long COVID emerge, these findings may be  
57 useful for ensuring that services are patient-centred.<sup>28</sup> The finding that patients want  
58  
59  
60

1  
2  
3 multidisciplinary, holistic services is congruent with the well-documented multi-organ  
4 nature of COVID-19, and heterogeneous nature of long COVID symptoms.<sup>3</sup>  
5  
6

### 7 **Strengths and limitations**

8  
9 Our review has highlighted a range of important issues associated with long COVID and  
10 accessing healthcare, from the perspective of people with this condition. The review is  
11 limited by the small number of qualitative studies (n=5) that have been published to date,  
12 and will benefit from being updated as further research becomes available in this fast-  
13 moving field. Nonetheless, it contributes to an early understanding of the lived experience  
14 of long COVID and of accessing healthcare services. The majority of studies were conducted  
15 in the UK, there was over-representation of younger and female, white, participants, and all  
16 studies recruited participants via social media or online support groups. Therefore, the  
17 findings apply to this population, and it is possible that other groups of people with long  
18 COVID have different experiences and views. Some emerging evidence suggests that long  
19 COVID may be more prevalent in younger female individuals<sup>29</sup>; a meta-analysis in pre-print  
20 form however reports a linear increase in long COVID from age 20-70<sup>30</sup>. We limited our  
21 search to studies published in English; therefore it is possible that we missed studies  
22 published in other languages. We did not exclude studies on methodological quality,  
23 resulting in the inclusion of one study with limited methodological details resulting in a low  
24 CASP score. However, the validity of appraisal of qualitative research is debated in the  
25 literature,<sup>31</sup> and we are confident that all studies contributed valuable data on the lived  
26 experience of long COVID. We did not formally calculate agreement between pairs of reviewers at  
27 data extraction, critical appraisal or data synthesis stages. However, given the small number of  
28 included studies, and frequent communication within the review team, there were very few  
29 instances of disagreement, all of which were resolved by discussion. We did not contact authors  
30 for additional information that may have allowed us to more fully appraise methodological  
31 quality of the included studies. However, because we did not exclude any studies based on  
32 methodological quality; therefore, the review findings were not affected.  
33  
34  
35  
36  
37  
38  
39

### 40 **Implications for practice**

41  
42 There is a need for greater understanding and communication about long COVID at a  
43 number of levels (public, policy and healthcare professional). Our findings suggest that  
44 people with long COVID are well placed to co-create this understanding and communication.  
45 Our findings can also be used by those currently developing services for people with long  
46 COVID, to ensure that they meet patients' needs. The varied and fluctuating symptoms and  
47 emotional consequences experienced by people with long COVID indicate a need for multi-  
48 disciplinary services, which provide holistic patient-centred assessment, appropriate  
49 management and specialist referral where indicated.  
50  
51  
52

### 53 **Implications for research**

54  
55 Further qualitative research on more culturally diverse samples of people with long COVID is  
56 indicated to help understand the impact of long COVID and the healthcare needs of the  
57 wider population than is represented by the current review. As models of care and services  
58  
59  
60

1  
2  
3 are developed/adapted for people with long COVID, it is vital that the views and experiences  
4 of people with long COVID continue to be explored.  
5

## 6 7 **CONCLUSION**

8  
9 We have presented a synthesis of the current qualitative evidence on the experience of  
10 living with long COVID and of accessing healthcare services. People experience long COVID  
11 as a heterogeneous condition, with a variety of physical and emotional consequences. It  
12 appears that greater knowledge of long COVID is required by a number of stakeholders, and  
13 that the design of emerging long COVID services, or adaptation of existing services for long  
14 COVID patients should take account of patients' experiences in their design.  
15  
16

## 17 **Funding statement**

18  
19 This research received no specific grant from any funding agency in the public, commercial  
20 or not-for-profit sectors.  
21  
22

## 23 **Contributors**

24  
25 DM, JH, KC, KM and MN developed the protocol. CM conducted the literature searches. JH  
26 and DM screened articles for inclusion. KM, DM, JH and MN extracted data, appraised  
27 studies, and, including KC, were involved with synthesising the qualitative data, interpreting  
28 the findings and writing the first draft of the manuscript. Other members of the research  
29 teams within Robert Gordon University, Aberdeen, and Healthcare Improvement Scotland  
30 provided peer review comments on the draft manuscript.  
31  
32

## 33 **Competing interests**

34  
35 None declared.  
36  
37

## 38 **Data sharing statement**

39  
40 Search strategies for databases other than Medline are available by contacting the  
41 corresponding author. Full data extraction tables are also available.  
42  
43

## 44 **Ethics approval statement**

45  
46 Ethics approval was not sought as this study was a systematic review of published evidence.  
47  
48

## 49 **REFERENCES**

- 50  
51  
52  
53  
54  
55 1. Maxwell D. Living with COVID19: a dynamic review of the evidence around ongoing Covid19  
56 symptoms (often called Long Covid) 2020 [2020 Nov 02]. Available from:  
57 <https://evidence.nihr.ac.uk/themedreview/living-with-covid19/>.  
58  
59 2. Callard F, Perego E. How and why patients made Long Covid. *Soc Sci Med* 2021;268:113426.  
60

- 1
- 2
- 3 3. Higgins V, Sohaei D, Diamandis EP, et al. COVID-19: from an acute to chronic illness? Potential  
4 long-term health consequences. *Crit Rev Clin Lab Sci* 2020 [published Online First: 21 Dec  
5 2020]
- 6 4. Greenhalgh T, Knight M, A'Court C, et al. Management of post-acute covid-19 in primary care. *BMJ*  
7 2020;370:m3026.
- 8 5. National Institute for Health and Care Excellence (NICE). COVID-19 rapid guideline: managing the  
9 long-term effects of COVID-19 2020 [2 Feb 2021]. Available from:  
10 <https://www.nice.org.uk/guidance/ng188>.
- 11 6. Scottish Intercollegiate Guidelines Network (SIGN). Managing the long-term effects of COVID-19  
12 2020 [2 Feb 2021]. Available from: [https://www.sign.ac.uk/our-guidelines/managing-the-](https://www.sign.ac.uk/our-guidelines/managing-the-long-term-effects-of-covid-19/)  
13 [long-term-effects-of-covid-19/](https://www.sign.ac.uk/our-guidelines/managing-the-long-term-effects-of-covid-19/).
- 14 7. Centers for Disease Control and Prevention (USA). Morbidity and mortality weekly report:  
15 symptom duration and risk factors for delayed return to usual health among outpatients  
16 with COVID-19 in a multistate health care systems network — United States, March–June  
17 2020 2020 [2 Feb 2021]. Available from:  
18 <https://www.cdc.gov/mmwr/volumes/69/wr/mm6930e1.htm>.
- 19 8. World Health Organization (WHO). Coronavirus disease (COVID-19) pandemic 2021 [2 Feb 2021].  
20 Available from: <https://www.who.int/emergencies/diseases/novel-coronavirus-2019>.
- 21 9. NHS England. NHS to offer 'long covid' sufferers help at specialist centres 2020 [2 Feb 2020].  
22 Available from: <https://www.england.nhs.uk/2020/10/nhs-to-offer-long-covid-help/>.
- 23 10. Gutenbrunner C, Stokes EK, Dreinhofer K, et al. Why rehabilitation must have priority during and  
24 after the COVID-19-pandemic: a position statement of the Global Rehabilitation Alliance. *J*  
25 *Rehabil Med* 2020;52(7):jrm00081.
- 26 11. Moher D, Liberati A, Tetzlaff J, et al. Preferred reporting items for systematic reviews and meta-  
27 analyses: the PRISMA statement. *BMJ* 2009;339:b2535. doi: 10.1136/bmj.b2535 [published  
28 Online First: 2009/07/23]
- 29 12. DeJean D, Giacomini M, Simeonov D, et al. Finding Qualitative Research Evidence for Health  
30 Technology Assessment. *Qual Health Res* 2016;26(10):1307-17. doi:  
31 10.1177/1049732316644429 [published Online First: 2016/04/28]
- 32 13. Selva A, Sola I, Zhang Y, et al. Development and use of a content search strategy for retrieving  
33 studies on patients' views and preferences. *Health Qual Life Outcomes* 2017;15(1):126. doi:  
34 10.1186/s12955-017-0698-5 [published Online First: 2017/08/31]
- 35 14. Wessels M, Hielkema L, van der Weijden T. How to identify existing literature on patients'  
36 knowledge, views, and values: the development of a validated search filter. *J Med Libr Assoc*  
37 2016;104(4):320-24. doi: 10.3163/1536-5050.104.4.014 [published Online First: 2016/11/09]
- 38 15. Thomas J, Harden A. Methods for the thematic synthesis of qualitative research in systematic  
39 reviews. *BMC Med Res Methodol* 2008;8:45. doi: 10.1186/1471-2288-8-45 [published Online  
40 First: 2008/07/12]
- 41 16. Davis HE, Assaf GS, McCorkell L, et al. Characterizing long COVID in an international cohort: 7  
42 months of symptoms and their impact. 2021
- 43 17. Kingstone T, Taylor AK, O'Donnell CA, et al. Finding the 'right' GP: a qualitative study of the  
44 experiences of people with long-COVID. *BJGP open* 2020;13:13. doi:  
45 <https://dx.doi.org/10.3399/bjgpopen20X101143>
- 46 18. Ladds E, Rushforth A, Wieringa S, et al. Persistent symptoms after Covid-19: qualitative study of  
47 114 "long Covid" patients and draft quality principles for services. *BMC health services*  
48 *research* 2020;20(1):1144. doi: <https://dx.doi.org/10.1186/s12913-020-06001-y>
- 49 19. Patient Led Research. Report: What Does COVID-19 Recovery Actually Look Like? An Analysis of  
50 the Prolonged COVID-19 Symptoms Survey by Patient-Led Research Team 2020 [2020 Oct 27  
51 ]. Available from: <https://patientresearchcovid19.com/research/report-1/>.
- 52
- 53
- 54
- 55
- 56
- 57
- 58
- 59
- 60

- 1
  - 2
  - 3
  - 4
  - 5
  - 6
  - 7
  - 8
  - 9
  - 10
  - 11
  - 12
  - 13
  - 14
  - 15
  - 16
  - 17
  - 18
  - 19
  - 20
  - 21
  - 22
  - 23
  - 24
  - 25
  - 26
  - 27
  - 28
  - 29
  - 30
  - 31
  - 32
  - 33
  - 34
  - 35
  - 36
  - 37
  - 38
  - 39
  - 40
  - 41
  - 42
  - 43
  - 44
  - 45
  - 46
  - 47
  - 48
  - 49
  - 50
  - 51
  - 52
  - 53
  - 54
  - 55
  - 56
  - 57
  - 58
  - 59
  - 60
20. Blank G, Lutz C. Representativeness of Social Media in Great Britain: Investigating Facebook, LinkedIn, Twitter, Pinterest, Google+, and Instagram. *American Behavioural Scientist* 2017;61(7) doi: <https://doi.org/10.1177/0002764217717559>
21. World Health Organization (WHO). COVID-19 public health emergency of international concern: global research and innovation forum - towards a research roadmap 2020 [16 Feb 2021]. Available from: [https://www.who.int/publications/m/item/covid-19-public-health-emergency-of-international-concern-\(pheic\)-global-research-and-innovation-forum](https://www.who.int/publications/m/item/covid-19-public-health-emergency-of-international-concern-(pheic)-global-research-and-innovation-forum).
22. Myneni S LB, Singh T, Paiva K, Kim SM, Cebula AV, Villanueva G, Wang J. Diabetes self-management in the age of social media: large-scale analysis of peer interactions using semiautomated methods. *JMIR Med Inform* 2020;8(6):e18441.
23. Anderson N OG. "It all needs to be a full jigsaw, not just bits": exploration of healthcare professionals' beliefs towards supported self-management for long-term conditions. *BMC Psychol* 2019;7(1):38.
24. Ladds E RA, Wieringa S, Taylor S, Rayner C, Husain L, Greenhalgh T. Developing services for long COVID: lessons from a study of wounded healers. *Clin Med J* 2021 [published Online First: Jan 2021]
25. Barker-Davies RM OSO, Senaratne KPP, Baker P, Cranley M, Dharm-Datta S, Ellis H, Goodall D, Gough M, Lewis S, Norman J, Papadopoulou T, Roscoe D, Sherwood D, Turner P, Walker T, Mistlin A, Phillip R, Nicol AM, Bennett AN, Bahadur S. The Stanford Hall consensus statement for post-COVID-19 rehabilitation. *Br J Sports Med* 2020;54(16):949-59.
26. Sivan M HS, Hollingworth L, Snook N, Hickman K, Clifton IJ. Development of an integrated rehabilitation pathway for individuals recovering from COVID-19 in the community. *J Rehabil Med* 2020;52(8):jrm00089.
27. Thomas EE HH, Mehrotra A, Snoswell L, Banbury A, Smith AC. Building on the momentum: sustaining telehealth beyond COVID-19. *J Telemed Telecare* 2020 [published Online First: 26 Sept 2020]
28. Moore L BN, Lydahl D, Naldemirci O, Elam M, Wolf A. Barriers and facilitators to the implementation of person-centred care in different healthcare contexts. *Scand J Caring Sci* 2017;31(4):662-73.
29. NIHR. Living with Covid19 – Second review 2021 [2021 Jul 08 ]. Available from: <https://evidence.nihr.ac.uk/themedreview/living-with-covid19-second-review/>.
30. Thompson EJ, Williams DM, Walker AJ, et al. Risk factors for long COVID: analyses of 10 longitudinal studies and electronic health records in the UK [Preprint]. *medRxiv* 2021 doi: <https://doi.org/10.1101/2021.06.24.21259277>
31. Majid U VM. Appraising qualitative research for evidence syntheses: a compendium of quality appraisal tools. *Qual Health Res* 2018;28(13):2115-31.

## FIGURES AND TABLES

### Figure legends

Figure 1 PRISMA flow diagram of study selection

Figure 2 Map of analytical and descriptive themes from the analysis

For peer review only



1  
2  
3  
4  
5  
6  
7  
8  
9  
10  
11  
12  
13  
14  
15  
16  
17  
18  
19  
20  
21  
22  
23  
24  
25  
26  
27  
28  
29  
30  
31  
32  
33  
34  
35  
36  
37  
38  
39  
40  
41  
42  
43  
44  
45  
46

For peer review only

**Table 1 Characteristics of included studies**

| Study [country]                                             | Study methods and setting                                                                                                                              | Participant characteristics and sample size                                                                                          | Main results                                                                                                                                                                                                                                                                                                                        |
|-------------------------------------------------------------|--------------------------------------------------------------------------------------------------------------------------------------------------------|--------------------------------------------------------------------------------------------------------------------------------------|-------------------------------------------------------------------------------------------------------------------------------------------------------------------------------------------------------------------------------------------------------------------------------------------------------------------------------------|
| Assaf <i>et al.</i> (2020) <sup>19</sup><br>[Multinational] | Online survey 21 Apr - 2 May 2020 circulated to long COVID support groups and through social media<br><br>Quantitative and qualitative data collection | n=640<br><br>Patients with symptoms lasting >2 weeks<br><br>62.7% aged 30-49; 76.0% white; 76.6% female                              | Cyclical symptoms experienced unexpectedly for ≥6 weeks<br><br>Stigma experienced by patients with long COVID<br><br>Impacts on lifestyle, including physical activity<br><br>Dismissed or misdiagnosed by medical professionals<br><br>Sentiment analysis conducted on satisfaction with medical staff and on sharing experiences. |
| Davis <i>et al.</i> (2020) <sup>16</sup><br>[Multinational] | Online survey 6 Sept – 25 Nov 2020 circulated to online patients support groups and social media<br><br>Quantitative and qualitative data collection   | n=3,762<br><br>Patients with symptoms lasting >28 days<br><br>60.8% aged 40-59; 85.3% white; 78.9% female                            | Patients with long COVID reported prolonged multisystem involvement and significant disability.<br><br>The most frequent symptoms reported after 6 months were:<br><br>fatigue<br><br>post-exertional malaise<br><br>cognitive dysfunction.                                                                                         |
| Kingstone <i>et al.</i> (2020) <sup>17</sup><br>[UK]        | Recruitment through social media (Twitter or Facebook) and snowball sampling Jul - Aug 2020<br><br>Semi-structured interviews by telephone or video    | n=24<br><br>Self-reported persistent symptoms following acute COVID-19 illness<br>Age range 20-68; 87.5% white British; 79.2% female | Four key themes reported in results:<br><br>'hard and heavy work' of enduring and managing symptoms, trying to find answers, and accessing care<br><br>living with uncertainty and fear                                                                                                                                             |

|                                               |                                                                                                                                                                                                                                                                    |                                                                                                                                                           |                                                                                                                                                                                                                                                    |
|-----------------------------------------------|--------------------------------------------------------------------------------------------------------------------------------------------------------------------------------------------------------------------------------------------------------------------|-----------------------------------------------------------------------------------------------------------------------------------------------------------|----------------------------------------------------------------------------------------------------------------------------------------------------------------------------------------------------------------------------------------------------|
|                                               | call (duration 35-90 minutes)                                                                                                                                                                                                                                      |                                                                                                                                                           | importance of finding the 'right' GP                                                                                                                                                                                                               |
|                                               | Thematic analysis using principles of constant comparison                                                                                                                                                                                                          |                                                                                                                                                           | recovery and rehabilitation: what would help?                                                                                                                                                                                                      |
| Ladds <i>et al.</i> (2020) <sup>18</sup> [UK] | Participants recruited from UK-based long COVID patient support groups, social media and snowball sampling<br><br>Individual narrative interview (telephone or video) or participation in an online focus group<br><br>Constant comparison method of data analysis | Total n = 114<br><br>55 interviews (73% female); median age 48 (range 31-68)<br><br>59 focus group participants (68% female); median age 43 (range 27-73) | Five key themes reported in results:<br><br>the illness experience,<br><br>accessing care,<br><br>relationships (or lack of) with clinicians,<br><br>emotional touchpoints in encounters with health services,<br><br>ideas for improving services |
| Maxwell (2020) <sup>1</sup> [UK]              | Focus group of COVID-19 Facebook group members                                                                                                                                                                                                                     | Not reported                                                                                                                                              | Four key themes reported in results:<br><br>expectations,<br><br>symptom journey,<br><br>being doubted,<br><br>support                                                                                                                             |

Table 2 CASP critical appraisal of using the checklist for qualitative studies

|                                                       | <b>Assaf et al.<sup>19</sup></b> | <b>Kingston et al.<sup>17</sup></b> | <b>Ladds et al.<sup>18</sup></b> | <b>Maxwell<sup>1</sup></b> | <b>Davis et al.<sup>16</sup></b> |
|-------------------------------------------------------|----------------------------------|-------------------------------------|----------------------------------|----------------------------|----------------------------------|
| <b>Clear aims statement</b>                           | Y                                | Y                                   | Y                                | N                          | Y                                |
| <b>Appropriate methodology</b>                        | U                                | Y                                   | Y                                | Y                          | Y                                |
| <b>Appropriate research design</b>                    | U                                | Y                                   | Y                                | U                          | Y                                |
| <b>Appropriate recruitment</b>                        | Y                                | Y                                   | Y                                | U                          | Y                                |
| <b>Appropriate data collection</b>                    | U                                | Y                                   | Y                                | U                          | Y                                |
| <b>Researcher-participant relationship considered</b> | N                                | U                                   | U                                | U                          | U                                |
| <b>Ethical issues considered</b>                      | U                                | Y                                   | Y                                | U                          | Y                                |
| <b>Rigorous data analysis</b>                         | U                                | Y                                   | Y                                | N                          | U                                |
| <b>Clear statement of findings</b>                    | U                                | Y                                   | Y                                | Y                          | Y                                |

Y=criterion satisfied; N=criterion not satisfied; U=unclear if criterion satisfied

1  
2  
3  
4  
5  
6  
7  
8  
9  
10  
11  
12  
13  
14  
15  
16  
17  
18  
19  
20  
21  
22  
23  
24  
25  
26  
27  
28  
29  
30  
31  
32  
33  
34  
35  
36  
37  
38  
39  
40  
41  
42  
43  
44  
45  
46  
47  
48  
49  
50  
51  
52  
53  
54  
55  
56  
57  
58  
59  
60

For peer review only



## PRISMA 2009 Flow Diagram



From: Moher D, Liberati A, Tetzlaff J, Altman DG, The PRISMA Group (2009). Preferred Reporting Items for Systematic Reviews and Meta-Analyses: The PRISMA Statement. PLoS Med 6(7): e1000097. doi:10.1371/journal.pmed1000097

For more information, visit [www.prisma-statement.org](http://www.prisma-statement.org).

For peer review only - <http://bmjopen.bmj.com/site/about/guidelines.xhtml>

1  
2  
3  
4  
5  
6  
7  
8  
9  
10  
11  
12  
13  
14  
15  
16  
17  
18  
19  
20  
21  
22  
23  
24  
25  
26  
27  
28  
29  
30

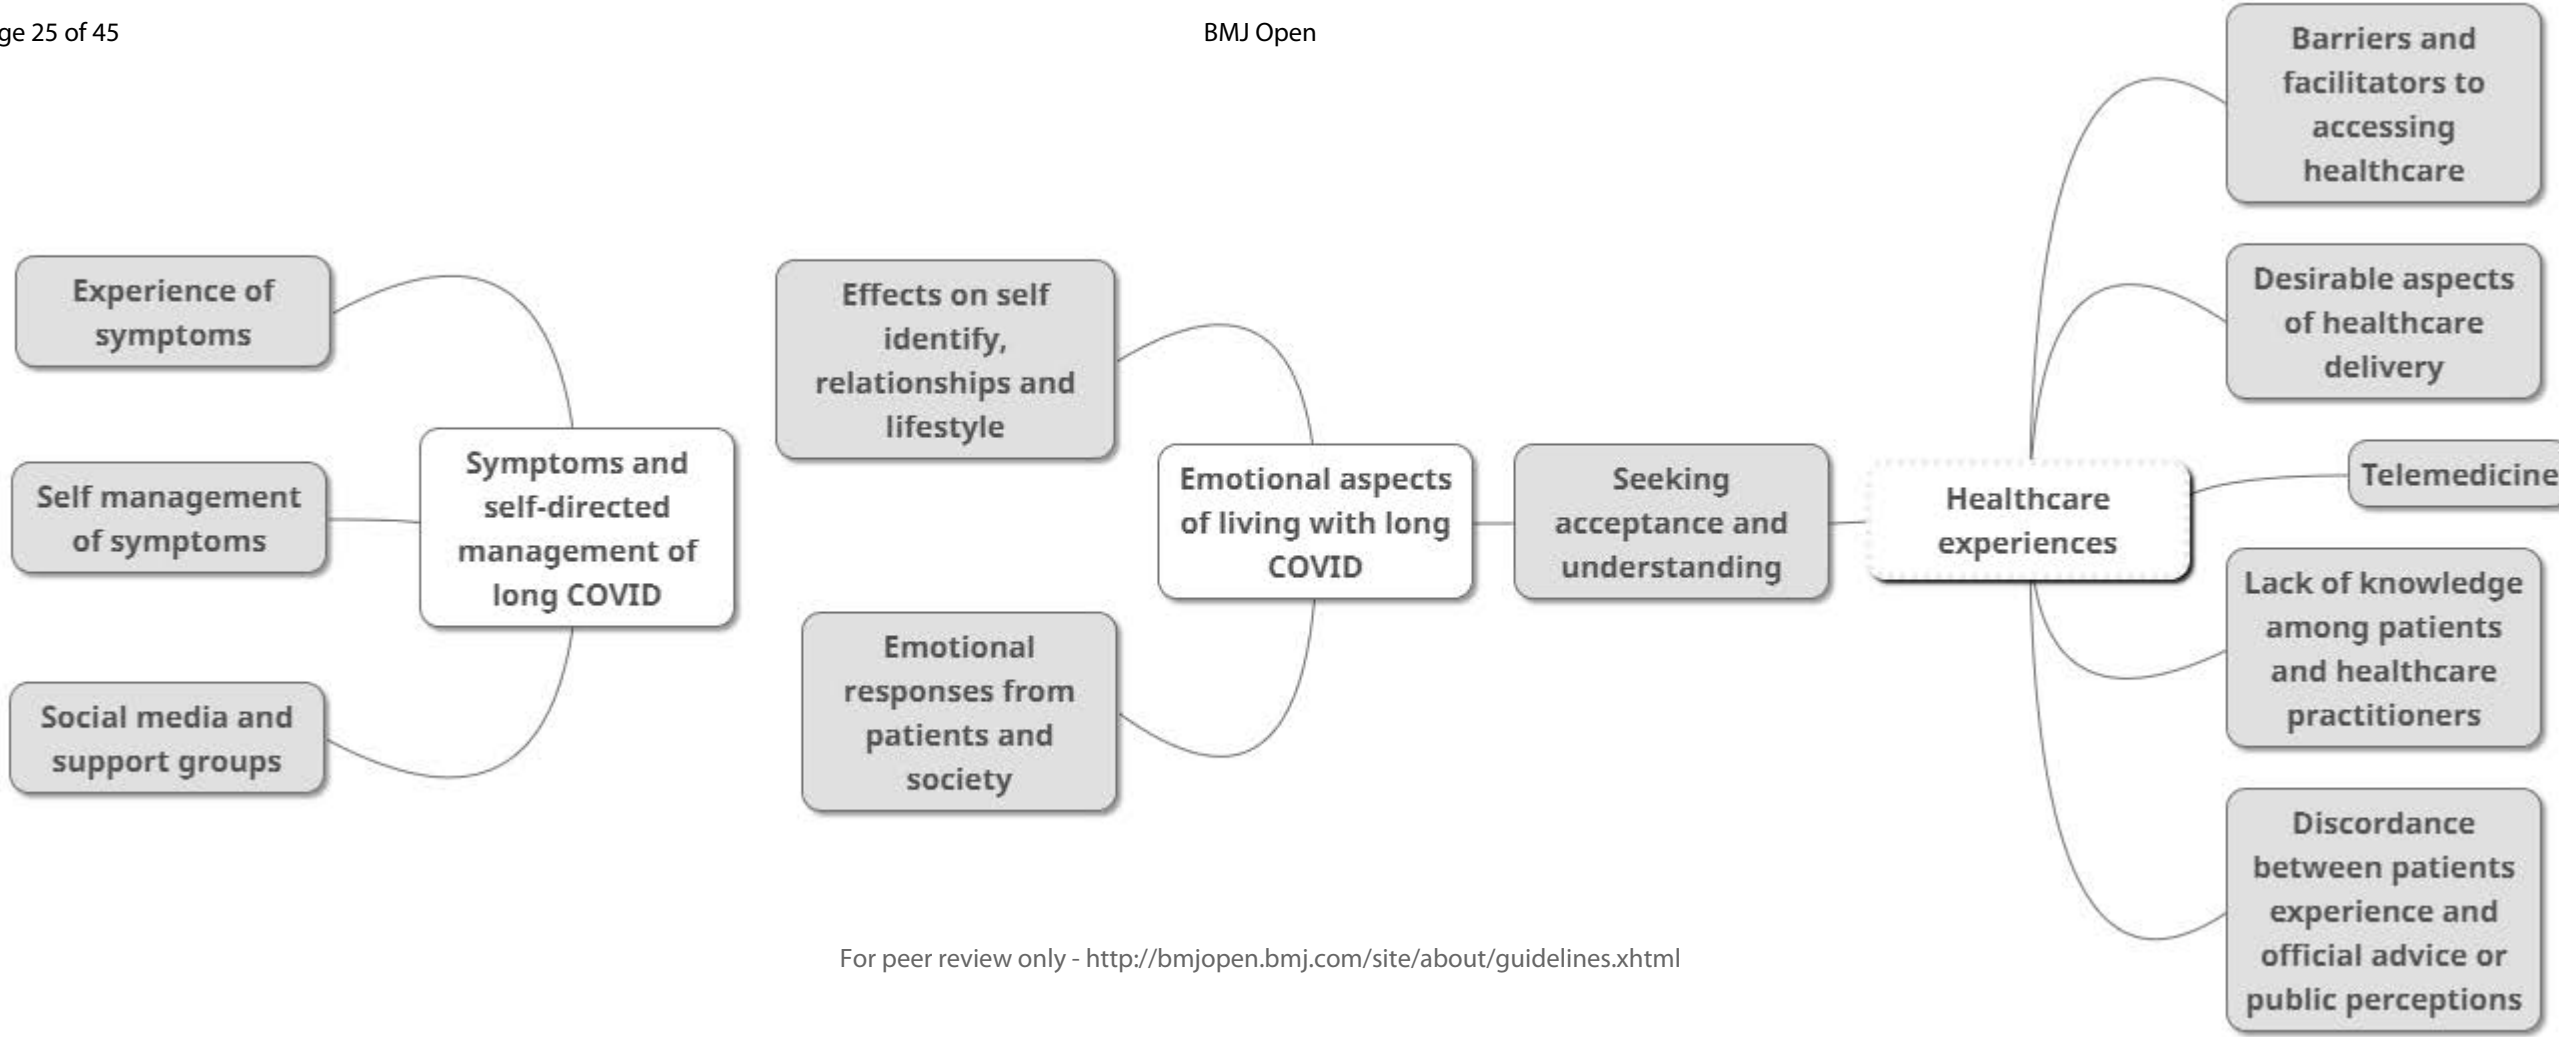

## SUPPLEMENTARY MATERIAL

### Supplementary file 1 Inclusion criteria

| Criteria              | Notes                                                                                                                                                                                                                                                    |
|-----------------------|----------------------------------------------------------------------------------------------------------------------------------------------------------------------------------------------------------------------------------------------------------|
| Population            | Adults and children experiencing new or ongoing symptoms: <ul style="list-style-type: none"> <li>• 4–12 weeks from onset of acute COVID-19 illness</li> <li>• 12 weeks from onset of acute COVID-19 illness</li> </ul>                                   |
| Phenomena of interest | Signs and symptoms of post-COVID-19 syndrome<br>Access to services<br>How symptoms were assessed<br>Management of symptoms and rehabilitation<br>Patient care pathway<br>Information and support provided<br>Communication with healthcare professionals |
| Comparators           | Not applicable                                                                                                                                                                                                                                           |
| Outcomes              | The outcomes will be generated using emergent coding, but are expected to include experiences, views and perceptions of individuals, families or carers on the factors of interest listed (such as Patient Reported Experience Measures)                 |
| Settings              | Any                                                                                                                                                                                                                                                      |
| Sub-groups            | Equality groups, for example, age, gender, ethnicity<br>Diagnosis of COVID-19 (e.g. confirmed or high clinical suspicion)<br>Duration of symptoms                                                                                                        |
| Study types           | Systematic reviews of qualitative studies<br>Qualitative studies that collect data from focus groups or interviews<br>Studies that collect qualitative data from questionnaires / surveys<br>Mixed method study designs (including qualitative element)  |
| Countries             | Any                                                                                                                                                                                                                                                      |
| Timepoints            | Any                                                                                                                                                                                                                                                      |
| Other exclusions      | None                                                                                                                                                                                                                                                     |



1  
2  
3 **Supplementary file 2 Sources searched and MEDLINE search strategy**  
4  
5

|    |                                                                    |
|----|--------------------------------------------------------------------|
| 6  | <b>UK national health service and government websites</b>          |
| 7  | <a href="#">Public Health England</a>                              |
| 8  | <a href="#">Public Health Scotland</a>                             |
| 9  | <a href="#">Scottish Government</a>                                |
| 10 | <a href="#">UK Government</a>                                      |
| 11 | <b>National/international policy sources</b>                       |
| 12 | <a href="#">European Centre for Disease Control</a>                |
| 13 | <a href="#">Health Protection Scotland COVID-19 Compendium</a>     |
| 14 | <b>Guidelines</b>                                                  |
| 15 | <a href="#">National Institute of Health</a>                       |
| 16 | <a href="#">NICE</a>                                               |
| 17 | <a href="#">SIGN</a>                                               |
| 18 | <b>Evidence summaries and collections</b>                          |
| 19 | <a href="#">Analytical Collaboration for COVID-19</a>              |
| 20 | <a href="#">Cochrane Special Collection</a>                        |
| 21 | <a href="#">COVID-19 Best Evidence Front Door</a>                  |
| 22 | <a href="#">COVID-19 Evidence Reviews</a>                          |
| 23 | <a href="#">Evidence Aid Collection</a>                            |
| 24 | <a href="#">McMaster rapid review database</a>                     |
| 25 | <a href="#">Oxford Centre for Evidence-Based Medicine</a>          |
| 26 | <b>HTAs</b>                                                        |
| 27 | <a href="#">ECRI</a>                                               |
| 28 | <a href="#">Health Technology Wales</a>                            |
| 29 | <a href="#">National Institute for Health Research</a>             |
| 30 | <a href="#">NICE</a>                                               |
| 31 | <b>Specialist Databases</b>                                        |
| 32 | <a href="#">Epistemonikos</a>                                      |
| 33 | <a href="#">EPPI Centre: living systematic map of the evidence</a> |
| 34 | <a href="#">ProQuest</a>                                           |
| 35 | <a href="#">PubMed LitCovid</a>                                    |
| 36 | <a href="#">WHO database of publications</a>                       |
| 37 | <b>Preprints</b>                                                   |
| 38 | <a href="#">bioRxiv</a>                                            |
| 39 | <a href="#">medRxiv</a>                                            |
| 40 | <b>Research centres/organisations</b>                              |
| 41 | <a href="#">Campbell Collaboration</a>                             |
| 42 | <a href="#">Centre for Qualitative Research</a>                    |
| 43 | <a href="#">Health Foundation</a>                                  |
| 44 | <a href="#">King's Fund</a>                                        |
| 45 | <b>Patient issues</b>                                              |
| 46 | <a href="#">Carers UK</a>                                          |
| 47 | <a href="#">Health Talk</a>                                        |
| 48 | <a href="#">Involve</a>                                            |
| 49 | <a href="#">James Lind Alliance</a>                                |
| 50 |                                                                    |
| 51 |                                                                    |
| 52 |                                                                    |
| 53 |                                                                    |
| 54 |                                                                    |
| 55 |                                                                    |
| 56 |                                                                    |
| 57 |                                                                    |
| 58 |                                                                    |
| 59 |                                                                    |
| 60 |                                                                    |

|                                                                |
|----------------------------------------------------------------|
| <a href="#">King's Fund Patient Experience Blog</a>            |
| <a href="#">National Association for Patient Participation</a> |
| <a href="#">National Voices</a>                                |
| <a href="#">Our Covid Voices</a>                               |
| <a href="#">Patient UK Discussion Forums</a>                   |
| <a href="#">Patient Views</a>                                  |
| <a href="#">Patient Voices</a>                                 |
| <a href="#">Patients Association</a>                           |
| <a href="#">Picker Institute</a>                               |
| <b>Primary literature (bibliographic databases)</b>            |
| <a href="#">MEDLINE</a>                                        |
| <a href="#">PsycINFO</a>                                       |
| <a href="#">Web of Science</a>                                 |

### Medline search strategy

- 1 exp coronavirus/
- 2 exp Coronavirus Infections/
- 3 ((corona\* or corono\*) adj1 (virus\* or viral\* or virinae\*)).ti,ab,kw,kf.
- 4 (coronavirus\* or coronavir\* or coronavirinae\* or CoV).ti,ab,kw,kf.
- 5 ("2019-nCoV" or 2019nCoV or nCoV2019 or "nCoV-2019" or "COVID-19" or COVID19 or "CORVID-19" or CORVID19 or "WN-CoV" or WNCov or "HCoV-19" or HCoV19 or "2019 novel\*" or Ncov or "n-cov" or "SARS-CoV-2" or "SARSCoV-2" or "SARSCoV2" or "SARS-CoV2" or SARSCov19 or "SARS-Cov19" or "SARSCov-19" or "SARS-Cov-19" or Ncover or Ncorona\* or Ncorono\* or NcovWuhan\* or NcovHubei\* or NcovChina\* or NcovChinese\* or SARS2 or "SARS-2" or SARSCoronavirus2 or "SARS-coronavirus-2" or "SARSCoronavirus 2" or "SARS coronavirus2" or SARSCoronavirus2 or "SARS-coronavirus-2" or "SARSCoronavirus 2" or "SARS coronavirus2").ti,ab,kw,kf.
- 6 (((respiratory\* adj2 (symptom\* or disease\* or illness\* or condition\*)) or "seafood market\*" or "food market\*" or pneumonia\*) adj10 (Wuhan\* or Hubei\* or China\* or Chinese\* or Huanan\*)).ti,ab,kw,kf.
- 7 ((outbreak\* or wildlife\* or pandemic\* or epidemic\*) adj1 (China\* or Chinese\* or Huanan\*)).ti,ab,kw,kf.
- 8 "severe acute respiratory syndrome\*".ti,ab,kw,kf.
- 9 SARS Virus/
- 10 ("SARSCoV" or "SARS-CoV" or "SARS Cov" or SARSCoronavirus or "SARS-coronavirus" or "SARS coronavirus" or SARSCoronavirus or "SARS-coronavirus" or "SARS coronavirus").ti,ab,kw,kf.
- 11 Middle East Respiratory Syndrome Coronavirus/
- 12 "Middle East\* respiratory syndrome".ti,ab,kw,kf.
- 13 ("MERSCoV" or "MERS-CoV" or "MERS Cov" or MERSCoronavirus or "MERS - coronavirus" or "MERS coronavirus" or MERSCoronavirus or "MERS-coronavirus" or "MERS Coronavirus" or "camel flu").ti,ab,kw,kf.
- 14 or/1-13
- 15 exp Patient Satisfaction/
- 16 ((patient\* or carer\* or family) adj2 (experience\* or view\* or perspective\* or preference\* or attitude\* or expectation\* or satisfaction)).tw.

1  
2  
3  
4  
5  
6  
7  
8  
9  
10  
11  
12  
13  
14  
15  
16  
17  
18  
19  
20  
21  
22  
23  
24  
25  
26  
27  
28  
29  
30  
31  
32  
33  
34  
35  
36  
37  
38  
39  
40  
41  
42  
43  
44  
45  
46  
47  
48  
49  
50  
51  
52  
53  
54  
55  
56  
57  
58  
59  
60

17 15 or 16  
18 14 and 17

For peer review only

## Supplementary file 3 Summary of key themes relating to the views and experiences of patients, their families and carers

| Themes and sub-themes                     | Summary of sub-themes                                                                                  | Supporting example                                                                                                                                                                                                                                                                                                                                                                                                                                                                                                                                                        |
|-------------------------------------------|--------------------------------------------------------------------------------------------------------|---------------------------------------------------------------------------------------------------------------------------------------------------------------------------------------------------------------------------------------------------------------------------------------------------------------------------------------------------------------------------------------------------------------------------------------------------------------------------------------------------------------------------------------------------------------------------|
| <b>Theme: experience of symptoms</b>      |                                                                                                        |                                                                                                                                                                                                                                                                                                                                                                                                                                                                                                                                                                           |
| Range of symptoms                         | Patients described a wide range of symptoms, not all of which were recognised as symptoms of COVID-19. | <p>“The symptoms were like a game of whack-a-mole. Different ones would surge at different times and in different places in my body.” (Assaf <i>et al</i>)<sup>19</sup></p> <p>“From week four I started to get chest pains and then breathlessness, gradually other symptoms developed including dry mouth, sore tongue, joint pains, fatigue, rash and tachycardia.” (Maxwell)<sup>1</sup></p>                                                                                                                                                                          |
| Severity of symptoms                      | Symptoms ranged from mild to potentially life-threatening.                                             | <p>“I've been absolutely floored... I've got all sorts of... I've got vasculitis, which I think is a common thing... And I've been left with nerve issues, like really horrible nerve... stabbing pains in my hands and feet and I can't move my toes any more... unfortunately, my journey is far from over.” (Ladds <i>et al</i>)<sup>18</sup></p> <p>“From week four I started to get chest pains and then breathlessness, gradually other symptoms developed including dry mouth, sore tongue, joint pains, fatigue, rash and tachycardia.” (Maxwell)<sup>1</sup></p> |
| Duration and lingering nature of symptoms | Symptoms were experienced for a prolonged but variable length of time.                                 | “He was sleeping for about 20 hours a day, 20 hours out of every 24 and he's still sleeping now, five and half months after, he still sleeps an awful lot, sat up, not lay down, sat up, he's just totally exhausted.” (Kingstone <i>et al</i> ) <sup>17</sup>                                                                                                                                                                                                                                                                                                            |

1  
2  
3  
4  
5  
6  
7  
8  
9  
10  
11  
12  
13  
14  
15  
16  
17  
18  
19  
20  
21  
22  
23  
24  
25  
26  
27  
28  
29  
30  
31  
32  
33  
34  
35  
36  
37  
38  
39  
40  
41  
42  
43  
44  
45  
46

| Themes and sub-themes                                                                           | Summary of sub-themes                                                                                                                                                                                                                                                                           | Supporting example                                                                                                                                                                                                                                                                                                                                                                                                                                 |
|-------------------------------------------------------------------------------------------------|-------------------------------------------------------------------------------------------------------------------------------------------------------------------------------------------------------------------------------------------------------------------------------------------------|----------------------------------------------------------------------------------------------------------------------------------------------------------------------------------------------------------------------------------------------------------------------------------------------------------------------------------------------------------------------------------------------------------------------------------------------------|
| Fluctuating or cumulative nature of symptoms                                                    | Patients described symptoms ‘coming and going’, and of new symptoms being added to existing ones over time.                                                                                                                                                                                     | “...From week four I started to get chest pains and then breathlessness, gradually other symptoms developed .... The following weeks were frightening as symptoms fluctuated; sometimes thinking that you were improving and then very disheartening when they returned.... After nearly 6 months I have started to feel some improvement, although doing anything remotely physical results in a flare up of symptoms....” (Maxwell) <sup>1</sup> |
| <b>Theme: discordance between patient experiences and official advice or public perceptions</b> |                                                                                                                                                                                                                                                                                                 |                                                                                                                                                                                                                                                                                                                                                                                                                                                    |
| Disconnect between official advice and lived experience                                         | Patients found official advice on graded exercise and when to come out of isolation unhelpful and contrary to their lived experience of long COVID.                                                                                                                                             | “Well, one of the things that really bugged me about it was the talking about graded exercise and I’ve learnt from experience that pushing myself even a tiny bit has massive consequences ...” (Kingstone <i>et al</i> , p6) <sup>17</sup>                                                                                                                                                                                                        |
| Disconnect between public perception (“labels”) and lived experience                            | The perception that COVID-19 is a binary illness that is either ‘mild’ or very serious (requiring hospitalisation) was unhelpful and contrasted with patient experience.                                                                                                                        | “So, COVID-19, it’s either a mild infection or you die? No. But no one is prepared to think about us.” (Kingstone <i>et al</i> ) <sup>2</sup><br><br>“I think the term "mild" should be removed... I know that people who were admitted to the hospital were worse, but we who stayed home did not have MILD cases in all cases” (Maxwell) <sup>1</sup>                                                                                            |
| Disconnect between expected/official timeframes and lived experience                            | Patients expected COVID-19 to last approximately 2 weeks, in line with official estimates, and were then confronted by much longer-term illness. Patients experiencing symptoms beyond the 2-week period are often diagnosed with an alternative condition that more neatly fits the timeframe. | “I went back to work too soon and wish I hadn’t. Finally had to take a 5 week break in July/ August with the support of my employer. This helped a lot. I have now been back at work for 5 weeks and my symptoms have got worse to a degree.” (Davis <i>et al</i> ) <sup>16</sup>                                                                                                                                                                  |

| Themes and sub-themes                                                            | Summary of sub-themes                                                                                                                                                                     | Supporting example                                                                                                                                                                                                                                                                                                                                                                                                                                                                                                                                                                                                                                                                                                                                                                                                                             |
|----------------------------------------------------------------------------------|-------------------------------------------------------------------------------------------------------------------------------------------------------------------------------------------|------------------------------------------------------------------------------------------------------------------------------------------------------------------------------------------------------------------------------------------------------------------------------------------------------------------------------------------------------------------------------------------------------------------------------------------------------------------------------------------------------------------------------------------------------------------------------------------------------------------------------------------------------------------------------------------------------------------------------------------------------------------------------------------------------------------------------------------------|
| Disconnect between officially recognised symptoms and lived experience           | There is discordance between the range of symptoms articulated by patients with long-term illness and those officially recognised by authorities as COVID-19.                             | “If the message hadn’t been [to expect to recover in] around two weeks, I’d have been more cautious at first, ... the doctor I saw in A/E described Covid as the gift that keeps on giving and at four weeks I thought that felt like a long time, and now five months on it feels like a very long time” (Maxwell, p11) <sup>1</sup>                                                                                                                                                                                                                                                                                                                                                                                                                                                                                                          |
| Impact of disconnect between officially recognised symptoms and lived experience | As a consequence of the mismatch between officially recognised symptoms and lived experience of long COVID, patients feel ignored, dismissed, and may be misdiagnosed.                    | “Despite having been diagnosed with suspected Covid by my GP and a doctor in a Covid clinic (swab testing wasn’t available to the public at the time) and told I had pleurisy during a visit to A&E two weeks earlier, the doctor on duty didn’t take this into account. Instead, he dismissed me with anxiety, advising a course of anti-depressants, and chose not to investigate these concerning symptoms further. Of course I was anxious, but that was a consequence of the physical symptoms, not the cause! I would later learn from a neurologist that what I experienced on that day were clear neurological symptoms that should have been investigated promptly. To be brushed off like this when so little was known at the time of the damage Covid can cause was disheartening and very upsetting.” (Maxwell, p15) <sup>1</sup> |
| <b>Theme: self management of symptoms</b>                                        |                                                                                                                                                                                           |                                                                                                                                                                                                                                                                                                                                                                                                                                                                                                                                                                                                                                                                                                                                                                                                                                                |
| Self care and lifestyle adjustment                                               | Patients attempted various forms of self care, such as taking supplements, and made adjustments to their lifestyle, for example by reducing physical activity, to accommodate long COVID. | “I mean initially I started taking vitamin D. Had a joint vitamin C and zinc thing, which I didn’t take every day but I took some multivitamins, but then I was a bit unsure really ... my husband’s quite anti-vitamin use ... So anyway, then I took nothing for a while, and then I more recently started the vitamin D again, and I’m on                                                                                                                                                                                                                                                                                                                                                                                                                                                                                                   |

1  
2  
3  
4  
5  
6  
7  
8  
9  
10  
11  
12  
13  
14  
15  
16  
17  
18  
19  
20  
21  
22  
23  
24  
25  
26  
27  
28  
29  
30  
31  
32  
33  
34  
35  
36  
37  
38  
39  
40  
41  
42  
43  
44  
45  
46

| Themes and sub-themes                                       | Summary of sub-themes                                                                                                                                                                    | Supporting example                                                                                                                                                                                                                                                                                              |
|-------------------------------------------------------------|------------------------------------------------------------------------------------------------------------------------------------------------------------------------------------------|-----------------------------------------------------------------------------------------------------------------------------------------------------------------------------------------------------------------------------------------------------------------------------------------------------------------|
|                                                             |                                                                                                                                                                                          | B12 just because of all the burning in my feet ... and a probiotic and some omega-3." (Kingstone <i>et al</i> ) <sup>17</sup>                                                                                                                                                                                   |
| Pacing and goal setting                                     | The importance of pacing yourself and setting realistic goals was highlighted by patients.                                                                                               | "...I really have to pace myself... I couldn't do two or three household chores back to back, I have to do a chore, sit down for 15, 20 minutes and then do the next, which frustrates me...." (Kingstone <i>et al</i> ) <sup>17</sup>                                                                          |
| <b>Theme: emotional responses from patients and society</b> |                                                                                                                                                                                          |                                                                                                                                                                                                                                                                                                                 |
| Helplessness                                                | Long-term symptoms were associated with a feeling of helplessness.                                                                                                                       | "Most participants continued the discussion after the digital recorder was turned off, emphasising their own feelings of helplessness, but also alluding to the uncertainty and helplessness that GPs had admitted to" (Kingstone <i>et al</i> ) <sup>17</sup> [Author quote]                                   |
| Anxiety                                                     | Patients described anxiety about the prospect of not recovering, uncertainty over the cause of symptoms, not being believed, and some of the content they read on online support groups. | "... I was really frightened, terrified and just thought I might die on a couple of occasions ... maybe not "I'm going to die right now", but definitely "I'm never going to get better from this" kind of feeling." (Kingstone <i>et al</i> ) <sup>17</sup>                                                    |
| Relief                                                      | A sense of relief was associated with finding a healthcare professional that believed the patient.                                                                                       | "I finally found a GP who took me seriously last Saturday when I was at the point of crying talking to her, just understanding that people's symptoms are real and diverse." (Maxwell) <sup>1</sup>                                                                                                             |
| Stigma (externally generated)                               | Employers and others drive a fear of being stigmatised over long COVID.                                                                                                                  | "Healthcare staff was fearful and I was turned away with no support" (Assaf <i>et al</i> ) <sup>19</sup><br><br>"I had to take two weeks off, had to work from home for four, but had to return for two weeks with fever as my employer would not give me more time [...]." (Davis <i>et al</i> ) <sup>16</sup> |

| Themes and sub-themes                                               | Summary of sub-themes                                                                                                                                   | Supporting example                                                                                                                                                                                                                                                                                                                                                                                                                                                                                                                                                                                                                                                                                 |
|---------------------------------------------------------------------|---------------------------------------------------------------------------------------------------------------------------------------------------------|----------------------------------------------------------------------------------------------------------------------------------------------------------------------------------------------------------------------------------------------------------------------------------------------------------------------------------------------------------------------------------------------------------------------------------------------------------------------------------------------------------------------------------------------------------------------------------------------------------------------------------------------------------------------------------------------------|
| Stigma (internally generated)                                       | Patients experienced a sense of shame and blame consistent with stigma.                                                                                 | "Fearful of people around me finding out and overreacting / treating me differently" (Assaf <i>et al</i> ) <sup>19</sup>                                                                                                                                                                                                                                                                                                                                                                                                                                                                                                                                                                           |
| <b>Theme: effects on self-identity, relationships and lifestyle</b> |                                                                                                                                                         |                                                                                                                                                                                                                                                                                                                                                                                                                                                                                                                                                                                                                                                                                                    |
| Impact on self-identify                                             | Long COVID affected self identity as a healthy, independent individual, and resulted in patients comparing themselves with a pre-COVID version of self. | "I have not had strength to return to physical activity. I did work in my house and 2 days later had a fever again after being 12 days fever free." (Assaf <i>et al</i> ) <sup>19</sup>                                                                                                                                                                                                                                                                                                                                                                                                                                                                                                            |
| Impact on daily life/work                                           | Patients had to alter their physical activity levels to accommodate long COVID and found cognitive symptoms prevented a return to work.                 | "I'm trapped, in that I can't park that far away and walk [to the shops] like I normally would because I can't do hills. I can just, in the last couple of weeks, I can do gentle inclines now, but I sort of grind to a halt on a hill. So, it's very limiting." (Ladds <i>et al</i> ) <sup>18</sup><br><br>"I wasn't just fogged, I was confused. I had a very difficult encounter as a result of just being confused about things and that took a long time to resolve. I love words and I enjoy the business of communicating, and I felt that part of my life was lost. Really, I just did admin, I didn't do anything that required clear thinking." (Kingstone <i>et al</i> ) <sup>17</sup> |
| Impact on self - reduced confidence                                 | There was a sense of loss of confidence in professional abilities among some patients.                                                                  | "Doctors and other clinicians .... described how their symptoms and the accompanying prognostic uncertainty .... had also stripped them of confidence in their professional abilities." (Ladds <i>et al</i> ) <sup>18</sup> [Author quote]                                                                                                                                                                                                                                                                                                                                                                                                                                                         |
| Impact on others/relationships                                      | Long COVID had an impact on family members as well as patients.                                                                                         | "I think, at first, they just thought, "Oh, for god's sake, she's napping again." I feel like I constantly have to explain. I'm just exhausted and I just want to know why I'm so exhausted .... I used to enjoy running, and                                                                                                                                                                                                                                                                                                                                                                                                                                                                      |



1  
2  
3  
4  
5  
6  
7  
8  
9  
10  
11  
12  
13  
14  
15  
16  
17  
18  
19  
20  
21  
22  
23  
24  
25  
26  
27  
28  
29  
30  
31  
32  
33  
34  
35  
36  
37  
38  
39  
40  
41  
42  
43  
44  
45  
46

| Themes and sub-themes                                       | Summary of sub-themes                                                                                       | Supporting example                                                                                                                                                                                                                                                                                                                                                                                                                                                                                                                                                                                                                                                                                                                                                                                                                                                                                                                                                                                                                                                                                                                                                    |
|-------------------------------------------------------------|-------------------------------------------------------------------------------------------------------------|-----------------------------------------------------------------------------------------------------------------------------------------------------------------------------------------------------------------------------------------------------------------------------------------------------------------------------------------------------------------------------------------------------------------------------------------------------------------------------------------------------------------------------------------------------------------------------------------------------------------------------------------------------------------------------------------------------------------------------------------------------------------------------------------------------------------------------------------------------------------------------------------------------------------------------------------------------------------------------------------------------------------------------------------------------------------------------------------------------------------------------------------------------------------------|
|                                                             |                                                                                                             | exercising, and stuff like that. I rarely even go on walks now because I know if I walk to the end of the street, they're [lungs] going to start hurting." (Kingstone <i>et al</i> ) <sup>17</sup>                                                                                                                                                                                                                                                                                                                                                                                                                                                                                                                                                                                                                                                                                                                                                                                                                                                                                                                                                                    |
| <b>Theme: healthcare access – barriers and facilitators</b> |                                                                                                             |                                                                                                                                                                                                                                                                                                                                                                                                                                                                                                                                                                                                                                                                                                                                                                                                                                                                                                                                                                                                                                                                                                                                                                       |
| Barrier - testing                                           | Challenges were experienced with accessing testing (for long-term symptoms or COVID-19 diagnostic testing). | "... My worst and scariest experience with this illness was in week 6, when I was rushed to A&E as I had a sudden relapse of symptoms and found myself gasping for air, with the top of my head numb and tingling and a headache so blinding that I couldn't keep my eyes open. I got worse in the hospital and was shaking visibly, so much so that the nurse couldn't perform an ECG as I just couldn't stay still. Despite having been diagnosed with suspected Covid by my GP and a doctor in a Covid clinic (swab testing wasn't available to the public at the time) and told I had pleurisy during a visit to A&E two weeks earlier, the doctor on duty didn't take this into account. Instead, he dismissed me with anxiety, advising a course of anti-depressants, and chose not to investigate these concerning symptoms further. ....I would later learn from a neurologist that what I experienced on that day were clear neurological symptoms that should have been investigated promptly. To be brushed off like this when so little was known at the time of the damage Covid can cause was disheartening and very upsetting." (Maxwell) <sup>1</sup> |

| Themes and sub-themes                                   | Summary of sub-themes                                                                                                                                                      | Supporting example                                                                                                                                                                                                                                                                                                                                                                                                                                     |
|---------------------------------------------------------|----------------------------------------------------------------------------------------------------------------------------------------------------------------------------|--------------------------------------------------------------------------------------------------------------------------------------------------------------------------------------------------------------------------------------------------------------------------------------------------------------------------------------------------------------------------------------------------------------------------------------------------------|
| Barrier – primary care                                  | Difficulties accessing primary care, particularly face-to-face or through the ‘total triage’ system were a barrier to healthcare access                                    | “I was initially contacting a certain GP, and that GP literally just went “you need to stay at home and rest, there’s nothing we can do”, a.....so I started contacting a different GP, in the same practice, and it’s the same outcome, they can’t do anything else but he seems to be interested and wants to know what’s going on.” (Kingstone <i>et al</i> ) <sup>17</sup>                                                                         |
| Barrier – effort involved                               | Accessing healthcare was complex, difficult and exhausting for patients.                                                                                                   | “One day I had blue finger nails and I wasn’t cold .... and I phoned the GP and the GP answer phone said if you’ve got any of the signs of, of Covid please ring 111 and so I rang 111 and, I live in [city with high incidence of Covid-19] I don’t know if that makes any difference but I was put on hold and after over an hour, an hour and twenty minutes nobody answered so I just put the phone down ....” (Ladds <i>et al</i> ) <sup>18</sup> |
| Barrier – specialist referral                           | Few patients managed to obtain a referral to a specialist.                                                                                                                 | “...three of the referrals my GP made (two respiratory and one neurology) were refused by two different hospitals on the grounds that a) they only checked Covid confirmed patients b) that they needed extra tests which weren’t done on me at A&E” (Maxwell) <sup>1</sup>                                                                                                                                                                            |
| Perceived barrier – healthcare professionals being busy | There was a perception that healthcare professionals are too busy caring for patients with acute COVID-19 to be able to provide care for patients with long-term symptoms. | “At this point, most physicians and researchers are so overwhelmed treating the covid19 patients who are at risk of immediate death, that they don’t have the ability to even recognize that people like me exist....” (Assaf <i>et al</i> ) <sup>19</sup><br><br>“I think the message to avoid hospital and the GP unless you had specific symptoms was very unhelpful,                                                                               |

| Themes and sub-themes                                 | Summary of sub-themes                                                                                                                                                                                                                                                                                                                                                                                                                                            | Supporting example                                                                                                                                                                                                                                                                                                                                                                                    |
|-------------------------------------------------------|------------------------------------------------------------------------------------------------------------------------------------------------------------------------------------------------------------------------------------------------------------------------------------------------------------------------------------------------------------------------------------------------------------------------------------------------------------------|-------------------------------------------------------------------------------------------------------------------------------------------------------------------------------------------------------------------------------------------------------------------------------------------------------------------------------------------------------------------------------------------------------|
|                                                       |                                                                                                                                                                                                                                                                                                                                                                                                                                                                  | particularly as I didn't have, and never have had, a cough or fever" (Maxwell) <sup>1</sup>                                                                                                                                                                                                                                                                                                           |
| Perceived barrier – healthcare entitlement            | Patients had a perception that they were not entitled to healthcare for long-term symptoms of COVID-19.                                                                                                                                                                                                                                                                                                                                                          | “...I guess I felt a bit like I was ineligible for health care now. I felt like I'm just going to have to live with this at home and no one will come and see me and, you know, I'm just, yeah. It was a horrible feeling.” (Kingstone <i>et al</i> ) <sup>17</sup>                                                                                                                                   |
| Facilitator – follow-ups & check-ins                  | Regular follow up or check-in with patients with long-term symptoms was viewed as a positive aspect of healthcare.                                                                                                                                                                                                                                                                                                                                               | “... I think for the first five days after I called her she had a daily check in call with me to monitor how I'm doing so it was like a ten minute phone call every day for the first five days” (Ladds <i>et al</i> ) <sup>18</sup>                                                                                                                                                                  |
| Things patients did to access care                    | Patients engaged in a number of activities to improve their access to healthcare including: <ul style="list-style-type: none"> <li>• taking the lead in arranging consultations and "circumventing bottlenecks"</li> <li>• deliberately manipulating inflexible algorithm-driven systems to access referrals</li> <li>• accessing private healthcare to prompt NHS follow up, conducting their own research and constructing their own care pathways.</li> </ul> | “did the e-consult – I had to do it a couple of times – I kind of learned to answer the questions to get it to send a message to my GP surgery... If you say you've got heart palpitations or breathlessness it's telling you to call 111 which I didn't want to do. And so I had to downplay symptoms [laughs] to get through. I cancelled it and did it again.” (Ladds <i>et al</i> ) <sup>18</sup> |
| <b>Theme: telemedicine - limitations and benefits</b> |                                                                                                                                                                                                                                                                                                                                                                                                                                                                  |                                                                                                                                                                                                                                                                                                                                                                                                       |
| Limitation – remote consultation                      | Remote consulting was found to limit access to GPs and to restrict communication of symptoms.                                                                                                                                                                                                                                                                                                                                                                    | “... reassure me are things where I need my body actually checking which I don't think you could check online, you can't check for blood clots online, you can't check for neurological damage online can you?” (Kingstone <i>et al</i> ) <sup>17</sup>                                                                                                                                               |

| Themes and sub-themes                                                                                      | Summary of sub-themes                                                                                       | Supporting example                                                                                                                                                                                                                                                                                                                                                                                                                      |
|------------------------------------------------------------------------------------------------------------|-------------------------------------------------------------------------------------------------------------|-----------------------------------------------------------------------------------------------------------------------------------------------------------------------------------------------------------------------------------------------------------------------------------------------------------------------------------------------------------------------------------------------------------------------------------------|
| Limitation – lack of continuity                                                                            | Loss of continuity of care was particularly impactful on patients with complex presentations.               | “The focus when you do get a new GP speaking to you seems to be that they go back to the beginning ....And I think if there was the same GP who we are able to consult regularly they would build a picture of your baseline and I think that’s what’s lost with digital ways of working.” (Ladds <i>et al</i> ) <sup>18</sup>                                                                                                          |
| Limitation – protocolised care                                                                             | Strict adherence to protocols in the telemedicine context affected patient safety and led to mismanagement. | “... I remembered ringing my GP from the floor on my lounge laying on my front and kind of saying I’m really short of breath, you know, do you think I should try an inhaler do I need to go back to A&E and I was kind of told well you don’t really sound too out of breath over the phone .... I really felt at that point right if you could see me you would see that I am really like broken” (Ladds <i>et al</i> ) <sup>18</sup> |
| Benefits - accessibility                                                                                   | Positive experiences of accessing GPs through telemedicine.                                                 | “My doctor was available via messaging, telephone, and telemedicine. She also contracted COVID-19 so she shared her experience with recovery and it helped me stay calm that I was on the right track.” (Assaf <i>et al</i> ) <sup>19</sup>                                                                                                                                                                                             |
| <b>Theme: lack of knowledge, information and understanding among healthcare professionals and patients</b> |                                                                                                             |                                                                                                                                                                                                                                                                                                                                                                                                                                         |
| Lack of knowledge - healthcare professionals                                                               | There is a perceived lack of knowledge about long COVID among healthcare professionals.                     | “...I think all the way through I found doctors that I've come into contact with are just really at a bit of a loss for it. I think at the beginning, particularly when things were going on, and not clearing up it was kind of put on me as just being a strange case ... and my GP was going, “Well, you're just weird, you know”.’ (Kingstone <i>et al</i> ) <sup>17</sup>                                                          |

| Themes and sub-themes            | Summary of sub-themes                                                                                                                                                                                                                                                                                          | Supporting example                                                                                                                                                                                                                                                                                                                                                                                                                                 |
|----------------------------------|----------------------------------------------------------------------------------------------------------------------------------------------------------------------------------------------------------------------------------------------------------------------------------------------------------------|----------------------------------------------------------------------------------------------------------------------------------------------------------------------------------------------------------------------------------------------------------------------------------------------------------------------------------------------------------------------------------------------------------------------------------------------------|
| Lack of knowledge – symptoms     | The lack of knowledge around long COVID included uncertainty about the expected symptoms, wanting to learn about living with COVID-19, uncertainty about the cause of symptoms, a lack of understanding about the fluctuating nature of symptoms and lack of knowledge about recovery from long-term symptoms. | “None of us knew this [the symptoms] because we’re all on our own, in a little bubble, thinking I’m the only one. Why am I the one who has still got it?” (Maxwell) <sup>1</sup>                                                                                                                                                                                                                                                                   |
| Lack of knowledge – seeking help | Uncertainty about when patients with long COVID should seek medical help.                                                                                                                                                                                                                                      | “...combined with the UK government message to stay away from health services unless very ill, left many people uncertain about when they should seek help.” (Maxwell) <sup>1</sup> [Author quote]                                                                                                                                                                                                                                                 |
| Lack of knowledge – employers    | Employers need advice on how to manage employees with long COVID.                                                                                                                                                                                                                                              | “Advice on the range of symptoms and duration was also needed by employers who are unclear what to expect of those with ongoing effects.” (Maxwell) <sup>1</sup> [Author quote]<br><br>“I have needed more-flexible hours (working remotely) post-COVID. That way, I can rest as needed throughout the day. If I had to return to in-person work at this point, it would be severely reduced hours if at all.” (Davis <i>et al</i> ) <sup>16</sup> |
| Lack of knowledge – management   | Lack of knowledge about managing long COVID, resources available locally for patient rehabilitation, and about recovery from prolonged illness.                                                                                                                                                                | “I finally had a respiratory appointment three months later, over the phone (not over a video link). I was .... recommended graded exercise. When I then saw a rehabilitation physiotherapist, she said no, we are not going to do graded exercise because that would be counterproductive for you. ” (Maxwell) <sup>1</sup>                                                                                                                       |

| Themes and sub-themes                                                                                         | Summary of sub-themes                                                                                                              | Supporting example                                                                                                                                                                                                                                                                                                                                                                                                                               |
|---------------------------------------------------------------------------------------------------------------|------------------------------------------------------------------------------------------------------------------------------------|--------------------------------------------------------------------------------------------------------------------------------------------------------------------------------------------------------------------------------------------------------------------------------------------------------------------------------------------------------------------------------------------------------------------------------------------------|
| Lack of knowledge – prompts help-seeking from other sources                                                   | Lack of widely accessible medical knowledge about long COVID has led to patient reliance on news and social media for information. | “At least I know I'm not alone. And I think people who actually have had the disease tend to know a little bit more about it. So, you know, sixth sense, I actually think that the support group has given more knowledge than the doctors have.” (Ladds <i>et al</i> ) <sup>18</sup>                                                                                                                                                            |
| Patients prefer healthcare professionals to admit uncertainty                                                 | Patients would prefer healthcare professionals to admit to a lack of knowledge about long COVID.                                   | “She just listens a little bit more to what I'm saying and she's much more willing to say, “Of course, we don't really know what's going on because it's a new virus.” She doesn't try to pretend that she understands what's going on, which is good.” (Kingstone <i>et al</i> ) <sup>17</sup>                                                                                                                                                  |
| <b>Theme: desirable features of healthcare services/service delivery</b>                                      |                                                                                                                                    |                                                                                                                                                                                                                                                                                                                                                                                                                                                  |
| Healthcare structuring – one stop clinics with face-to-face assessment of symptoms by multidisciplinary teams | Patients wanted a ‘one-stop’ clinic with multidisciplinary teams there to assess symptoms affecting a wide range of body systems.  | “What would be most helpful is if all main hospitals could have a Covid clinic that had experts from respiratory, cardiology, rheumatology, neurology, physiotherapy etc, so you could go along for half a day and see people from these different departments, they can refer you for tests and you can get a plan in place, We are having such a range of symptoms that GPs are struggling to know what to do with you” (Maxwell) <sup>1</sup> |
| Healthcare structuring – case management                                                                      | A case manager or single clinician to co-ordinate investigations and the patient care pathway for each patient with long COVID.    | “... there was a view that it would be helpful if people living with Covid19 could have a ‘quarter back’ or case manager to oversee and coordinate investigations and support services across different medical specialities.” (Maxwell) <sup>1</sup>                                                                                                                                                                                            |
| Healthcare structuring – MDT rehabilitation                                                                   | Assessment by a multidisciplinary rehabilitation team was proposed.                                                                | “... the British Society of Rehabilitation Medicine notes there are people who were never admitted to hospital but who still have ongoing needs for rehabilitation                                                                                                                                                                                                                                                                               |

| Themes and sub-themes                                                      | Summary of sub-themes                                                                                                                      | Supporting example                                                                                                                                                                                                                                           |
|----------------------------------------------------------------------------|--------------------------------------------------------------------------------------------------------------------------------------------|--------------------------------------------------------------------------------------------------------------------------------------------------------------------------------------------------------------------------------------------------------------|
|                                                                            |                                                                                                                                            | support after recovering from Covid, or Covid-like symptoms." (Maxwell) <sup>1</sup> [Author quote]                                                                                                                                                          |
| Individual - acceptance of patient experiences by healthcare professionals | Empathetic health professionals that accepted patient experiences were desirable to individuals.                                           | "I finally found a GP who took me seriously last Saturday when I was at the point of crying talking to her, just understanding that people's symptoms are real and diverse." (Maxwell) <sup>1</sup>                                                          |
| Individual - practical coping strategies                                   | Patients wanted practical advice on coping strategies.                                                                                     | "... members understood that there were no magic cures, but were looking for practical advice on coping strategies that go beyond basic advice." (Maxwell) <sup>1</sup> [Author quote]                                                                       |
| <b>Theme: social media and support groups</b>                              |                                                                                                                                            |                                                                                                                                                                                                                                                              |
| Support through sharing experiences                                        | Online support groups and social media provided opportunities for sharing experiences of long COVID.                                       | "when I found the Long Covid Facebook group that I realised I wasn't alone, thousands of people were in the same situation. Knowing this helped enormously." (Maxwell) <sup>1</sup>                                                                          |
| Support through sharing knowledge                                          | Online support groups and social media provided opportunities for sharing knowledge and resource links with others coping with long COVID. | "At least I know I'm not alone. And I think people who actually have had the disease tend to know a little bit more about it... I actually think that the support group has given more knowledge than the doctors have." (Ladds <i>et al</i> ) <sup>18</sup> |
| Validation of experiences                                                  | Patients found validation of their experiences in communication with others through online support groups.                                 | "many participants – both men and women – found that online peer support groups offered the greatest source of support through shared experiences, knowledge and validation." (Ladds <i>et al</i> ) <sup>18</sup> [Author quote]                             |
| <b>Theme: seeking acceptance and understanding</b>                         |                                                                                                                                            |                                                                                                                                                                                                                                                              |
| Perception of being doubted by healthcare professionals                    | Healthcare professionals were perceived to doubt patient symptoms were related to COVID-19 and to doubt symptom severity.                  | "There was one GP who just thought it was all anxiety ... she said, "There's nothing wrong with your lungs. This is all anxiety. You must treat your anxiety. There's                                                                                        |

| Themes and sub-themes                                    | Summary of sub-themes                                                                                                             | Supporting example                                                                                                                                                                                                                                                                                                                                                                                                                                                         |
|----------------------------------------------------------|-----------------------------------------------------------------------------------------------------------------------------------|----------------------------------------------------------------------------------------------------------------------------------------------------------------------------------------------------------------------------------------------------------------------------------------------------------------------------------------------------------------------------------------------------------------------------------------------------------------------------|
|                                                          |                                                                                                                                   | nothing wrong with you. How are you going to manage the pandemic if you don't treat your anxiety?" That was really upsetting because I knew I was short of breath..." (Kingstone <i>et al</i> ) <sup>17</sup>                                                                                                                                                                                                                                                              |
| Perception of being doubted by friends and family        | There was a perception that friends and family doubted patients because symptoms were not always obvious.                         | "... one of my friends did say after quite a while, "I'm not being awful, but do you think a lot of it's in his mind?" and I said "no". I was quite upset about that..." (Kingstone <i>et al</i> ) <sup>17</sup>                                                                                                                                                                                                                                                           |
| Perception of being ignored                              | Patients felt that their condition was not given the recognition that it deserved.                                                | "So, COVID-19, it's either a mild infection or you die? No. But no one is prepared to think about us." (Kingstone <i>et al</i> ) <sup>17</sup><br><br>"I felt the medical team was dismissive. There were a lot of 'we don't know.' Which is understandable, but difficult." (Assaf <i>et al</i> ) <sup>19</sup>                                                                                                                                                           |
| Difficulties finding empathetic healthcare professionals | Challenges were described in finding healthcare professionals willing to show empathy and accept patient experiences of symptoms. | "I was initially contacting a certain GP, and that GP literally just went "you need to stay at home and rest, there's nothing we can do", and that frustrated me because it didn't seem like they were being caring, it felt like I was nagging them and being a hypochondriac..." (Kingstone <i>et al</i> ) <sup>17</sup><br><br>"Because I've spoken to four different GPs throughout this. I've not found them very helpful..." (Kingstone <i>et al</i> ) <sup>17</sup> |
| Misdiagnosis or dismissal by healthcare professionals    | Dismissal of symptoms or misdiagnoses were associated with a negative perception of healthcare.                                   | "I was initially contacting a certain GP, and that GP literally just went "you need to stay at home and rest, there's nothing we can do", and that frustrated me because it didn't seem like they were being caring, it                                                                                                                                                                                                                                                    |



1  
2  
3  
4  
5  
6  
7  
8  
9  
10  
11  
12  
13  
14  
15  
16  
17  
18  
19  
20  
21  
22  
23  
24  
25  
26  
27  
28  
29  
30  
31  
32  
33  
34  
35  
36  
37  
38  
39  
40  
41  
42  
43  
44  
45  
46

| Themes and sub-themes                                                                                                  | Summary of sub-themes                                                                                                                                 | Supporting example                                                                                                                                                                                                                                                                                                                                         |
|------------------------------------------------------------------------------------------------------------------------|-------------------------------------------------------------------------------------------------------------------------------------------------------|------------------------------------------------------------------------------------------------------------------------------------------------------------------------------------------------------------------------------------------------------------------------------------------------------------------------------------------------------------|
|                                                                                                                        |                                                                                                                                                       | felt like I was nagging them and being a hypochondriac and that’s how I was being treated...” (Kingstone <i>et al</i> ) <sup>17</sup>                                                                                                                                                                                                                      |
| When available strong empathetic relationships with healthcare professionals provides strong therapeutic relationships | A minority of patients reported strong therapeutic relationships involving listening, empathy, validation, honesty and arranging tests and follow up. | “... actually just the experience of being heard and feeling like somebody got it and was being kind about it, but you know it was okay that they couldn’t do anything, I just kind of needed to know that I wasn’t losing it really and it was real what I was experiencing, I think so that was really helpful.” (Kingstone <i>et al</i> ) <sup>17</sup> |

1  
2  
3  
4  
5  
6  
7  
8  
9  
10  
11  
12  
13  
14  
15  
16  
17  
18  
19  
20  
21  
22  
23  
24  
25  
26  
27  
28  
29  
30  
31  
32  
33  
34  
35  
36  
37  
38  
39  
40  
41  
42  
43  
44  
45  
46

For peer review only



# PRISMA 2009 Checklist

| Section/topic                      | #  | Checklist item                                                                                                                                                                                                                                                                                              | Reported on page #   |
|------------------------------------|----|-------------------------------------------------------------------------------------------------------------------------------------------------------------------------------------------------------------------------------------------------------------------------------------------------------------|----------------------|
| <b>TITLE</b>                       |    |                                                                                                                                                                                                                                                                                                             |                      |
| Title                              | 1  | Identify the report as a systematic review, meta-analysis, or both.                                                                                                                                                                                                                                         | 1                    |
| <b>ABSTRACT</b>                    |    |                                                                                                                                                                                                                                                                                                             |                      |
| Structured summary                 | 2  | Provide a structured summary including, as applicable: background; objectives; data sources; study eligibility criteria, participants, and interventions; study appraisal and synthesis methods; results; limitations; conclusions and implications of key findings; systematic review registration number. | 2                    |
| <b>INTRODUCTION</b>                |    |                                                                                                                                                                                                                                                                                                             |                      |
| Rationale                          | 3  | Describe the rationale for the review in the context of what is already known.                                                                                                                                                                                                                              | 3                    |
| Objectives                         | 4  | Provide an explicit statement of questions being addressed with reference to participants, interventions, comparisons, outcomes, and study design (PICOS).                                                                                                                                                  | 4                    |
| <b>METHODS</b>                     |    |                                                                                                                                                                                                                                                                                                             |                      |
| Protocol and registration          | 5  | Indicate if a review protocol exists, if and where it can be accessed (e.g., Web address), and, if available, provide registration information including registration number.                                                                                                                               | 4                    |
| Eligibility criteria               | 6  | Specify study characteristics (e.g., PICOS, length of follow-up) and report characteristics (e.g., years considered, language, publication status) used as criteria for eligibility, giving rationale.                                                                                                      | 4                    |
| Information sources                | 7  | Describe all information sources (e.g., databases with dates of coverage, contact with study authors to identify additional studies) in the search and date last searched.                                                                                                                                  | 4                    |
| Search                             | 8  | Present full electronic search strategy for at least one database, including any limits used, such that it could be repeated.                                                                                                                                                                               | Supplementary file 2 |
| Study selection                    | 9  | State the process for selecting studies (i.e., screening, eligibility, included in systematic review, and, if applicable, included in the meta-analysis).                                                                                                                                                   | 5                    |
| Data collection process            | 10 | Describe method of data extraction from reports (e.g., piloted forms, independently, in duplicate) and any processes for obtaining and confirming data from investigators.                                                                                                                                  | 5                    |
| Data items                         | 11 | List and define all variables for which data were sought (e.g., PICOS, funding sources) and any assumptions and simplifications made.                                                                                                                                                                       | 5                    |
| Risk of bias in individual studies | 12 | Describe methods used for assessing risk of bias of individual studies (including specification of whether this was done at the study or outcome level), and how this information is to be used in any data synthesis.                                                                                      | 5                    |
| Summary measures                   | 13 | State the principal summary measures (e.g., risk ratio, difference in means).                                                                                                                                                                                                                               | 5                    |
| Synthesis of results               | 14 | Describe the methods of handling data and combining results of studies, if done, including measures of consistency (e.g., $I^2$ ) for each meta-analysis.                                                                                                                                                   | 5                    |

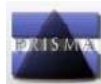

# PRISMA 2009 Checklist

Page 1 of 2

| Section/topic                 | #  | Checklist item                                                                                                                                                                                           | Reported on page #   |
|-------------------------------|----|----------------------------------------------------------------------------------------------------------------------------------------------------------------------------------------------------------|----------------------|
| Risk of bias across studies   | 15 | Specify any assessment of risk of bias that may affect the cumulative evidence (e.g., publication bias, selective reporting within studies).                                                             | 6                    |
| Additional analyses           | 16 | Describe methods of additional analyses (e.g., sensitivity or subgroup analyses, meta-regression), if done, indicating which were pre-specified.                                                         | n/a                  |
| <b>RESULTS</b>                |    |                                                                                                                                                                                                          |                      |
| Study selection               | 17 | Give numbers of studies screened, assessed for eligibility, and included in the review, with reasons for exclusions at each stage, ideally with a flow diagram.                                          | 6 and PRISMA diagram |
| Study characteristics         | 18 | For each study, present characteristics for which data were extracted (e.g., study size, PICOS, follow-up period) and provide the citations.                                                             | 19                   |
| Risk of bias within studies   | 19 | Present data on risk of bias of each study and, if available, any outcome level assessment (see item 12).                                                                                                | 21                   |
| Results of individual studies | 20 | For all outcomes considered (benefits or harms), present, for each study: (a) simple summary data for each intervention group (b) effect estimates and confidence intervals, ideally with a forest plot. | 7                    |
| Synthesis of results          | 21 | Present results of each meta-analysis done, including confidence intervals and measures of consistency.                                                                                                  | n/a                  |
| Risk of bias across studies   | 22 | Present results of any assessment of risk of bias across studies (see Item 15).                                                                                                                          | 6                    |
| Additional analysis           | 23 | Give results of additional analyses, if done (e.g., sensitivity or subgroup analyses, meta-regression [see Item 16]).                                                                                    | n/a                  |
| <b>DISCUSSION</b>             |    |                                                                                                                                                                                                          |                      |
| Summary of evidence           | 24 | Summarize the main findings including the strength of evidence for each main outcome; consider their relevance to key groups (e.g., healthcare providers, users, and policy makers).                     | 12                   |
| Limitations                   | 25 | Discuss limitations at study and outcome level (e.g., risk of bias), and at review-level (e.g., incomplete retrieval of identified research, reporting bias).                                            | 12                   |
| Conclusions                   | 26 | Provide a general interpretation of the results in the context of other evidence, and implications for future research.                                                                                  | 13                   |
| <b>FUNDING</b>                |    |                                                                                                                                                                                                          |                      |
| Funding                       | 27 | Describe sources of funding for the systematic review and other support (e.g., supply of data); role of funders for the systematic review.                                                               | 14                   |

41

42 From: Moher D, Liberati A, Tetzlaff J, Altman DG, The PRISMA Group (2009). Preferred Reporting Items for Systematic Reviews and Meta-Analyses: The PRISMA Statement. PLoS Med 6(7): e1000097.  
 43 doi:10.1371/journal.pmed1000097

44

For more information, visit: [www.prisma-statement.org](http://www.prisma-statement.org).

45

For peer review only - <http://bmjopen.bmj.com/site/about/guidelines.xhtml>

46

47
